# Supplementary material for: Generalization of contextual fear is sex-specifically affected by high salt intake
Source: PubMed Central journal article supplement (PMC10343085; doi:10.1371/journal.pone.0286221), 2023-07-13
Supplement: pone.0286221.s001.pdf [file pone.0286221.s001.pdf]

## Supplemental Material for

Generalization of contextual fear is sex-specifically affected by high salt intake

Jasmin N. Beaver<sup>1,2</sup>, Brady L. Weber<sup>1,2</sup>, Matthew T. Ford<sup>1</sup>, Anna E. Anello<sup>1,2</sup>, Kaden M. Ruffin<sup>1</sup>,  
Sarah K. Kassis<sup>1,2</sup>, T. Lee Gilman<sup>1,2,3\*</sup>

<sup>1</sup>Department of Psychological Sciences, Kent State University, Kent, Ohio, United States of America

<sup>2</sup>Brain Health Research Institute, Kent State University, Kent, Ohio, United States of America

<sup>3</sup>Healthy Communities Research Institute, Kent State University, Kent, Ohio, United States of America

\*Corresponding Author

Email: [lgilman1@kent.edu](mailto:lgilman1@kent.edu) (TLG)

**S1 Table. Three-way repeated measures ANOVAs on context fear ‘training’ for control no shock mice across Experiments.**

S1A Table

| <b>Experiment 1</b> | <b>No Shock – Context Fear Training</b> |                |                                 |
|---------------------|-----------------------------------------|----------------|---------------------------------|
| Sex                 | F(1,30)=0.036                           | p=0.850        | partial $\eta^2$ =0.001         |
| Diet                | F(1,30)=1.003                           | p=0.325        | partial $\eta^2$ =0.032         |
| Time                | F(2.92,87.68)=3.688                     | <b>p=0.016</b> | partial $\eta^2$ = <b>0.109</b> |
| Time × Sex          | F(2.92,87.68)=2.055                     | p=0.114        | partial $\eta^2$ =0.064         |
| Time × Diet         | F(2.92,87.68)=0.653                     | p=0.579        | partial $\eta^2$ =0.021         |
| Sex × Diet          | F(1,30)=0.000                           | p=0.990        | partial $\eta^2$ =0.000         |
| Time × Sex × Diet   | F(2.92,87.68)=2.404                     | p=0.074        | partial $\eta^2$ =0.074         |

S1B Table

| <b>Experiment 2</b> | <b>No Shock – Context Fear Training</b> |                   |                                 |
|---------------------|-----------------------------------------|-------------------|---------------------------------|
| Sex                 | F(1,30)=0.516                           | p=0.478           | partial $\eta^2$ =0.017         |
| Diet                | F(1,30)=0.012                           | p=0.915           | partial $\eta^2$ =0.000         |
| Time                | F(3.05,91.62)=6.466                     | <b>p&lt;0.001</b> | partial $\eta^2$ = <b>0.177</b> |
| Time × Sex          | F(3.05,91.62)=1.258                     | p=0.294           | partial $\eta^2$ =0.040         |
| Time × Diet         | F(3.05,91.62)=1.032                     | p=0.383           | partial $\eta^2$ =0.033         |
| Sex × Diet          | F(1,30)=3.135                           | p=0.087           | partial $\eta^2$ =0.095         |
| Time × Sex × Diet   | F(3.05,91.62)=0.710                     | p=0.551           | partial $\eta^2$ =0.023         |

S1C Table

| <b>Experiment 3</b> | <b>No Shock – Context Fear Training</b> |                |                                 |
|---------------------|-----------------------------------------|----------------|---------------------------------|
| Sex                 | F(1,27)=11.10                           | p=0.003        | partial $\eta^2$ =0.291         |
| Diet                | F(1,27)=0.245                           | p=0.625        | partial $\eta^2$ =0.009         |
| Time                | F(2.44,65.88)=3.016                     | p=0.046        | partial $\eta^2$ =0.100         |
| Time × Sex          | F(2.44,65.88)=3.091                     | <b>p=0.042</b> | partial $\eta^2$ = <b>0.103</b> |
| Time × Diet         | F(2.44,65.88)=0.668                     | p=0.545        | partial $\eta^2$ =0.024         |
| Sex × Diet          | F(1,27)=2.753                           | p=0.109        | partial $\eta^2$ =0.093         |
| Time × Sex × Diet   | F(2.44,65.88)=1.590                     | p=0.207        | partial $\eta^2$ =0.056         |
