# Supplementary material for: Generalization of contextual fear is sex-specifically affected by high salt intake
Source: PubMed Central journal article supplement (PMC10343085; doi:10.1371/journal.pone.0286221), 2023-07-13
Supplement: pone.0286221.s002.pdf [file pone.0286221.s002.pdf]

## Supplemental Material for

Generalization of contextual fear is sex-specifically affected by high salt intake

Jasmin N. Beaver<sup>1,2</sup>, Brady L. Weber<sup>1,2</sup>, Matthew T. Ford<sup>1</sup>, Anna E. Anello<sup>1,2</sup>, Kaden M. Ruffin<sup>1</sup>, Sarah K. Kassis<sup>1,2</sup>, T. Lee Gilman<sup>1,2,3\*</sup>

<sup>1</sup>Department of Psychological Sciences, Kent State University, Kent, Ohio, United States of America

<sup>2</sup>Brain Health Research Institute, Kent State University, Kent, Ohio, United States of America

<sup>3</sup>Healthy Communities Research Institute, Kent State University, Kent, Ohio, United States of America

\*Corresponding Author

Email: [lgilman1@kent.edu](mailto:lgilman1@kent.edu) (TLG)

**S2 Table. Three-way ANOVAs on context fear testing of control no shock mice across Experiments.**

| <b>Context Fear Expression</b> | <b>No Shock Groups Across Experiments</b> |                |                                 |
|--------------------------------|-------------------------------------------|----------------|---------------------------------|
| Sex                            | F(1,87)=2.852                             | p=0.095        | partial $\eta^2$ =0.032         |
| Diet                           | F(1,87)=0.497                             | p=0.483        | partial $\eta^2$ =0.006         |
| Experiment                     | F(2,87)=3.187                             | p=0.046        | partial $\eta^2$ =0.068         |
| Sex × Diet                     | F(1,87)=0.748                             | p=0.390        | partial $\eta^2$ =0.009         |
| Sex × Experiment               | F(2,87)=6.137                             | <b>p=0.003</b> | partial $\eta^2$ = <b>0.124</b> |
| Diet × Experiment              | F(2,87)=0.839                             | p=0.436        | partial $\eta^2$ =0.019         |
| Sex × Diet × Experiment        | F(2,87)=0.447                             | p=0.641        | partial $\eta^2$ =0.010         |
