# Supplementary material for: Generalization of contextual fear is sex-specifically affected by high salt intake
Source: PubMed Central journal article supplement (PMC10343085; doi:10.1371/journal.pone.0286221), 2023-07-13
Supplement: pone.0286221.s003.pdf [file pone.0286221.s003.pdf]

## Supplemental Material for

Generalization of contextual fear is sex-specifically affected by high salt intake

Jasmin N. Beaver<sup>1,2</sup>, Brady L. Weber<sup>1,2</sup>, Matthew T. Ford<sup>1</sup>, Anna E. Anello<sup>1,2</sup>, Kaden M. Ruffin<sup>1</sup>,  
Sarah K. Kassis<sup>1,2</sup>, T. Lee Gilman<sup>1,2,3\*</sup>

<sup>1</sup>Department of Psychological Sciences, Kent State University, Kent, Ohio, United States of America

<sup>2</sup>Brain Health Research Institute, Kent State University, Kent, Ohio, United States of America

<sup>3</sup>Healthy Communities Research Institute, Kent State University, Kent, Ohio, United States of America

\*Corresponding Author

Email: [lgilman1@kent.edu](mailto:lgilman1@kent.edu) (TLG)

**S3 Table. Three-way repeated measures ANOVAs on context fear training for context fear conditioned mice of both sexes in Experiment 1.**

S3A Table

| <b>Females</b>        | <b>Experiment 1 – Context Fear Training</b> |                   |                                 |
|-----------------------|---------------------------------------------|-------------------|---------------------------------|
| Diet                  | F(1,29)=0.145                               | p=0.706           | partial $\eta^2$ =0.005         |
| Context               | F(1,29)=0.009                               | p=0.927           | partial $\eta^2$ =0.000         |
| Time                  | F(4.00,115.9)=111.3                         | <b>p&lt;0.001</b> | partial $\eta^2$ = <b>0.793</b> |
| Time × Diet           | F(4.00,115.9)=0.377                         | p=0.824           | partial $\eta^2$ =0.013         |
| Time × Context        | F(4.00,115.9)=0.844                         | p=0.500           | partial $\eta^2$ =0.028         |
| Diet × Context        | F(1,29)=0.024                               | p=0.879           | partial $\eta^2$ =0.001         |
| Time × Diet × Context | F(4.00,115.9)=0.849                         | p=0.497           | partial $\eta^2$ =0.028         |

S3B Table

| <b>Males</b>          | <b>Experiment 1 – Context Fear Training</b> |                   |                                 |
|-----------------------|---------------------------------------------|-------------------|---------------------------------|
| Diet                  | F(1,28)=0.538                               | p=0.470           | partial $\eta^2$ =0.019         |
| Context               | F(1,28)=0.033                               | p=0.857           | partial $\eta^2$ =0.001         |
| Time                  | F(3.56,99.68)=59.79                         | <b>p&lt;0.001</b> | partial $\eta^2$ = <b>0.681</b> |
| Time × Diet           | F(3.56,99.68)=0.167                         | p=0.941           | partial $\eta^2$ =0.006         |
| Time × Context        | F(3.56,99.68)=0.271                         | p=0.877           | partial $\eta^2$ =0.010         |
| Diet × Context        | F(1,28)=0.013                               | p=0.909           | partial $\eta^2$ =0.000         |
| Time × Diet × Context | F(3.56,99.68)=0.266                         | p=0.880           | partial $\eta^2$ =0.009         |
