# Supplementary material for: Generalization of contextual fear is sex-specifically affected by high salt intake
Source: PubMed Central journal article supplement (PMC10343085; doi:10.1371/journal.pone.0286221), 2023-07-13
Supplement: pone.0286221.s004.pdf [file pone.0286221.s004.pdf]

## Supplemental Material for

Generalization of contextual fear is sex-specifically affected by high salt intake

Jasmin N. Beaver<sup>1,2</sup>, Brady L. Weber<sup>1,2</sup>, Matthew T. Ford<sup>1</sup>, Anna E. Anello<sup>1,2</sup>, Kaden M. Ruffin<sup>1</sup>, Sarah K. Kassis<sup>1,2</sup>, T. Lee Gilman<sup>1,2,3\*</sup>

<sup>1</sup>Department of Psychological Sciences, Kent State University, Kent, Ohio, United States of America

<sup>2</sup>Brain Health Research Institute, Kent State University, Kent, Ohio, United States of America

<sup>3</sup>Healthy Communities Research Institute, Kent State University, Kent, Ohio, United States of America

\*Corresponding Author

Email: [lgilman1@kent.edu](mailto:lgilman1@kent.edu) (TLG)

**S4 Table. Three-way repeated measures ANOVAs on context fear training for context fear conditioned mice of both sexes in Experiment 2.**

S4A Table

| <b>Females</b>        | <b>Experiment 2 – Context Fear Training</b> |                   |                                 |
|-----------------------|---------------------------------------------|-------------------|---------------------------------|
| Diet                  | F(1,29)=0.083                               | p=0.775           | partial $\eta^2$ =0.003         |
| Context               | F(1,29)=0.097                               | p=0.758           | partial $\eta^2$ =0.003         |
| Time                  | F(4.11,119.1)=121.2                         | <b>p&lt;0.001</b> | partial $\eta^2$ = <b>0.807</b> |
| Time × Diet           | F(4.11,119.1)=0.354                         | p=0.845           | partial $\eta^2$ =0.012         |
| Time × Context        | F(4.11,119.1)=0.259                         | p=0.908           | partial $\eta^2$ =0.009         |
| Diet × Context        | F(1,29)=0.104                               | p=0.750           | partial $\eta^2$ =0.004         |
| Time × Diet × Context | F(4.11,119.1)=0.537                         | p=0.714           | partial $\eta^2$ =0.018         |

S4 Table

| <b>Males</b>          | <b>Experiment 2 – Context Fear Training</b> |                   |                                 |
|-----------------------|---------------------------------------------|-------------------|---------------------------------|
| Diet                  | F(1,31)=2.080                               | p=0.159           | partial $\eta^2$ =0.063         |
| Context               | F(1,31)=0.111                               | p=0.741           | partial $\eta^2$ =0.004         |
| Time                  | F(3.26,101.0)=103.1                         | <b>p&lt;0.001</b> | partial $\eta^2$ = <b>0.769</b> |
| Time × Diet           | F(3.26,101.0)=2.166                         | p=0.091           | partial $\eta^2$ =0.065         |
| Time × Context        | F(3.26,101.0)=0.402                         | p=0.768           | partial $\eta^2$ =0.013         |
| Diet × Context        | F(1,31)=1.332                               | p=0.257           | partial $\eta^2$ =0.041         |
| Time × Diet × Context | F(3.26,101.0)=1.512                         | p=0.213           | partial $\eta^2$ =0.047         |
