# Supplementary material for: Generalization of contextual fear is sex-specifically affected by high salt intake
Source: PubMed Central journal article supplement (PMC10343085; doi:10.1371/journal.pone.0286221), 2023-07-13
Supplement: pone.0286221.s005.pdf [file pone.0286221.s005.pdf]

## Supplemental Material for

Generalization of contextual fear is sex-specifically affected by high salt intake

Jasmin N. Beaver<sup>1,2</sup>, Brady L. Weber<sup>1,2</sup>, Matthew T. Ford<sup>1</sup>, Anna E. Anello<sup>1,2</sup>, Kaden M. Ruffin<sup>1</sup>,  
Sarah K. Kassis<sup>1,2</sup>, T. Lee Gilman<sup>1,2,3\*</sup>

<sup>1</sup>Department of Psychological Sciences, Kent State University, Kent, Ohio, United States of America

<sup>2</sup>Brain Health Research Institute, Kent State University, Kent, Ohio, United States of America

<sup>3</sup>Healthy Communities Research Institute, Kent State University, Kent, Ohio, United States of America

\*Corresponding Author

Email: [lgilman1@kent.edu](mailto:lgilman1@kent.edu) (TLG)

**S5 Table. Three-way repeated measures ANOVAs on context fear training for context fear conditioned mice of both sexes in Experiment 3.**

S5A Table

| <b>Females</b>        | <b>Experiment 3 – Context Fear Training</b> |                   |                                 |
|-----------------------|---------------------------------------------|-------------------|---------------------------------|
| Diet                  | F(1,30)=0.777                               | p=0.385           | partial $\eta^2$ =0.025         |
| Context               | F(1,30)=0.514                               | p=0.479           | partial $\eta^2$ =0.017         |
| Time                  | F(3.82,114.7)=100.9                         | <b>p&lt;0.001</b> | partial $\eta^2$ = <b>0.771</b> |
| Time × Diet           | F(3.82,114.7)=2.287                         | p=0.067           | partial $\eta^2$ =0.071         |
| Time × Context        | F(3.82,114.7)=1.008                         | p=0.404           | partial $\eta^2$ =0.033         |
| Diet × Context        | F(1,30)=0.250                               | p=0.621           | partial $\eta^2$ =0.008         |
| Time × Diet × Context | F(3.82,114.7)=0.185                         | p=0.940           | partial $\eta^2$ =0.006         |

S5B Table

| <b>Males</b>          | <b>Experiment 3 – Context Fear Training</b> |                   |                                 |
|-----------------------|---------------------------------------------|-------------------|---------------------------------|
| Diet                  | F(1,27)=1.070                               | p=0.310           | partial $\eta^2$ =0.038         |
| Context               | F(1,27)=0.241                               | p=0.628           | partial $\eta^2$ =0.009         |
| Time                  | F(2.84,76.71)=79.15                         | <b>p&lt;0.001</b> | partial $\eta^2$ = <b>0.746</b> |
| Time × Diet           | F(2.84,76.71)=0.332                         | p=0.792           | partial $\eta^2$ =0.012         |
| Time × Context        | F(2.84,76.71)=0.146                         | p=0.924           | partial $\eta^2$ =0.005         |
| Diet × Context        | F(1,27)=0.533                               | p=0.472           | partial $\eta^2$ =0.019         |
| Time × Diet × Context | F(2.84,76.71)=0.413                         | p=0.733           | partial $\eta^2$ =0.015         |
