# Supplementary material for: Generalization of contextual fear is sex-specifically affected by high salt intake
Source: PubMed Central journal article supplement (PMC10343085; doi:10.1371/journal.pone.0286221), 2023-07-13
Supplement: pone.0286221.s006.pdf [file pone.0286221.s006.pdf]

## Supplemental Material for

Generalization of contextual fear is sex-specifically affected by high salt intake

Jasmin N. Beaver<sup>1,2</sup>, Brady L. Weber<sup>1,2</sup>, Matthew T. Ford<sup>1</sup>, Anna E. Anello<sup>1,2</sup>, Kaden M. Ruffin<sup>1</sup>,  
Sarah K. Kassis<sup>1,2</sup>, T. Lee Gilman<sup>1,2,3\*</sup>

<sup>1</sup>Department of Psychological Sciences, Kent State University, Kent, Ohio, United States of America

<sup>2</sup>Brain Health Research Institute, Kent State University, Kent, Ohio, United States of America

<sup>3</sup>Healthy Communities Research Institute, Kent State University, Kent, Ohio, United States of America

\*Corresponding Author

Email: [lgilman1@kent.edu](mailto:lgilman1@kent.edu) (TLG)

**S6 Table. Three-way repeated measures ANOVAs on full 10 min time course of context fear testing for control no shock mice across Experiments.**

| <b>Experiment 1</b> | <b>No Shock – Context Fear Testing</b> |                |                        |
|---------------------|----------------------------------------|----------------|------------------------|
| Sex                 | F(1,30)=5.414                          | <b>p=0.027</b> | partial $\eta^2=0.153$ |
| Diet                | F(1,30)=1.972                          | p=0.170        | partial $\eta^2=0.062$ |
| Time                | F(8.43,252.8)=1.005                    | p=0.453        | partial $\eta^2=0.032$ |
| Time × Sex          | F(8.43,252.8)=0.602                    | p=0.784        | partial $\eta^2=0.020$ |
| Time × Diet         | F(8.43,252.8)=0.706                    | p=0.693        | partial $\eta^2=0.023$ |
| Sex × Diet          | F(1,30)=0.138                          | p=0.713        | partial $\eta^2=0.005$ |
| Time × Sex × Diet   | F(8.43,252.8)=1.022                    | p=0.421        | partial $\eta^2=0.033$ |

| <b>Experiment 2</b> | <b>No Shock – Context Fear Testing</b> |                   |                        |
|---------------------|----------------------------------------|-------------------|------------------------|
| Sex                 | F(1,30)=5.647                          | <b>p=0.024</b>    | partial $\eta^2=0.158$ |
| Diet                | F(1,30)=0.000                          | p=0.992           | partial $\eta^2=0.000$ |
| Time                | F(7.15,214.5)=3.614                    | <b>p&lt;0.001</b> | partial $\eta^2=0.108$ |
| Time × Sex          | F(7.15,214.5)=1.753                    | p=0.097           | partial $\eta^2=0.055$ |
| Time × Diet         | F(7.15,214.5)=1.166                    | p=0.323           | partial $\eta^2=0.037$ |
| Sex × Diet          | F(1,30)=0.317                          | p=0.578           | partial $\eta^2=0.010$ |
| Time × Sex × Diet   | F(7.15,214.5)=0.863                    | p=0.538           | partial $\eta^2=0.028$ |

| <b>Experiment 3</b> | <b>No Shock – Context Fear Testing</b> |         |                        |
|---------------------|----------------------------------------|---------|------------------------|
| Sex                 | F(1,27)=3.799                          | p=0.062 | partial $\eta^2=0.123$ |
| Diet                | F(1,27)=0.002                          | p=0.966 | partial $\eta^2=0.000$ |
| Time                | F(7.48,202.0)=1.440                    | p=0.186 | partial $\eta^2=0.051$ |
| Time × Sex          | F(7.48,202.0)=1.459                    | p=0.179 | partial $\eta^2=0.051$ |
| Time × Diet         | F(7.48,202.0)=0.549                    | p=0.807 | partial $\eta^2=0.020$ |
| Sex × Diet          | F(1,27)=0.890                          | p=0.354 | partial $\eta^2=0.032$ |
| Time × Sex × Diet   | F(7.48,202.0)=0.459                    | p=0.874 | partial $\eta^2=0.017$ |
