# Supplementary material for: Generalization of contextual fear is sex-specifically affected by high salt intake
Source: PubMed Central journal article supplement (PMC10343085; doi:10.1371/journal.pone.0286221), 2023-07-13
Supplement: pone.0286221.s008.pdf [file pone.0286221.s008.pdf]

## Supplemental Material for

Generalization of contextual fear is sex-specifically affected by high salt intake

Jasmin N. Beaver<sup>1,2</sup>, Brady L. Weber<sup>1,2</sup>, Matthew T. Ford<sup>1</sup>, Anna E. Anello<sup>1,2</sup>, Kaden M. Ruffin<sup>1</sup>, Sarah K. Kassis<sup>1,2</sup>, T. Lee Gilman<sup>1,2,3\*</sup>

<sup>1</sup>Department of Psychological Sciences, Kent State University, Kent, Ohio, United States of America

<sup>2</sup>Brain Health Research Institute, Kent State University, Kent, Ohio, United States of America

<sup>3</sup>Healthy Communities Research Institute, Kent State University, Kent, Ohio, United States of America

\*Corresponding Author

Email: [lgilman1@kent.edu](mailto:lgilman1@kent.edu) (TLG)

**S8 Table. Three-way repeated measures ANOVAs on full 10 min time course of context fear testing for mice of both sexes in Experiment 1.**

S8A Table

| <b>Females</b>        | <b>Experiment 1 – Context Fear Testing</b> |                |                                 |
|-----------------------|--------------------------------------------|----------------|---------------------------------|
| Diet                  | F(1,29)=0.539                              | p=0.469        | partial $\eta^2$ =0.018         |
| Context               | F(1,29)=56.67                              | p<0.001        | partial $\eta^2$ =0.661         |
| Time                  | F(8.41,244.0)=7.535                        | p<0.001        | partial $\eta^2$ =0.206         |
| Time × Diet           | F(8.41,244.0)=0.675                        | p=0.721        | partial $\eta^2$ =0.023         |
| Time × Context        | F(8.41,244.0)=2.142                        | <b>p=0.030</b> | partial $\eta^2$ = <b>0.069</b> |
| Diet × Context        | F(1,29)=0.491                              | p=0.489        | partial $\eta^2$ =0.017         |
| Time × Diet × Context | F(8.41,244.0)=0.771                        | p=0.635        | partial $\eta^2$ =0.026         |

S8B Table

| <b>Males</b>          | <b>Experiment 1 – Context Fear Testing</b> |                   |                                 |
|-----------------------|--------------------------------------------|-------------------|---------------------------------|
| Diet                  | F(1,28)=2.622                              | p=0.117           | partial $\eta^2$ =0.086         |
| Context               | F(1,28)=39.04                              | p=0.857           | partial $\eta^2$ =0.582         |
| Time                  | F(7.48,209.4)=2.649                        | p=0.010           | partial $\eta^2$ =0.086         |
| Time × Diet           | F(7.48,209.4)=0.509                        | p=0.838           | partial $\eta^2$ =0.018         |
| Time × Context        | F(7.48,209.4)=3.909                        | <b>p&lt;0.001</b> | partial $\eta^2$ = <b>0.122</b> |
| Diet × Context        | F(1,28)=3.371                              | p=0.077           | partial $\eta^2$ =0.107         |
| Time × Diet × Context | F(7.48,209.4)=0.772                        | p=0.620           | partial $\eta^2$ =0.027         |
