# Supplementary material for: Generalization of contextual fear is sex-specifically affected by high salt intake
Source: PubMed Central journal article supplement (PMC10343085; doi:10.1371/journal.pone.0286221), 2023-07-13
Supplement: pone.0286221.s009.pdf [file pone.0286221.s009.pdf]

## Supplemental Material for

Generalization of contextual fear is sex-specifically affected by high salt intake

Jasmin N. Beaver<sup>1,2</sup>, Brady L. Weber<sup>1,2</sup>, Matthew T. Ford<sup>1</sup>, Anna E. Anello<sup>1,2</sup>, Kaden M. Ruffin<sup>1</sup>,  
Sarah K. Kassis<sup>1,2</sup>, T. Lee Gilman<sup>1,2,3\*</sup>

<sup>1</sup>Department of Psychological Sciences, Kent State University, Kent, Ohio, United States of America

<sup>2</sup>Brain Health Research Institute, Kent State University, Kent, Ohio, United States of America

<sup>3</sup>Healthy Communities Research Institute, Kent State University, Kent, Ohio, United States of America

\*Corresponding Author

Email: [lgilman1@kent.edu](mailto:lgilman1@kent.edu) (TLG)

**S9 Table. Three-way repeated measures ANOVAs on full 10 min time course of context fear testing for mice of both sexes in Experiment 2.**

S9A Table

| <b>Females</b>        | <b>Experiment 2 – Context Fear Testing</b> |                   |                                 |
|-----------------------|--------------------------------------------|-------------------|---------------------------------|
| Diet                  | F(1,29)=0.858                              | p=0.362           | partial $\eta^2$ =0.029         |
| Context               | F(1,29)=109.8                              | <b>p&lt;0.001</b> | partial $\eta^2$ = <b>0.791</b> |
| Time                  | F(8.06,233.7)=4.180                        | <b>p&lt;0.001</b> | partial $\eta^2$ = <b>0.126</b> |
| Time × Diet           | F(8.06,233.7)=0.873                        | p=0.541           | partial $\eta^2$ =0.029         |
| Time × Context        | F(8.06,233.7)=1.429                        | p=0.184           | partial $\eta^2$ =0.047         |
| Diet × Context        | F(1,29)=0.363                              | p=0.552           | partial $\eta^2$ =0.012         |
| Time × Diet × Context | F(8.06,233.7)=0.739                        | p=0.658           | partial $\eta^2$ =0.025         |

S9B Table

| <b>Males</b>          | <b>Experiment 2 – Context Fear Testing</b> |                   |                                 |
|-----------------------|--------------------------------------------|-------------------|---------------------------------|
| Diet                  | F(1,31)=3.042                              | p=0.091           | partial $\eta^2$ =0.089         |
| Context               | F(1,31)=52.22                              | p<0.001           | partial $\eta^2$ =0.628         |
| Time                  | F(6.86,212.6)=6.425                        | p<0.001           | partial $\eta^2$ =0.172         |
| Time × Diet           | F(6.86,212.6)=1.542                        | p=0.066           | partial $\eta^2$ =0.047         |
| Time × Context        | F(6.86,212.6)=3.902                        | <b>p&lt;0.001</b> | partial $\eta^2$ = <b>0.112</b> |
| Diet × Context        | F(1,31)=1.344                              | p=0.255           | partial $\eta^2$ =0.042         |
| Time × Diet × Context | F(6.86,212.6)=1.188                        | p=0.312           | partial $\eta^2$ =0.037         |
