# Supplementary material for: Generalization of contextual fear is sex-specifically affected by high salt intake
Source: PubMed Central journal article supplement (PMC10343085; doi:10.1371/journal.pone.0286221), 2023-07-13
Supplement: pone.0286221.s010.pdf [file pone.0286221.s010.pdf]

## Supplemental Material for

Generalization of contextual fear is sex-specifically affected by high salt intake

Jasmin N. Beaver<sup>1,2</sup>, Brady L. Weber<sup>1,2</sup>, Matthew T. Ford<sup>1</sup>, Anna E. Anello<sup>1,2</sup>, Kaden M. Ruffin<sup>1</sup>, Sarah K. Kassis<sup>1,2</sup>, T. Lee Gilman<sup>1,2,3\*</sup>

<sup>1</sup>Department of Psychological Sciences, Kent State University, Kent, Ohio, United States of America

<sup>2</sup>Brain Health Research Institute, Kent State University, Kent, Ohio, United States of America

<sup>3</sup>Healthy Communities Research Institute, Kent State University, Kent, Ohio, United States of America

\*Corresponding Author

Email: [lgilman1@kent.edu](mailto:lgilman1@kent.edu) (TLG)

**S10 Table. Three-way repeated measures ANOVAs on full 10 min time course of context fear testing for mice of both sexes in Experiment 3.**

S10A Table

| <b>Females</b>        | <b>Experiment 3 – Context Fear Testing</b> |                   |                                 |
|-----------------------|--------------------------------------------|-------------------|---------------------------------|
| Diet                  | F(1,30)=0.646                              | p=0.428           | partial $\eta^2$ =0.021         |
| Context               | F(1,30)=15.64                              | <b>p&lt;0.001</b> | partial $\eta^2$ = <b>0.343</b> |
| Time                  | F(6.57,197.0)=5.706                        | <b>p&lt;0.001</b> | partial $\eta^2$ = <b>0.160</b> |
| Time × Diet           | F(6.57,197.0)=0.862                        | p=0.532           | partial $\eta^2$ =0.028         |
| Time × Context        | F(6.57,197.0)=1.029                        | p=0.410           | partial $\eta^2$ =0.033         |
| Diet × Context        | F(1,30)=1.045                              | p=0.315           | partial $\eta^2$ =0.034         |
| Time × Diet × Context | F(6.57,197.0)=0.614                        | p=0.733           | partial $\eta^2$ =0.020         |

S10B Table

| <b>Males</b>          | <b>Experiment 3 – Context Fear Testing</b> |                   |                                 |
|-----------------------|--------------------------------------------|-------------------|---------------------------------|
| Diet                  | F(1,27)=6.657                              | <b>p=0.016</b>    | partial $\eta^2$ = <b>0.198</b> |
| Context               | F(1,27)=109.0                              | <b>p&lt;0.001</b> | partial $\eta^2$ = <b>0.801</b> |
| Time                  | F(6.91,186.7)=2.821                        | <b>p=0.008</b>    | partial $\eta^2$ = <b>0.095</b> |
| Time × Diet           | F(6.91,186.7)=0.980                        | p=0.447           | partial $\eta^2$ =0.035         |
| Time × Context        | F(6.91,186.7)=1.150                        | p=0.334           | partial $\eta^2$ =0.041         |
| Diet × Context        | F(1,27)=0.476                              | p=0.496           | partial $\eta^2$ =0.017         |
| Time × Diet × Context | F(6.91,186.7)=1.474                        | p=0.180           | partial $\eta^2$ =0.052         |
