# Supplementary material for: Generalization of contextual fear is sex-specifically affected by high salt intake
Source: PubMed Central journal article supplement (PMC10343085; doi:10.1371/journal.pone.0286221), 2023-07-13
Supplement: pone.0286221.s011.pdf [file pone.0286221.s011.pdf]

## Supplemental Material for

Generalization of contextual fear is sex-specifically affected by high salt intake

Jasmin N. Beaver<sup>1,2</sup>, Brady L. Weber<sup>1,2</sup>, Matthew T. Ford<sup>1</sup>, Anna E. Anello<sup>1,2</sup>, Kaden M. Ruffin<sup>1</sup>,  
Sarah K. Kassis<sup>1,2</sup>, T. Lee Gilman<sup>1,2,3\*</sup>

<sup>1</sup>Department of Psychological Sciences, Kent State University, Kent, Ohio, United States of America

<sup>2</sup>Brain Health Research Institute, Kent State University, Kent, Ohio, United States of America

<sup>3</sup>Healthy Communities Research Institute, Kent State University, Kent, Ohio, United States of America

\*Corresponding Author

Email: [lgilman1@kent.edu](mailto:lgilman1@kent.edu) (TLG)

**S11 Table. Three-way ANOVAs on serum osmolality in control no shock mice across Experiments.**

| <b>Osmolality</b>       | <b>No Shock Groups Across Experiments</b> |                |                                 |
|-------------------------|-------------------------------------------|----------------|---------------------------------|
| Sex                     | F(1,89)=0.424                             | p=0.517        | partial $\eta^2$ =0.005         |
| Diet                    | F(1,89)=0.046                             | p=0.830        | partial $\eta^2$ =0.001         |
| Experiment              | F(1,89)=3.639                             | p=0.030        | partial $\eta^2$ =0.076         |
| Sex × Diet              | F(1,89)=0.510                             | p=0.477        | partial $\eta^2$ =0.006         |
| Sex × Experiment        | F(1,89)=4.287                             | <b>p=0.017</b> | partial $\eta^2$ = <b>0.088</b> |
| Diet × Experiment       | F(1,89)=1.729                             | p=0.183        | partial $\eta^2$ =0.037         |
| Sex × Diet × Experiment | F(1,89)=1.331                             | p=0.270        | partial $\eta^2$ =0.029         |
