# Supplementary material for: Generalization of contextual fear is sex-specifically affected by high salt intake
Source: PubMed Central journal article supplement (PMC10343085; doi:10.1371/journal.pone.0286221), 2023-07-13
Supplement: pone.0286221.s012.pdf [file pone.0286221.s012.pdf]

## Supplemental Material for

Generalization of contextual fear is sex-specifically affected by high salt intake

Jasmin N. Beaver<sup>1,2</sup>, Brady L. Weber<sup>1,2</sup>, Matthew T. Ford<sup>1</sup>, Anna E. Anello<sup>1,2</sup>, Kaden M. Ruffin<sup>1</sup>,  
Sarah K. Kassis<sup>1,2</sup>, T. Lee Gilman<sup>1,2,3\*</sup>

<sup>1</sup>Department of Psychological Sciences, Kent State University, Kent, Ohio, United States of America

<sup>2</sup>Brain Health Research Institute, Kent State University, Kent, Ohio, United States of America

<sup>3</sup>Healthy Communities Research Institute, Kent State University, Kent, Ohio, United States of America

\*Corresponding Author

Email: [lgilman1@kent.edu](mailto:lgilman1@kent.edu) (TLG)

**S12 Table. Three-way ANOVAs on serum osmolality in context fear conditioned mice across Experiments.**

| <b>Osmolality</b>    | <b>Context Trained Shock Groups</b>                 |                                                     |                                                     |
|----------------------|-----------------------------------------------------|-----------------------------------------------------|-----------------------------------------------------|
|                      | <b>Experiment 1</b>                                 | <b>Experiment 2</b>                                 | <b>Experiment 3</b>                                 |
| Sex                  | F(1,59)=1.662<br>p=0.202<br>partial $\eta^2$ =0.027 | F(1,62)=0.096<br>p=0.758<br>partial $\eta^2$ =0.002 | F(1,55)=0.086<br>p=0.771<br>partial $\eta^2$ =0.002 |
| Diet                 | F(1,59)=0.001<br>p=0.979<br>partial $\eta^2$ =0.000 | F(1,62)=0.673<br>p=0.415<br>partial $\eta^2$ =0.011 | F(1,55)=0.745<br>p=0.392<br>partial $\eta^2$ =0.013 |
| Context              | F(1,59)=1.339<br>p=0.252<br>partial $\eta^2$ =0.022 | F(1,62)=0.005<br>p=0.941<br>partial $\eta^2$ =0.000 | F(1,55)=1.440<br>p=0.235<br>partial $\eta^2$ =0.026 |
| Sex × Diet           | F(1,59)=0.012<br>p=0.912<br>partial $\eta^2$ =0.000 | F(1,62)=0.152<br>p=0.698<br>partial $\eta^2$ =0.002 | F(1,55)=0.213<br>p=0.646<br>partial $\eta^2$ =0.004 |
| Sex × Context        | F(1,59)=0.482<br>p=0.490<br>partial $\eta^2$ =0.008 | F(1,62)=0.020<br>p=0.888<br>partial $\eta^2$ =0.000 | F(1,55)=0.154<br>p=0.696<br>partial $\eta^2$ =0.003 |
| Diet × Context       | F(1,59)=1.903<br>p=0.173<br>partial $\eta^2$ =0.031 | F(1,62)=0.055<br>p=0.815<br>partial $\eta^2$ =0.001 | F(1,55)=0.781<br>p=0.381<br>partial $\eta^2$ =0.014 |
| Sex × Diet × Context | F(1,59)=0.003<br>p=0.959<br>partial $\eta^2$ =0.000 | F(1,62)=1.901<br>p=0.173<br>partial $\eta^2$ =0.030 | F(1,55)=0.856<br>p=0.359<br>partial $\eta^2$ =0.015 |
