# Supplementary material for: Generalization of contextual fear is sex-specifically affected by high salt intake
Source: PubMed Central journal article supplement (PMC10343085; doi:10.1371/journal.pone.0286221), 2023-07-13
Supplement: pone.0286221.s013.pdf [file pone.0286221.s013.pdf]

## Supplemental Material for

Generalization of contextual fear is sex-specifically affected by high salt intake

Jasmin N. Beaver<sup>1,2</sup>, Brady L. Weber<sup>1,2</sup>, Matthew T. Ford<sup>1</sup>, Anna E. Anello<sup>1,2</sup>, Kaden M. Ruffin<sup>1</sup>,  
Sarah K. Kassis<sup>1,2</sup>, T. Lee Gilman<sup>1,2,3\*</sup>

<sup>1</sup>Department of Psychological Sciences, Kent State University, Kent, Ohio, United States of America

<sup>2</sup>Brain Health Research Institute, Kent State University, Kent, Ohio, United States of America

<sup>3</sup>Healthy Communities Research Institute, Kent State University, Kent, Ohio, United States of America

\*Corresponding Author

Email: [lgilman1@kent.edu](mailto:lgilman1@kent.edu) (TLG)

**S13. Three-way ANOVAs on log-transformed serum corticosterone levels in control no shock mice across Experiments.**

| <b>Corticosterone</b>   | <b>No Shock Groups Across Experiments</b> |                |                                 |
|-------------------------|-------------------------------------------|----------------|---------------------------------|
| Sex                     | F(1,81)=12.77                             | p<0.001        | partial $\eta^2$ =0.136         |
| Diet                    | F(1,81)=2.498                             | p=0.118        | partial $\eta^2$ =0.030         |
| Experiment              | F(2,81)=12.81                             | p<0.001        | partial $\eta^2$ =0.240         |
| Sex × Diet              | F(1,81)=1.654                             | p=0.202        | partial $\eta^2$ =0.020         |
| Sex × Experiment        | F(2,81)=3.498                             | <b>p=0.035</b> | partial $\eta^2$ = <b>0.080</b> |
| Diet × Experiment       | F(2,81)=0.527                             | p=0.592        | partial $\eta^2$ =0.013         |
| Sex × Diet × Experiment | F(2,81)=1.512                             | p=0.227        | partial $\eta^2$ =0.036         |
