# Supplementary material for: Generalization of contextual fear is sex-specifically affected by high salt intake
Source: PubMed Central journal article supplement (PMC10343085; doi:10.1371/journal.pone.0286221), 2023-07-13
Supplement: pone.0286221.s014.pdf [file pone.0286221.s014.pdf]

## Supplemental Material for

Generalization of contextual fear is sex-specifically affected by high salt intake

Jasmin N. Beaver<sup>1,2</sup>, Brady L. Weber<sup>1,2</sup>, Matthew T. Ford<sup>1</sup>, Anna E. Anello<sup>1,2</sup>, Kaden M. Ruffin<sup>1</sup>,  
Sarah K. Kassis<sup>1,2</sup>, T. Lee Gilman<sup>1,2,3\*</sup>

<sup>1</sup>Department of Psychological Sciences, Kent State University, Kent, Ohio, United States of America

<sup>2</sup>Brain Health Research Institute, Kent State University, Kent, Ohio, United States of America

<sup>3</sup>Healthy Communities Research Institute, Kent State University, Kent, Ohio, United States of America

\*Corresponding Author

Email: [lgilman1@kent.edu](mailto:lgilman1@kent.edu) (TLG)

**S14 Table. Three-way ANOVAs on log-transformed serum corticosterone in context fear conditioned mice across Experiments.**

| <b>Corticosterone</b> | <b>Context Trained Shock Groups</b>                       |                                                           |                                                              |
|-----------------------|-----------------------------------------------------------|-----------------------------------------------------------|--------------------------------------------------------------|
|                       | <b>Experiment 1</b>                                       | <b>Experiment 2</b>                                       | <b>Experiment 3</b>                                          |
| Sex                   | F(1,52)=5.924<br><b>p=0.018</b><br>partial $\eta^2=0.102$ | F(1,59)=0.973<br>p=0.328<br>partial $\eta^2=0.016$        | F(1,53)=38.87<br><b>p&lt;0.001</b><br>partial $\eta^2=0.423$ |
| Diet                  | F(1,52)=1.107<br>p=0.298<br>partial $\eta^2=0.021$        | F(1,59)=1.540<br>p=0.220<br>partial $\eta^2=0.025$        | F(1,53)=1.170<br>p=0.284<br>partial $\eta^2=0.022$           |
| Context               | F(1,52)=0.325<br>p=0.571<br>partial $\eta^2=0.006$        | F(1,59)=5.074<br><b>p=0.028</b><br>partial $\eta^2=0.079$ | F(1,53)=0.000<br>p=0.992<br>partial $\eta^2=0.000$           |
| Sex × Diet            | F(1,52)=2.815<br>p=0.099<br>partial $\eta^2=0.051$        | F(1,59)=1.041<br>p=0.312<br>partial $\eta^2=0.017$        | F(1,53)=0.186<br>p=0.668<br>partial $\eta^2=0.003$           |
| Sex × Context         | F(1,52)=2.355<br>p=0.131<br>partial $\eta^2=0.043$        | F(1,59)=19.69<br>p=0.166<br>partial $\eta^2=0.032$        | F(1,53)=0.012<br>p=0.913<br>partial $\eta^2=0.000$           |
| Diet × Context        | F(1,52)=0.033<br>p=0.856<br>partial $\eta^2=0.001$        | F(1,59)=0.056<br>p=0.814<br>partial $\eta^2=0.001$        | F(1,53)=0.966<br>p=0.330<br>partial $\eta^2=0.018$           |
| Sex × Diet × Context  | F(1,52)=0.164<br>p=0.687<br>partial $\eta^2=0.003$        | F(1,59)=0.155<br>p=0.695<br>partial $\eta^2=0.003$        | F(1,53)=0.204<br>p=0.654<br>partial $\eta^2=0.004$           |
