# Supplementary material for: Generalization of contextual fear is sex-specifically affected by high salt intake
Source: PubMed Central journal article supplement (PMC10343085; doi:10.1371/journal.pone.0286221), 2023-07-13
Supplement: pone.0286221.s015.pdf [file pone.0286221.s015.pdf]

## Supplemental Material for

Generalization of contextual fear is sex-specifically affected by high salt intake

Jasmin N. Beaver<sup>1,2</sup>, Brady L. Weber<sup>1,2</sup>, Matthew T. Ford<sup>1</sup>, Anna E. Anello<sup>1,2</sup>, Kaden M. Ruffin<sup>1</sup>,  
Sarah K. Kassis<sup>1,2</sup>, T. Lee Gilman<sup>1,2,3\*</sup>

<sup>1</sup>Department of Psychological Sciences, Kent State University, Kent, Ohio, United States of America

<sup>2</sup>Brain Health Research Institute, Kent State University, Kent, Ohio, United States of America

<sup>3</sup>Healthy Communities Research Institute, Kent State University, Kent, Ohio, United States of America

\*Corresponding Author

Email: [lgilman1@kent.edu](mailto:lgilman1@kent.edu) (TLG)

**S15 Table. Three-way repeated measures ANOVAs on weekly average water consumption per day for context fear conditioned mice across Experiments.**

S15A Table

| <b>Females</b>        | <b>Experiment 1 – Water/day</b> |                   |                        |
|-----------------------|---------------------------------|-------------------|------------------------|
| Diet                  | F(1,30)=50.89                   | <b>p&lt;0.001</b> | partial $\eta^2=0.629$ |
| Context               | F(1,30)=0.361                   | p=0.553           | partial $\eta^2=0.012$ |
| Time                  | F(1.64,49.08)=0.680             | p=0.483           | partial $\eta^2=0.022$ |
| Time × Diet           | F(1.64,49.08)=0.225             | p=0.755           | partial $\eta^2=0.007$ |
| Time × Context        | F(1.64,49.08)=0.011             | p=0.977           | partial $\eta^2=0.000$ |
| Diet × Context        | F(1,30)=0.000                   | p=0.985           | partial $\eta^2=0.000$ |
| Time × Diet × Context | F(1.64,49.08)=0.613             | p=0.514           | partial $\eta^2=0.020$ |

S15B Table

| <b>Males</b>          | <b>Experiment 1 – Water/day</b> |                   |                        |
|-----------------------|---------------------------------|-------------------|------------------------|
| Diet                  | F(1,29)=13.40                   | <b>p&lt;0.001</b> | partial $\eta^2=0.316$ |
| Context               | F(1,29)=1.042                   | p=0.316           | partial $\eta^2=0.035$ |
| Time                  | F(1.27,36.92)=9.485             | <b>p=0.002</b>    | partial $\eta^2=0.246$ |
| Time × Diet           | F(1.27,36.92)=2.030             | p=0.159           | partial $\eta^2=0.065$ |
| Time × Context        | F(1.27,36.92)=0.411             | p=0.574           | partial $\eta^2=0.014$ |
| Diet × Context        | F(1,29)=1.036                   | p=0.317           | partial $\eta^2=0.035$ |
| Time × Diet × Context | F(1.27,36.92)=0.595             | p=0.484           | partial $\eta^2=0.020$ |

S15C Table

| <b>Females</b>        | <b>Experiment 2 – Water/day</b> |                   |                        |
|-----------------------|---------------------------------|-------------------|------------------------|
| Diet                  | F(1,30)=312.2                   | p<0.001           | partial $\eta^2=0.912$ |
| Context               | F(1,30)=0.026                   | p=0.874           | partial $\eta^2=0.001$ |
| Time                  | F(4.11,123.3)=4.981             | p<0.001           | partial $\eta^2=0.142$ |
| Time × Diet           | F(4.11,123.3)=5.091             | <b>p&lt;0.001</b> | partial $\eta^2=0.145$ |
| Time × Context        | F(4.11,123.3)=1.342             | p=0.258           | partial $\eta^2=0.043$ |
| Diet × Context        | F(1,30)=3.278                   | p=0.080           | partial $\eta^2=0.099$ |
| Time × Diet × Context | F(4.11,123.3)=0.991             | p=0.417           | partial $\eta^2=0.032$ |

S15D Table

| <b>Males</b> | <b>Experiment 2 – Water/day</b> |         |                        |
|--------------|---------------------------------|---------|------------------------|
| Diet         | F(1,32)=41.90                   | p<0.001 | partial $\eta^2=0.567$ |
| Context      | F(1,32)=0.533                   | p=0.471 | partial $\eta^2=0.016$ |
| Time         | F(3.25,103.9)=17.41             | p<0.001 | partial $\eta^2=0.352$ |

|                       |                     |                |                        |
|-----------------------|---------------------|----------------|------------------------|
| Time × Diet           | F(3.25,103.9)=3.360 | <b>p=0.019</b> | partial $\eta^2=0.095$ |
| Time × Context        | F(3.25,103.9)=0.454 | p=0.730        | partial $\eta^2=0.014$ |
| Diet × Context        | F(1,32)=0.765       | p=0.388        | partial $\eta^2=0.023$ |
| Time × Diet × Context | F(3.25,103.9)=0.938 | p=0.431        | partial $\eta^2=0.028$ |

---

S15E Table

| <b>Females</b>        | <b>Experiment 3 – Water/day</b> |                   |                        |
|-----------------------|---------------------------------|-------------------|------------------------|
| Diet                  | F(1,30)=91.88                   | <b>p&lt;0.001</b> | partial $\eta^2=0.754$ |
| Context               | F(1,30)=0.009                   | p=0.927           | partial $\eta^2=0.000$ |
| Time                  | F(3.16,94.64)=13.26             | <b>p&lt;0.001</b> | partial $\eta^2=0.306$ |
| Time × Diet           | F(3.16,94.64)=1.647             | p=0.182           | partial $\eta^2=0.052$ |
| Time × Context        | F(3.16,94.64)=0.249             | p=0.871           | partial $\eta^2=0.008$ |
| Diet × Context        | F(1,30)=0.039                   | p=0.845           | partial $\eta^2=0.001$ |
| Time × Diet × Context | F(3.16,94.64)=0.163             | p=0.928           | partial $\eta^2=0.005$ |

---

S15F Table

| <b>Males</b>          | <b>Experiment 3 – Water/day</b> |                   |                        |
|-----------------------|---------------------------------|-------------------|------------------------|
| Diet                  | F(1,27)=45.38                   | <b>p&lt;0.001</b> | partial $\eta^2=0.627$ |
| Context               | F(1,27)=0.201                   | p=0.657           | partial $\eta^2=0.007$ |
| Time                  | F(3.73,100.8)=17.83             | <b>p&lt;0.001</b> | partial $\eta^2=0.398$ |
| Time × Diet           | F(3.73,100.8)=2.515             | p=0.050           | partial $\eta^2=0.085$ |
| Time × Context        | F(3.73,100.8)=0.952             | p=0.433           | partial $\eta^2=0.034$ |
| Diet × Context        | F(1,27)=0.035                   | p=0.853           | partial $\eta^2=0.001$ |
| Time × Diet × Context | F(3.73,100.8)=0.445             | p=0.763           | partial $\eta^2=0.016$ |

---
