# Supplementary material for: Generalization of contextual fear is sex-specifically affected by high salt intake
Source: PubMed Central journal article supplement (PMC10343085; doi:10.1371/journal.pone.0286221), 2023-07-13
Supplement: pone.0286221.s016.pdf [file pone.0286221.s016.pdf]

## Supplemental Material for

Generalization of contextual fear is sex-specifically affected by high salt intake

Jasmin N. Beaver<sup>1,2</sup>, Brady L. Weber<sup>1,2</sup>, Matthew T. Ford<sup>1</sup>, Anna E. Anello<sup>1,2</sup>, Kaden M. Ruffin<sup>1</sup>,  
Sarah K. Kassis<sup>1,2</sup>, T. Lee Gilman<sup>1,2,3\*</sup>

<sup>1</sup>Department of Psychological Sciences, Kent State University, Kent, Ohio, United States of America

<sup>2</sup>Brain Health Research Institute, Kent State University, Kent, Ohio, United States of America

<sup>3</sup>Healthy Communities Research Institute, Kent State University, Kent, Ohio, United States of America

\*Corresponding Author

Email: [lgilman1@kent.edu](mailto:lgilman1@kent.edu) (TLG)

**S16 Table. Three-way repeated measures ANOVAs on weekly average food consumption per day for context fear conditioned mice across Experiments.**

S16A Table

| <b>Females</b>        | <b>Experiment 1 – Food/day</b> |                |                        |
|-----------------------|--------------------------------|----------------|------------------------|
| Diet                  | F(1,30)=6.785                  | <b>p=0.014</b> | partial $\eta^2=0.184$ |
| Context               | F(1,30)=0.099                  | p=0.756        | partial $\eta^2=0.003$ |
| Time                  | F(1.67,50.14)=0.650            | p=0.500        | partial $\eta^2=0.021$ |
| Time × Diet           | F(1.67,50.14)=0.578            | p=0.535        | partial $\eta^2=0.019$ |
| Time × Context        | F(1.67,50.14)=1.233            | p=0.295        | partial $\eta^2=0.039$ |
| Diet × Context        | F(1,30)=0.237                  | p=0.630        | partial $\eta^2=0.008$ |
| Time × Diet × Context | F(1.67,50.14)=0.809            | p=0.431        | partial $\eta^2=0.026$ |

S16B Table

| <b>Males</b>          | <b>Experiment 1 – Food/day</b> |         |                        |
|-----------------------|--------------------------------|---------|------------------------|
| Diet                  | F(1,29)=1.427                  | p=0.242 | partial $\eta^2=0.047$ |
| Context               | F(1,29)=0.013                  | p=0.910 | partial $\eta^2=0.000$ |
| Time                  | F(1.85,53.57)=1.825            | p=0.174 | partial $\eta^2=0.059$ |
| Time × Diet           | F(1.85,53.57)=0.332            | p=0.702 | partial $\eta^2=0.011$ |
| Time × Context        | F(1.85,53.57)=0.142            | p=0.852 | partial $\eta^2=0.005$ |
| Diet × Context        | F(1,29)=0.003                  | p=0.958 | partial $\eta^2=0.000$ |
| Time × Diet × Context | F(1.85,53.57)=0.866            | p=0.419 | partial $\eta^2=0.029$ |

S16C Table

| <b>Females</b>        | <b>Experiment 2 – Food/day</b> |                   |                        |
|-----------------------|--------------------------------|-------------------|------------------------|
| Diet                  | F(1,30)=41.57                  | <b>p&lt;0.001</b> | partial $\eta^2=0.581$ |
| Context               | F(1,30)=0.015                  | p=0.904           | partial $\eta^2=0.000$ |
| Time                  | F(3.72,111.5)=13.02            | <b>p&lt;0.001</b> | partial $\eta^2=0.303$ |
| Time × Diet           | F(3.72,111.5)=0.188            | p=0.936           | partial $\eta^2=0.006$ |
| Time × Context        | F(3.72,111.5)=1.323            | p=0.267           | partial $\eta^2=0.042$ |
| Diet × Context        | F(1,30)=0.032                  | p=0.859           | partial $\eta^2=0.001$ |
| Time × Diet × Context | F(3.72,111.5)=0.433            | p=0.771           | partial $\eta^2=0.014$ |

S16D Table

| <b>Males</b>   | <b>Experiment 2 – Food/day</b> |                   |                        |
|----------------|--------------------------------|-------------------|------------------------|
| Diet           | F(1,32)=3.836                  | p=0.059           | partial $\eta^2=0.107$ |
| Context        | F(1,32)=0.128                  | p=0.722           | partial $\eta^2=0.004$ |
| Time           | F(4.32,138.3)=10.30            | <b>p&lt;0.001</b> | partial $\eta^2=0.243$ |
| Time × Diet    | F(4.32,138.3)=1.317            | p=0.265           | partial $\eta^2=0.040$ |
| Time × Context | F(4.32,138.3)=0.451            | p=0.786           | partial $\eta^2=0.014$ |

Diet × Context F(1,32)=0.672 p=0.418 partial  $\eta^2$ =0.021  
 Time × Diet × Context F(4.32,138.3)=0.773 p=0.554 partial  $\eta^2$ =0.024

---

S16E Table

| <b>Females</b>        | <b>Experiment 3 – Food/day</b> |                   |                                 |
|-----------------------|--------------------------------|-------------------|---------------------------------|
| Diet                  | F(1,30)=16.65                  | <b>p&lt;0.001</b> | partial $\eta^2$ = <b>0.357</b> |
| Context               | F(1,30)=1.131                  | p=0.296           | partial $\eta^2$ =0.036         |
| Time                  | F(2.78,83.39)=5.015            | <b>p=0.004</b>    | partial $\eta^2$ = <b>0.143</b> |
| Time × Diet           | F(2.78,83.39)=1.584            | p=0.202           | partial $\eta^2$ =0.050         |
| Time × Context        | F(2.78,83.39)=0.457            | p=0.699           | partial $\eta^2$ =0.015         |
| Diet × Context        | F(1,30)=0.022                  | p=0.884           | partial $\eta^2$ =0.001         |
| Time × Diet × Context | F(2.78,83.39)=0.436            | p=0.713           | partial $\eta^2$ =0.014         |

---

S16F Table

| <b>Males</b>          | <b>Experiment 3 – Food/day</b> |                |                                 |
|-----------------------|--------------------------------|----------------|---------------------------------|
| Diet                  | F(1,28)=7.673                  | <b>p=0.010</b> | partial $\eta^2$ = <b>0.215</b> |
| Context               | F(1,28)=0.017                  | p=0.897        | partial $\eta^2$ =0.001         |
| Time                  | F(3.40,95.20)=5.087            | <b>p=0.002</b> | partial $\eta^2$ = <b>0.154</b> |
| Time × Diet           | F(3.40,95.20)=0.981            | p=0.412        | partial $\eta^2$ =0.034         |
| Time × Context        | F(3.40,95.20)=1.256            | p=0.294        | partial $\eta^2$ =0.043         |
| Diet × Context        | F(1,28)=0.482                  | p=0.482        | partial $\eta^2$ =0.017         |
| Time × Diet × Context | F(3.40,95.20)=0.546            | p=0.674        | partial $\eta^2$ =0.019         |

---
