# Supplementary material for: Generalization of contextual fear is sex-specifically affected by high salt intake
Source: PubMed Central journal article supplement (PMC10343085; doi:10.1371/journal.pone.0286221), 2023-07-13
Supplement: pone.0286221.s017.pdf [file pone.0286221.s017.pdf]

## Supplemental Material for

Generalization of contextual fear is sex-specifically affected by high salt intake

Jasmin N. Beaver<sup>1,2</sup>, Brady L. Weber<sup>1,2</sup>, Matthew T. Ford<sup>1</sup>, Anna E. Anello<sup>1,2</sup>, Kaden M. Ruffin<sup>1</sup>,  
Sarah K. Kassis<sup>1,2</sup>, T. Lee Gilman<sup>1,2,3\*</sup>

<sup>1</sup>Department of Psychological Sciences, Kent State University, Kent, Ohio, United States of America

<sup>2</sup>Brain Health Research Institute, Kent State University, Kent, Ohio, United States of America

<sup>3</sup>Healthy Communities Research Institute, Kent State University, Kent, Ohio, United States of America

\*Corresponding Author

Email: [lgilman1@kent.edu](mailto:lgilman1@kent.edu) (TLG)

**S17 Table. Three-way repeated measures ANOVAs on weekly body weight change for context fear conditioned mice across Experiments.**

S17A Table

| <b>Females</b>        | <b>Experiment 1 – Body Weight Change</b> |                |                                 |
|-----------------------|------------------------------------------|----------------|---------------------------------|
| Diet                  | F(1,30)=1.586                            | p=0.218        | partial $\eta^2$ =0.050         |
| Context               | F(1,30)=0.731                            | p=0.399        | partial $\eta^2$ =0.024         |
| Time                  | F(1.73,51.83)=82.14                      | p<0.001        | partial $\eta^2$ =0.732         |
| Time × Diet           | F(1.73,51.83)=5.233                      | <b>p=0.011</b> | partial $\eta^2$ = <b>0.149</b> |
| Time × Context        | F(1.73,51.83)=3.272                      | p=0.053        | partial $\eta^2$ =0.098         |
| Diet × Context        | F(1,30)=0.675                            | p=0.418        | partial $\eta^2$ =0.022         |
| Time × Diet × Context | F(1.73,51.83)=0.437                      | p=0.619        | partial $\eta^2$ =0.014         |

S17B Table

| <b>Males</b>          | <b>Experiment 1 – Body Weight Change</b> |                |                                 |
|-----------------------|------------------------------------------|----------------|---------------------------------|
| Diet                  | F(1,29)=0.281                            | p=0.600        | partial $\eta^2$ =0.010         |
| Context               | F(1,29)=0.998                            | p=0.326        | partial $\eta^2$ =0.033         |
| Time                  | F(1.86,53.91)=30.34                      | p<0.001        | partial $\eta^2$ =0.511         |
| Time × Diet           | F(1.86,53.91)=0.330                      | p=0.705        | partial $\eta^2$ =0.011         |
| Time × Context        | F(1.86,53.91)=0.308                      | p=0.720        | partial $\eta^2$ =0.011         |
| Diet × Context        | F(1,29)=0.294                            | p=0.592        | partial $\eta^2$ =0.010         |
| Time × Diet × Context | F(1.86,53.91)=3.318                      | <b>p=0.047</b> | partial $\eta^2$ = <b>0.103</b> |

S17C Table

| <b>Females</b>        | <b>Experiment 2 – Body Weight Change</b> |                   |                                 |
|-----------------------|------------------------------------------|-------------------|---------------------------------|
| Diet                  | F(1,30)=6.764                            | <b>p=0.014</b>    | partial $\eta^2$ = <b>0.184</b> |
| Context               | F(1,30)=1.677                            | p=0.205           | partial $\eta^2$ =0.053         |
| Time                  | F(4.06,121.8)=60.14                      | <b>p&lt;0.001</b> | partial $\eta^2$ = <b>0.667</b> |
| Time × Diet           | F(4.06,121.8)=1.821                      | p=0.128           | partial $\eta^2$ =0.057         |
| Time × Context        | F(4.06,121.8)=0.594                      | p=0.670           | partial $\eta^2$ =0.019         |
| Diet × Context        | F(1,30)=0.216                            | p=0.646           | partial $\eta^2$ =0.007         |
| Time × Diet × Context | F(4.06,121.8)=0.017                      | p=0.999           | partial $\eta^2$ =0.001         |

S17D Table

| <b>Males</b>   | <b>Experiment 2 – Body Weight Change</b> |                   |                                 |
|----------------|------------------------------------------|-------------------|---------------------------------|
| Diet           | F(1,32)=2.211                            | p=0.147           | partial $\eta^2$ =0.065         |
| Context        | F(1,32)=0.806                            | p=0.376           | partial $\eta^2$ =0.025         |
| Time           | F(4.63,148.3)=7.269                      | <b>p&lt;0.001</b> | partial $\eta^2$ = <b>0.185</b> |
| Time × Diet    | F(4.63,148.3)=2.292                      | p=0.053           | partial $\eta^2$ =0.067         |
| Time × Context | F(4.63,148.3)=0.580                      | p=0.702           | partial $\eta^2$ =0.018         |

|                       |                     |         |                        |
|-----------------------|---------------------|---------|------------------------|
| Diet × Context        | F(1,32)=0.257       | p=0.616 | partial $\eta^2=0.008$ |
| Time × Diet × Context | F(4.63,148.3)=1.694 | p=0.145 | partial $\eta^2=0.050$ |

---

S17E Table

| <b>Females</b>        | <b>Experiment 3 – Body Weight Change</b> |                |                        |
|-----------------------|------------------------------------------|----------------|------------------------|
| Diet                  | F(1,30)=1.695                            | p=0.203        | partial $\eta^2=0.053$ |
| Context               | F(1,30)=0.127                            | p=0.724        | partial $\eta^2=0.004$ |
| Time                  | F(4.26,127.8)=74.03                      | p<0.001        | partial $\eta^2=0.712$ |
| Time × Diet           | F(4.26,127.8)=3.422                      | <b>p=0.009</b> | partial $\eta^2=0.102$ |
| Time × Context        | F(4.26,127.8)=0.055                      | p=0.996        | partial $\eta^2=0.002$ |
| Diet × Context        | F(1,30)=1.156                            | p=0.291        | partial $\eta^2=0.037$ |
| Time × Diet × Context | F(4.26,127.8)=2.173                      | p=0.072        | partial $\eta^2=0.068$ |

---

S17F Table

| <b>Males</b>          | <b>Experiment 3 – Body Weight Change</b> |                   |                        |
|-----------------------|------------------------------------------|-------------------|------------------------|
| Diet                  | F(1,28)=1.021                            | p=0.321           | partial $\eta^2=0.035$ |
| Context               | F(1,28)=0.231                            | p=0.634           | partial $\eta^2=0.008$ |
| Time                  | F(3.86,107.9)=6.806                      | <b>p&lt;0.001</b> | partial $\eta^2=0.196$ |
| Time × Diet           | F(3.86,107.9)=1.575                      | p=0.188           | partial $\eta^2=0.053$ |
| Time × Context        | F(3.86,107.9)=1.271                      | p=0.287           | partial $\eta^2=0.043$ |
| Diet × Context        | F(1,28)=0.002                            | p=0.962           | partial $\eta^2=0.000$ |
| Time × Diet × Context | F(3.86,107.9)=1.244                      | p=0.297           | partial $\eta^2=0.043$ |

---
