# Supplementary material for: Generalization of contextual fear is sex-specifically affected by high salt intake
Source: PubMed Central journal article supplement (PMC10343085; doi:10.1371/journal.pone.0286221), 2023-07-13
Supplement: pone.0286221.s018.pdf [file pone.0286221.s018.pdf]

## Supplemental Material for

Generalization of contextual fear is sex-specifically affected by high salt intake

Jasmin N. Beaver<sup>1,2</sup>, Brady L. Weber<sup>1,2</sup>, Matthew T. Ford<sup>1</sup>, Anna E. Anello<sup>1,2</sup>, Kaden M. Ruffin<sup>1</sup>, Sarah K. Kassis<sup>1,2</sup>, T. Lee Gilman<sup>1,2,3\*</sup>

<sup>1</sup>Department of Psychological Sciences, Kent State University, Kent, Ohio, United States of America

<sup>2</sup>Brain Health Research Institute, Kent State University, Kent, Ohio, United States of America

<sup>3</sup>Healthy Communities Research Institute, Kent State University, Kent, Ohio, United States of America

\*Corresponding Author

Email: [lgilman1@kent.edu](mailto:lgilman1@kent.edu) (TLG)

**S18 Table. Three-way repeated measures ANOVAs on twice weekly body weight measurements of context fear conditioned mice across Experiments.**

S18A Table

| <b>Females</b>        | <b>Experiment 1 – Body Weight</b> |                   |                                 |
|-----------------------|-----------------------------------|-------------------|---------------------------------|
| Diet                  | F(1,30)=0.388                     | p=0.538           | partial $\eta^2$ =0.013         |
| Context               | F(1,30)=2.823                     | p=0.103           | partial $\eta^2$ =0.086         |
| Time                  | F(3.24,97.25)=30.28               | <b>p&lt;0.001</b> | partial $\eta^2$ = <b>0.502</b> |
| Time × Diet           | F(3.24,97.25)=1.859               | p=0.137           | partial $\eta^2$ =0.058         |
| Time × Context        | F(3.24,97.25)=0.767               | p=0.524           | partial $\eta^2$ =0.025         |
| Diet × Context        | F(1,30)=0.015                     | p=0.904           | partial $\eta^2$ =0.000         |
| Time × Diet × Context | F(3.24,97.25)=1.035               | p=0.384           | partial $\eta^2$ =0.033         |

S18B Table

| <b>Males</b>          | <b>Experiment 1 – Body Weight</b> |                   |                                 |
|-----------------------|-----------------------------------|-------------------|---------------------------------|
| Diet                  | F(1,29)=0.316                     | p=0.579           | partial $\eta^2$ =0.011         |
| Context               | F(1,29)=0.061                     | p=0.806           | partial $\eta^2$ =0.002         |
| Time                  | F(2.43,70.56)=9.973               | <b>p&lt;0.001</b> | partial $\eta^2$ = <b>0.256</b> |
| Time × Diet           | F(2.43,70.56)=0.357               | p=0.742           | partial $\eta^2$ =0.012         |
| Time × Context        | F(2.43,70.56)=1.979               | p=0.137           | partial $\eta^2$ =0.064         |
| Diet × Context        | F(1,29)=0.076                     | p=0.785           | partial $\eta^2$ =0.003         |
| Time × Diet × Context | F(2.43,70.56)=0.962               | p=0.401           | partial $\eta^2$ =0.032         |

S18C Table

| <b>Females</b>        | <b>Experiment 2 – Body Weight</b> |                |                                 |
|-----------------------|-----------------------------------|----------------|---------------------------------|
| Diet                  | F(1,30)=0.074                     | p=0.787        | partial $\eta^2$ =0.002         |
| Context               | F(1,30)=0.369                     | p=0.548        | partial $\eta^2$ =0.012         |
| Time                  | F(4.96,148.9)=40.23               | p<0.001        | partial $\eta^2$ =0.573         |
| Time × Diet           | F(4.96,148.9)=2.823               | <b>p=0.018</b> | partial $\eta^2$ = <b>0.086</b> |
| Time × Context        | F(4.96,148.9)=1.563               | p=0.175        | partial $\eta^2$ =0.050         |
| Diet × Context        | F(1,30)=1.463                     | p=0.236        | partial $\eta^2$ =0.046         |
| Time × Diet × Context | F(4.96,148.9)=0.356               | p=0.876        | partial $\eta^2$ =0.012         |

S18D Table

| <b>Males</b>   | <b>Experiment 2 – Body Weight</b> |                |                                 |
|----------------|-----------------------------------|----------------|---------------------------------|
| Diet           | F(1,32)=0.006                     | p=0.937        | partial $\eta^2$ =0.000         |
| Context        | F(1,32)=0.063                     | p=0.803        | partial $\eta^2$ =0.002         |
| Time           | F(2.28,73.02)=4.422               | <b>p=0.012</b> | partial $\eta^2$ = <b>0.121</b> |
| Time × Diet    | F(2.28,73.02)=2.370               | p=0.093        | partial $\eta^2$ =0.069         |
| Time × Context | F(2.28,73.02)=0.784               | p=0.476        | partial $\eta^2$ =0.024         |

|                       |                     |         |                         |
|-----------------------|---------------------|---------|-------------------------|
| Diet × Context        | F(1,32)=1.073       | p=0.308 | partial $\eta^2$ =0.032 |
| Time × Diet × Context | F(2.28,73.02)=0.383 | p=0.710 | partial $\eta^2$ =0.012 |

---

S18E Table

| <b>Females</b>        | <b>Experiment 3 – Body Weight</b> |                   |                                 |
|-----------------------|-----------------------------------|-------------------|---------------------------------|
| Diet                  | F(1,30)=2.455                     | p=0.128           | partial $\eta^2$ =0.076         |
| Context               | F(1,30)=3.497                     | p=0.071           | partial $\eta^2$ =0.104         |
| Time                  | F(4.57,137.0)=51.87               | <b>p&lt;0.001</b> | partial $\eta^2$ = <b>0.634</b> |
| Time × Diet           | F(4.57,137.0)=1.496               | p=0.200           | partial $\eta^2$ =0.047         |
| Time × Context        | F(4.57,137.0)=0.288               | p=0.906           | partial $\eta^2$ =0.010         |
| Diet × Context        | F(1,30)=2.245                     | p=0.145           | partial $\eta^2$ =0.070         |
| Time × Diet × Context | F(4.57,137.0)=1.660               | p=0.154           | partial $\eta^2$ =0.052         |

---

S18F Table

| <b>Males</b>          | <b>Experiment 3 – Body Weight</b> |                |                                 |
|-----------------------|-----------------------------------|----------------|---------------------------------|
| Diet                  | F(1,28)=0.120                     | p=0.732        | partial $\eta^2$ =0.004         |
| Context               | F(1,28)=1.016                     | p=0.322        | partial $\eta^2$ =0.035         |
| Time                  | F(2.67,74.86)=12.22               | p<0.001        | partial $\eta^2$ =0.304         |
| Time × Diet           | F(2.67,74.86)=3.019               | <b>p=0.040</b> | partial $\eta^2$ = <b>0.097</b> |
| Time × Context        | F(2.67,74.86)=0.426               | p=0.713        | partial $\eta^2$ =0.015         |
| Diet × Context        | F(1,28)=0.150                     | p=0.701        | partial $\eta^2$ =0.005         |
| Time × Diet × Context | F(2.67,74.86)=0.422               | p=0.715        | partial $\eta^2$ =0.015         |

---
