# Supplementary material for: Generalization of contextual fear is sex-specifically affected by high salt intake
Source: PubMed Central journal article supplement (PMC10343085; doi:10.1371/journal.pone.0286221), 2023-07-13
Supplement: pone.0286221.s019.pdf [file pone.0286221.s019.pdf]

## Supplemental Material for

Generalization of contextual fear is sex-specifically affected by high salt intake

Jasmin N. Beaver<sup>1,2</sup>, Brady L. Weber<sup>1,2</sup>, Matthew T. Ford<sup>1</sup>, Anna E. Anello<sup>1,2</sup>, Kaden M. Ruffin<sup>1</sup>, Sarah K. Kassis<sup>1,2</sup>, T. Lee Gilman<sup>1,2,3\*</sup>

<sup>1</sup>Department of Psychological Sciences, Kent State University, Kent, Ohio, United States of America

<sup>2</sup>Brain Health Research Institute, Kent State University, Kent, Ohio, United States of America

<sup>3</sup>Healthy Communities Research Institute, Kent State University, Kent, Ohio, United States of America

\*Corresponding Author

Email: [lgilman1@kent.edu](mailto:lgilman1@kent.edu) (TLG)

**S19 Table. Three-way repeated measures ANOVAs on weekly average water consumption per day for control no shock mice across Experiments.**

S19A Table

| <b>Experiment 1</b> | <b>Water/day</b>    |                   |                                 |
|---------------------|---------------------|-------------------|---------------------------------|
| Sex                 | F(1,31)=3.245       | p=0.081           | partial $\eta^2$ =0.095         |
| Diet                | F(1,31)=50.99       | <b>p&lt;0.001</b> | partial $\eta^2$ = <b>0.622</b> |
| Time                | F(1.67,51.69)=3.219 | p=0.057           | partial $\eta^2$ =0.094         |
| Time × Sex          | F(1.67,51.69)=4.157 | <b>p=0.027</b>    | partial $\eta^2$ = <b>0.118</b> |
| Time × Diet         | F(1.67,51.69)=1.459 | p=0.242           | partial $\eta^2$ =0.045         |
| Sex × Diet          | F(1,31)=3.868       | p=0.058           | partial $\eta^2$ =0.111         |
| Time × Sex × Diet   | F(1.67,51.69)=0.910 | p=0.393           | partial $\eta^2$ =0.029         |

S19B Table

| <b>Experiment 2</b> | <b>Water/day</b>    |                   |                                 |
|---------------------|---------------------|-------------------|---------------------------------|
| Sex                 | F(1,29)=9.248       | p=0.005           | partial $\eta^2$ =0.242         |
| Diet                | F(1,29)=204.6       | p<0.001           | partial $\eta^2$ =0.876         |
| Time                | F(3.98,115.4)=17.93 | p<0.001           | partial $\eta^2$ =0.382         |
| Time × Sex          | F(3.98,115.4)=6.510 | <b>p&lt;0.001</b> | partial $\eta^2$ = <b>0.183</b> |
| Time × Diet         | F(3.98,115.4)=5.307 | <b>p&lt;0.001</b> | partial $\eta^2$ = <b>0.155</b> |
| Sex × Diet          | F(1,29)=0.231       | p=0.635           | partial $\eta^2$ =0.008         |
| Time × Sex × Diet   | F(3.98,115.4)=0.084 | p=0.987           | partial $\eta^2$ =0.003         |

S19C Table

| <b>Experiment 3</b> | <b>Water/day</b>    |                |                                 |
|---------------------|---------------------|----------------|---------------------------------|
| Sex                 | F(1,28)=0.188       | p=0.668        | partial $\eta^2$ =0.007         |
| Diet                | F(1,28)=37.59       | p<0.001        | partial $\eta^2$ =0.573         |
| Time                | F(3.47,97.21)=5.224 | p=0.001        | partial $\eta^2$ =0.157         |
| Time × Sex          | F(3.47,97.21)=0.962 | p=0.423        | partial $\eta^2$ =0.033         |
| Time × Diet         | F(3.47,97.21)=3.541 | p=0.013        | partial $\eta^2$ =0.112         |
| Sex × Diet          | F(1,28)=3.551       | p=0.070        | partial $\eta^2$ =0.113         |
| Time × Sex × Diet   | F(3.47,97.21)=3.387 | <b>p=0.016</b> | partial $\eta^2$ = <b>0.108</b> |
