# Supplementary material for: Generalization of contextual fear is sex-specifically affected by high salt intake
Source: PubMed Central journal article supplement (PMC10343085; doi:10.1371/journal.pone.0286221), 2023-07-13
Supplement: pone.0286221.s020.pdf [file pone.0286221.s020.pdf]

## Supplemental Material for

Generalization of contextual fear is sex-specifically affected by high salt intake

Jasmin N. Beaver<sup>1,2</sup>, Brady L. Weber<sup>1,2</sup>, Matthew T. Ford<sup>1</sup>, Anna E. Anello<sup>1,2</sup>, Kaden M. Ruffin<sup>1</sup>,  
Sarah K. Kassis<sup>1,2</sup>, T. Lee Gilman<sup>1,2,3\*</sup>

<sup>1</sup>Department of Psychological Sciences, Kent State University, Kent, Ohio, United States of America

<sup>2</sup>Brain Health Research Institute, Kent State University, Kent, Ohio, United States of America

<sup>3</sup>Healthy Communities Research Institute, Kent State University, Kent, Ohio, United States of America

\*Corresponding Author

Email: [lgilman1@kent.edu](mailto:lgilman1@kent.edu) (TLG)

**S20 Table. Three-way repeated measures ANOVAs on weekly average food consumption per day for control no shock mice across Experiments.**

S20A Table

| <b>Experiment 1</b> | <b>Food/day</b>     |                   |                        |
|---------------------|---------------------|-------------------|------------------------|
| Sex                 | F(1,31)=17.58       | <b>p&lt;0.001</b> | partial $\eta^2=0.362$ |
| Diet                | F(1,31)=8.329       | <b>p=0.007</b>    | partial $\eta^2=0.212$ |
| Time                | F(1.56,48.19)=0.003 | p=0.990           | partial $\eta^2=0.000$ |
| Time × Sex          | F(1.56,48.19)=2.401 | p=0.113           | partial $\eta^2=0.072$ |
| Time × Diet         | F(1.56,48.19)=0.223 | p=0.745           | partial $\eta^2=0.007$ |
| Sex × Diet          | F(1,31)=0.130       | p=0.721           | partial $\eta^2=0.004$ |
| Time × Sex × Diet   | F(1.56,48.19)=1.258 | p=0.286           | partial $\eta^2=0.039$ |

S20B Table

| <b>Experiment 2</b> | <b>Food/day</b>     |                   |                        |
|---------------------|---------------------|-------------------|------------------------|
| Sex                 | F(1,29)=22.47       | <b>p&lt;0.001</b> | partial $\eta^2=0.437$ |
| Diet                | F(1,29)=15.77       | p<0.001           | partial $\eta^2=0.352$ |
| Time                | F(3.08,89.34)=2.245 | p=0.087           | partial $\eta^2=0.072$ |
| Time × Sex          | F(3.08,89.34)=0.476 | p=0.705           | partial $\eta^2=0.016$ |
| Time × Diet         | F(3.08,89.34)=3.463 | <b>p=0.019</b>    | partial $\eta^2=0.107$ |
| Sex × Diet          | F(1,29)=0.969       | p=0.333           | partial $\eta^2=0.032$ |
| Time × Sex × Diet   | F(3.08,89.34)=0.617 | p=0.610           | partial $\eta^2=0.021$ |

S20C Table

| <b>Experiment 3</b> | <b>Food/day</b>     |                   |                        |
|---------------------|---------------------|-------------------|------------------------|
| Sex                 | F(1,28)=24.30       | <b>p&lt;0.001</b> | partial $\eta^2=0.465$ |
| Diet                | F(1,28)=7.983       | <b>p=0.009</b>    | partial $\eta^2=0.222$ |
| Time                | F(2.76,77.39)=1.692 | p=0.179           | partial $\eta^2=0.057$ |
| Time × Sex          | F(2.76,77.39)=1.523 | p=0.218           | partial $\eta^2=0.052$ |
| Time × Diet         | F(2.76,77.39)=1.496 | p=0.224           | partial $\eta^2=0.051$ |
| Sex × Diet          | F(1,28)=0.735       | p=0.398           | partial $\eta^2=0.026$ |
| Time × Sex × Diet   | F(2.76,77.39)=1.174 | p=0.324           | partial $\eta^2=0.040$ |
