# Supplementary material for: Generalization of contextual fear is sex-specifically affected by high salt intake
Source: PubMed Central journal article supplement (PMC10343085; doi:10.1371/journal.pone.0286221), 2023-07-13
Supplement: pone.0286221.s021.pdf [file pone.0286221.s021.pdf]

## Supplemental Material for

Generalization of contextual fear is sex-specifically affected by high salt intake

Jasmin N. Beaver<sup>1,2</sup>, Brady L. Weber<sup>1,2</sup>, Matthew T. Ford<sup>1</sup>, Anna E. Anello<sup>1,2</sup>, Kaden M. Ruffin<sup>1</sup>,  
Sarah K. Kassis<sup>1,2</sup>, T. Lee Gilman<sup>1,2,3\*</sup>

<sup>1</sup>Department of Psychological Sciences, Kent State University, Kent, Ohio, United States of America

<sup>2</sup>Brain Health Research Institute, Kent State University, Kent, Ohio, United States of America

<sup>3</sup>Healthy Communities Research Institute, Kent State University, Kent, Ohio, United States of America

\*Corresponding Author

Email: [lgilman1@kent.edu](mailto:lgilman1@kent.edu) (TLG)

**S21 Table. Three-way repeated measures ANOVAs on weekly body weight changes for control no shock mice across Experiments.**

S21A Table

| <b>Experiment 1</b> | <b>Body Weight Change</b> |                   |                                 |
|---------------------|---------------------------|-------------------|---------------------------------|
| Sex                 | F(1,31)=0.236             | p=0.631           | partial $\eta^2$ =0.008         |
| Diet                | F(1,31)=0.443             | p=0.511           | partial $\eta^2$ =0.014         |
| Time                | F(1.84,42.05)=59.12       | <b>p&lt;0.001</b> | partial $\eta^2$ = <b>0.656</b> |
| Time × Sex          | F(1.84,42.05)=0.032       | p=0.960           | partial $\eta^2$ =0.001         |
| Time × Diet         | F(1.84,42.05)=1.319       | p=0.274           | partial $\eta^2$ =0.041         |
| Sex × Diet          | F(1,31)=6.755             | <b>p=0.014</b>    | partial $\eta^2$ = <b>0.179</b> |
| Time × Sex × Diet   | F(1.84,42.05)=0.491       | p=0.599           | partial $\eta^2$ =0.016         |

S21B Table

| <b>Experiment 2</b> | <b>Body Weight Change</b> |                |                                 |
|---------------------|---------------------------|----------------|---------------------------------|
| Sex                 | F(1,29)=0.966             | p=0.334        | partial $\eta^2$ =0.032         |
| Diet                | F(1,29)=1.596             | p=0.216        | partial $\eta^2$ =0.052         |
| Time                | F(4.00,115.9)=29.74       | p<0.001        | partial $\eta^2$ =0.506         |
| Time × Sex          | F(4.00,115.9)=4.637       | <b>p=0.002</b> | partial $\eta^2$ = <b>0.138</b> |
| Time × Diet         | F(4.00,115.9)=3.270       | <b>p=0.014</b> | partial $\eta^2$ = <b>0.101</b> |
| Sex × Diet          | F(1,29)=0.562             | p=0.460        | partial $\eta^2$ =0.019         |
| Time × Sex × Diet   | F(4.00,115.9)=0.530       | p=0.713        | partial $\eta^2$ =0.018         |

S21C Table

| <b>Experiment 3</b> | <b>Body Weight Change</b> |                |                                 |
|---------------------|---------------------------|----------------|---------------------------------|
| Sex                 | F(1,28)=6.100             | p=0.020        | partial $\eta^2$ =0.179         |
| Diet                | F(1,28)=3.939             | p=0.057        | partial $\eta^2$ =0.123         |
| Time                | F(3.14,87.80)=18.35       | p<0.001        | partial $\eta^2$ =0.396         |
| Time × Sex          | F(3.14,87.80)=4.494       | <b>p=0.005</b> | partial $\eta^2$ = <b>0.138</b> |
| Time × Diet         | F(3.14,87.80)=4.231       | <b>p=0.007</b> | partial $\eta^2$ = <b>0.131</b> |
| Sex × Diet          | F(1,28)=0.136             | p=0.715        | partial $\eta^2$ =0.005         |
| Time × Sex × Diet   | F(3.14,87.80)=1.041       | p=0.380        | partial $\eta^2$ =0.036         |
