# Supplementary material for: Generalization of contextual fear is sex-specifically affected by high salt intake
Source: PubMed Central journal article supplement (PMC10343085; doi:10.1371/journal.pone.0286221), 2023-07-13
Supplement: pone.0286221.s022.pdf [file pone.0286221.s022.pdf]

## Supplemental Material for

Generalization of contextual fear is sex-specifically affected by high salt intake

Jasmin N. Beaver<sup>1,2</sup>, Brady L. Weber<sup>1,2</sup>, Matthew T. Ford<sup>1</sup>, Anna E. Anello<sup>1,2</sup>, Kaden M. Ruffin<sup>1</sup>,  
Sarah K. Kassis<sup>1,2</sup>, T. Lee Gilman<sup>1,2,3\*</sup>

<sup>1</sup>Department of Psychological Sciences, Kent State University, Kent, Ohio, United States of America

<sup>2</sup>Brain Health Research Institute, Kent State University, Kent, Ohio, United States of America

<sup>3</sup>Healthy Communities Research Institute, Kent State University, Kent, Ohio, United States of America

\*Corresponding Author

Email: [lgilman1@kent.edu](mailto:lgilman1@kent.edu) (TLG)

**S22 Table. Three-way repeated measures ANOVAs on twice weekly body weights of control no shock mice across Experiments.**

S22A Table

| <b>Experiment 1</b> | <b>Body Weight</b>  |                |                                 |
|---------------------|---------------------|----------------|---------------------------------|
| Sex                 | F(1,31)=25.84       | p<0.001        | partial $\eta^2$ =0.455         |
| Diet                | F(1,31)=0.018       | p=0.893        | partial $\eta^2$ =0.001         |
| Time                | F(2.31,71.60)=21.32 | p<0.001        | partial $\eta^2$ =0.408         |
| Time × Sex          | F(2.31,71.60)=0.174 | p=0.869        | partial $\eta^2$ =0.006         |
| Time × Diet         | F(2.31,71.60)=0.667 | p=0.537        | partial $\eta^2$ =0.021         |
| Sex × Diet          | F(1,31)=0.155       | p=0.697        | partial $\eta^2$ =0.179         |
| Time × Sex × Diet   | F(2.31,71.60)=3.707 | <b>p=0.024</b> | partial $\eta^2$ = <b>0.107</b> |

S22B Table

| <b>Experiment 2</b> | <b>Body Weight</b>  |                |                                 |
|---------------------|---------------------|----------------|---------------------------------|
| Sex                 | F(1,29)=38.62       | p<0.001        | partial $\eta^2$ =0.571         |
| Diet                | F(1,29)=2.447       | p=0.129        | partial $\eta^2$ =0.078         |
| Time                | F(3.30,95.56)=13.28 | p<0.001        | partial $\eta^2$ =0.314         |
| Time × Sex          | F(3.30,95.56)=4.031 | <b>p=0.008</b> | partial $\eta^2$ = <b>0.122</b> |
| Time × Diet         | F(3.30,95.56)=2.077 | p=0.102        | partial $\eta^2$ =0.067         |
| Sex × Diet          | F(1,29)=0.418       | p=0.523        | partial $\eta^2$ =0.014         |
| Time × Sex × Diet   | F(3.30,95.56)=0.961 | p=0.421        | partial $\eta^2$ =0.032         |

S22C Table

| <b>Experiment 3</b> | <b>Body Weight</b>  |                |                                 |
|---------------------|---------------------|----------------|---------------------------------|
| Sex                 | F(1,28)=59.03       | p<0.001        | partial $\eta^2$ =0.678         |
| Diet                | F(1,28)=1.095       | p=0.304        | partial $\eta^2$ =0.038         |
| Time                | F(2.64,73.82)=11.92 | p<0.001        | partial $\eta^2$ =0.299         |
| Time × Sex          | F(2.64,73.82)=3.879 | <b>p=0.016</b> | partial $\eta^2$ = <b>0.122</b> |
| Time × Diet         | F(2.64,73.82)=2.216 | p=0.101        | partial $\eta^2$ =0.073         |
| Sex × Diet          | F(1,28)=0.039       | p=0.845        | partial $\eta^2$ =0.001         |
| Time × Sex × Diet   | F(2.64,73.82)=0.564 | p=0.618        | partial $\eta^2$ =0.020         |
