# Supplementary material for: Generalization of contextual fear is sex-specifically affected by high salt intake
Source: PubMed Central journal article supplement (PMC10343085; doi:10.1371/journal.pone.0286221), 2023-07-13
Supplement: pone.0286221.s023.pdf [file pone.0286221.s023.pdf]

## Supplemental Material for

Generalization of contextual fear is sex-specifically affected by high salt intake

Jasmin N. Beaver<sup>1,2</sup>, Brady L. Weber<sup>1,2</sup>, Matthew T. Ford<sup>1</sup>, Anna E. Anello<sup>1,2</sup>, Kaden M. Ruffin<sup>1</sup>,  
Sarah K. Kassis<sup>1,2</sup>, T. Lee Gilman<sup>1,2,3\*</sup>

<sup>1</sup>Department of Psychological Sciences, Kent State University, Kent, Ohio, United States of America

<sup>2</sup>Brain Health Research Institute, Kent State University, Kent, Ohio, United States of America

<sup>3</sup>Healthy Communities Research Institute, Kent State University, Kent, Ohio, United States of America

\*Corresponding Author

Email: [lgilman1@kent.edu](mailto:lgilman1@kent.edu) (TLG)

**S23 Table. Three-way repeated measures ANOVAs on weekly average NaCl consumed per day by context fear conditioned mice across Experiments.**

S23A Table

| <b>Females</b>        | <b>Experiment 1 – NaCl/day</b> |                   |                                 |
|-----------------------|--------------------------------|-------------------|---------------------------------|
| Diet                  | F(1,30)=635.7                  | <b>p&lt;0.001</b> | partial $\eta^2$ = <b>0.955</b> |
| Context               | F(1,30)=0.004                  | p=0.951           | partial $\eta^2$ =0.000         |
| Time                  | F(1.61,48.36)=0.846            | p=0.413           | partial $\eta^2$ =0.027         |
| Time × Diet           | F(1.61,48.36)=0.834            | p=0.418           | partial $\eta^2$ =0.027         |
| Time × Context        | F(1.61,48.36)=0.698            | p=0.473           | partial $\eta^2$ =0.023         |
| Diet × Context        | F(1,30)=0.029                  | p=0.866           | partial $\eta^2$ =0.001         |
| Time × Diet × Context | F(1.61,48.36)=0.627            | p=0.505           | partial $\eta^2$ =0.020         |

S23B Table

| <b>Males</b>          | <b>Experiment 1 – NaCl/day</b> |                   |                                 |
|-----------------------|--------------------------------|-------------------|---------------------------------|
| Diet                  | F(1,29)=784.5                  | <b>p&lt;0.001</b> | partial $\eta^2$ = <b>0.964</b> |
| Context               | F(1,29)=0.017                  | p=0.899           | partial $\eta^2$ =0.001         |
| Time                  | F(1.64,47.50)=0.759            | p=0.449           | partial $\eta^2$ =0.025         |
| Time × Diet           | F(1.64,47.50)=0.377            | p=0.646           | partial $\eta^2$ =0.013         |
| Time × Context        | F(1.64,47.50)=0.312            | p=0.690           | partial $\eta^2$ =0.011         |
| Diet × Context        | F(1,29)=0.014                  | p=0.906           | partial $\eta^2$ =0.000         |
| Time × Diet × Context | F(1.64,47.50)=0.497            | p=0.574           | partial $\eta^2$ =0.017         |

S23C Table

| <b>Females</b>        | <b>Experiment 2 – NaCl/day</b> |                |                                 |
|-----------------------|--------------------------------|----------------|---------------------------------|
| Diet                  | F(1,30)=1412                   | p<0.001        | partial $\eta^2$ =0.979         |
| Context               | F(1,30)=0.000                  | p=0.988        | partial $\eta^2$ =0.000         |
| Time                  | F(3.22,96.53)=6.807            | p<0.001        | partial $\eta^2$ =0.185         |
| Time × Diet           | F(3.22,96.53)=4.373            | <b>p=0.005</b> | partial $\eta^2$ = <b>0.127</b> |
| Time × Context        | F(3.22,96.53)=0.929            | p=0.435        | partial $\eta^2$ =0.030         |
| Diet × Context        | F(1,30)=0.002                  | p=0.962        | partial $\eta^2$ =0.000         |
| Time × Diet × Context | F(3.22,96.53)=0.760            | p=0.528        | partial $\eta^2$ =0.025         |

S23D Table

| <b>Males</b>   | <b>Experiment 2 – NaCl/day</b> |                |                                 |
|----------------|--------------------------------|----------------|---------------------------------|
| Diet           | F(1,32)=2164                   | p<0.001        | partial $\eta^2$ =0.985         |
| Context        | F(1,32)=0.904                  | p=0.349        | partial $\eta^2$ =0.027         |
| Time           | F(4.11,131.4)=6.013            | p<0.001        | partial $\eta^2$ =0.158         |
| Time × Diet    | F(4.11,131.4)=4.350            | <b>p=0.002</b> | partial $\eta^2$ = <b>0.120</b> |
| Time × Context | F(4.11,131.4)=0.943            | p=0.443        | partial $\eta^2$ =0.029         |

|                       |                     |         |                        |
|-----------------------|---------------------|---------|------------------------|
| Diet × Context        | F(1,32)=1.057       | p=0.312 | partial $\eta^2=0.032$ |
| Time × Diet × Context | F(4.11,131.4)=1.003 | p=0.410 | partial $\eta^2=0.030$ |

---

S23E Table

| <b>Females</b>        | <b>Experiment 3 – NaCl/day</b> |                   |                        |
|-----------------------|--------------------------------|-------------------|------------------------|
| Diet                  | F(1,30)=621.9                  | <b>p&lt;0.001</b> | partial $\eta^2=0.954$ |
| Context               | F(1,30)=0.301                  | p=0.587           | partial $\eta^2=0.010$ |
| Time                  | F(2.27,68.08)=1.194            | p=0.313           | partial $\eta^2=0.038$ |
| Time × Diet           | F(2.27,68.08)=0.710            | p=0.512           | partial $\eta^2=0.023$ |
| Time × Context        | F(2.27,68.08)=0.192            | p=0.852           | partial $\eta^2=0.006$ |
| Diet × Context        | F(1,30)=0.177                  | p=0.677           | partial $\eta^2=0.006$ |
| Time × Diet × Context | F(2.27,68.08)=0.190            | p=0.853           | partial $\eta^2=0.006$ |

---

S23F Table

| <b>Males</b>          | <b>Experiment 3 – NaCl/day</b> |                   |                        |
|-----------------------|--------------------------------|-------------------|------------------------|
| Diet                  | F(1,28)=398.8                  | <b>p&lt;0.001</b> | partial $\eta^2=0.934$ |
| Context               | F(1,28)=0.186                  | p=0.670           | partial $\eta^2=0.007$ |
| Time                  | F(2.94,82.41)=2.553            | p=0.062           | partial $\eta^2=0.084$ |
| Time × Diet           | F(2.94,82.41)=1.989            | p=0.123           | partial $\eta^2=0.066$ |
| Time × Context        | F(2.94,82.41)=0.723            | p=0.538           | partial $\eta^2=0.025$ |
| Diet × Context        | F(1,28)=0.244                  | p=0.625           | partial $\eta^2=0.009$ |
| Time × Diet × Context | F(2.94,82.41)=0.626            | p=0.597           | partial $\eta^2=0.022$ |

---
