# Supplementary material for: Generalization of contextual fear is sex-specifically affected by high salt intake
Source: PubMed Central journal article supplement (PMC10343085; doi:10.1371/journal.pone.0286221), 2023-07-13
Supplement: pone.0286221.s024.pdf [file pone.0286221.s024.pdf]

## Supplemental Material for

Generalization of contextual fear is sex-specifically affected by high salt intake

Jasmin N. Beaver<sup>1,2</sup>, Brady L. Weber<sup>1,2</sup>, Matthew T. Ford<sup>1</sup>, Anna E. Anello<sup>1,2</sup>, Kaden M. Ruffin<sup>1</sup>,  
Sarah K. Kassis<sup>1,2</sup>, T. Lee Gilman<sup>1,2,3\*</sup>

<sup>1</sup>Department of Psychological Sciences, Kent State University, Kent, Ohio, United States of America

<sup>2</sup>Brain Health Research Institute, Kent State University, Kent, Ohio, United States of America

<sup>3</sup>Healthy Communities Research Institute, Kent State University, Kent, Ohio, United States of America

\*Corresponding Author

Email: [lgilman1@kent.edu](mailto:lgilman1@kent.edu) (TLG)

**S24 Table. Three-way repeated measures ANOVAs on weekly average NaCl consumed as a percentage of body weight in context fear conditioned mice across Experiments.**

S24A Table

| <b>Females</b>        | <b>Experiment 1 – NaCl as % BW</b> |                   |                        |
|-----------------------|------------------------------------|-------------------|------------------------|
| Diet                  | F(1,30)=532.7                      | <b>p&lt;0.001</b> | partial $\eta^2=0.947$ |
| Context               | F(1,30)=0.408                      | p=0.528           | partial $\eta^2=0.013$ |
| Time                  | F(1.51,45.38)=2.849                | p=0.082           | partial $\eta^2=0.087$ |
| Time × Diet           | F(1.51,45.38)=2.372                | p=0.117           | partial $\eta^2=0.073$ |
| Time × Context        | F(1.51,45.38)=0.648                | p=0.487           | partial $\eta^2=0.021$ |
| Diet × Context        | F(1,30)=0.378                      | p=0.544           | partial $\eta^2=0.012$ |
| Time × Diet × Context | F(1.51,45.38)=0.578                | p=0.519           | partial $\eta^2=0.019$ |

S24B Table

| <b>Males</b>          | <b>Experiment 1 – NaCl as % BW</b> |                   |                        |
|-----------------------|------------------------------------|-------------------|------------------------|
| Diet                  | F(1,29)=496.0                      | <b>p&lt;0.001</b> | partial $\eta^2=0.945$ |
| Context               | F(1,29)=0.002                      | p=0.968           | partial $\eta^2=0.000$ |
| Time                  | F(1.75,50.83)=0.847                | p=0.421           | partial $\eta^2=0.028$ |
| Time × Diet           | F(1.75,50.83)=0.841                | p=0.424           | partial $\eta^2=0.028$ |
| Time × Context        | F(1.75,50.83)=0.937                | p=0.388           | partial $\eta^2=0.031$ |
| Diet × Context        | F(1,29)=0.005                      | p=0.944           | partial $\eta^2=0.000$ |
| Time × Diet × Context | F(1.75,50.83)=1.047                | p=0.351           | partial $\eta^2=0.035$ |

S24C Table

| <b>Females</b>        | <b>Experiment 2 – NaCl as % BW</b> |                   |                        |
|-----------------------|------------------------------------|-------------------|------------------------|
| Diet                  | F(1,30)=1804                       | <b>p&lt;0.001</b> | partial $\eta^2=0.984$ |
| Context               | F(1,30)=0.102                      | p=0.752           | partial $\eta^2=0.003$ |
| Time                  | F(3.02,90.73)=2.635                | p=0.054           | partial $\eta^2=0.081$ |
| Time × Diet           | F(3.02,90.73)=1.623                | p=0.189           | partial $\eta^2=0.051$ |
| Time × Context        | F(3.02,90.73)=1.068                | p=0.367           | partial $\eta^2=0.034$ |
| Diet × Context        | F(1,30)=0.162                      | p=0.690           | partial $\eta^2=0.005$ |
| Time × Diet × Context | F(3.02,90.73)=0.897                | p=0.447           | partial $\eta^2=0.029$ |

S24D Table

| <b>Males</b>   | <b>Experiment 2 – NaCl as % BW</b> |                   |                        |
|----------------|------------------------------------|-------------------|------------------------|
| Diet           | F(1,32)=819.4                      | <b>p&lt;0.001</b> | partial $\eta^2=0.962$ |
| Context        | F(1,32)=1.631                      | p=0.211           | partial $\eta^2=0.048$ |
| Time           | F(3.82,122.1)=4.817                | p=0.001           | partial $\eta^2=0.131$ |
| Time × Diet    | F(3.82,122.1)=3.901                | <b>p=0.006</b>    | partial $\eta^2=0.109$ |
| Time × Context | F(3.82,122.1)=0.665                | p=0.610           | partial $\eta^2=0.020$ |

Diet × Context F(1,32)=1.895 p=0.178 partial  $\eta^2$ =0.056  
 Time × Diet × Context F(3.82,122.1)=0.665 p=0.610 partial  $\eta^2$ =0.020

---

S24E Table

| <b>Females</b>        | <b>Experiment 3 – NaCl as % BW</b> |                   |                                 |
|-----------------------|------------------------------------|-------------------|---------------------------------|
| Diet                  | F(1,30)=873.8                      | <b>p&lt;0.001</b> | partial $\eta^2$ = <b>0.967</b> |
| Context               | F(1,30)=0.439                      | p=0.513           | partial $\eta^2$ =0.014         |
| Time                  | F(1.92,57.61)=1.531                | p=0.225           | partial $\eta^2$ =0.049         |
| Time × Diet           | F(1.92,57.61)=0.948                | p=0.390           | partial $\eta^2$ =0.031         |
| Time × Context        | F(1.92,57.61)=0.237                | p=0.781           | partial $\eta^2$ =0.008         |
| Diet × Context        | F(1,30)=0.621                      | p=0.437           | partial $\eta^2$ =0.020         |
| Time × Diet × Context | F(1.92,57.61)=0.197                | p=0.813           | partial $\eta^2$ =0.007         |

---

S24F Table

| <b>Males</b>          | <b>Experiment 3 – NaCl as % BW</b> |                   |                                 |
|-----------------------|------------------------------------|-------------------|---------------------------------|
| Diet                  | F(1,28)=772.2                      | <b>p&lt;0.001</b> | partial $\eta^2$ = <b>0.965</b> |
| Context               | F(1,28)=0.941                      | p=0.340           | partial $\eta^2$ =0.033         |
| Time                  | F(2.75,76.95)=3.738                | <b>p=0.017</b>    | partial $\eta^2$ = <b>0.118</b> |
| Time × Diet           | F(2.75,76.95)=2.772                | p=0.052           | partial $\eta^2$ =0.090         |
| Time × Context        | F(2.75,76.95)=0.699                | p=0.544           | partial $\eta^2$ =0.024         |
| Diet × Context        | F(1,28)=0.807                      | p=0.377           | partial $\eta^2$ =0.028         |
| Time × Diet × Context | F(2.75,76.95)=0.627                | p=0.586           | partial $\eta^2$ =0.022         |

---
