# Supplementary material for: Generalization of contextual fear is sex-specifically affected by high salt intake
Source: PubMed Central journal article supplement (PMC10343085; doi:10.1371/journal.pone.0286221), 2023-07-13
Supplement: pone.0286221.s025.pdf [file pone.0286221.s025.pdf]

## Supplemental Material for

Generalization of contextual fear is sex-specifically affected by high salt intake

Jasmin N. Beaver<sup>1,2</sup>, Brady L. Weber<sup>1,2</sup>, Matthew T. Ford<sup>1</sup>, Anna E. Anello<sup>1,2</sup>, Kaden M. Ruffin<sup>1</sup>, Sarah K. Kassis<sup>1,2</sup>, T. Lee Gilman<sup>1,2,3\*</sup>

<sup>1</sup>Department of Psychological Sciences, Kent State University, Kent, Ohio, United States of America

<sup>2</sup>Brain Health Research Institute, Kent State University, Kent, Ohio, United States of America

<sup>3</sup>Healthy Communities Research Institute, Kent State University, Kent, Ohio, United States of America

\*Corresponding Author

Email: [lgilman1@kent.edu](mailto:lgilman1@kent.edu) (TLG)

**S25 Table. Three-way repeated measures ANOVAs on weekly ratio of water to NaCl consumed in context fear conditioned mice across Experiments.**

S25A Table

| <b>Females</b>        | <b>Experiment 1 – Water:NaCl Ratio</b> |                   |                        |
|-----------------------|----------------------------------------|-------------------|------------------------|
| Diet                  | F(1,30)=158.3                          | <b>p&lt;0.001</b> | partial $\eta^2=0.841$ |
| Context               | F(1,30)=0.020                          | p=0.890           | partial $\eta^2=0.001$ |
| Time                  | F(1.86,55.66)=1.501                    | p=0.232           | partial $\eta^2=0.048$ |
| Time × Diet           | F(1.86,55.66)=1.044                    | p=0.354           | partial $\eta^2=0.034$ |
| Time × Context        | F(1.86,55.66)=0.511                    | p=0.589           | partial $\eta^2=0.017$ |
| Diet × Context        | F(1,30)=0.000                          | p=0.996           | partial $\eta^2=0.000$ |
| Time × Diet × Context | F(1.86,55.66)=0.264                    | p=0.752           | partial $\eta^2=0.009$ |

S25B Table

| <b>Males</b>          | <b>Experiment 1 – Water:NaCl Ratio</b> |                   |                        |
|-----------------------|----------------------------------------|-------------------|------------------------|
| Diet                  | F(1,26)=88.66                          | p<0.001           | partial $\eta^2=0.773$ |
| Context               | F(1,26)=0.351                          | p=0.559           | partial $\eta^2=0.013$ |
| Time                  | F(1.91,49.53)=13.16                    | p<0.001           | partial $\eta^2=0.336$ |
| Time × Diet           | F(1.91,49.53)=11.52                    | <b>p&lt;0.001</b> | partial $\eta^2=0.307$ |
| Time × Context        | F(1.91,49.53)=0.923                    | p=0.400           | partial $\eta^2=0.034$ |
| Diet × Context        | F(1,26)=0.896                          | p=0.353           | partial $\eta^2=0.033$ |
| Time × Diet × Context | F(1.91,49.53)=1.376                    | p=0.262           | partial $\eta^2=0.050$ |

S25C Table

| <b>Females</b>        | <b>Experiment 2 – Water:NaCl Ratio</b> |                |                        |
|-----------------------|----------------------------------------|----------------|------------------------|
| Diet                  | F(1,29)=417.8                          | p<0.001        | partial $\eta^2=0.935$ |
| Context               | F(1,29)=0.839                          | p=0.367        | partial $\eta^2=0.028$ |
| Time                  | F(3.96,114.7)=4.894                    | p=0.001        | partial $\eta^2=0.144$ |
| Time × Diet           | F(3.96,114.7)=4.698                    | <b>p=0.002</b> | partial $\eta^2=0.139$ |
| Time × Context        | F(3.96,114.7)=0.952                    | p=0.436        | partial $\eta^2=0.032$ |
| Diet × Context        | F(1,29)=1.627                          | p=0.212        | partial $\eta^2=0.053$ |
| Time × Diet × Context | F(3.96,114.7)=0.792                    | p=0.532        | partial $\eta^2=0.027$ |

S25D Table

| <b>Males</b>   | <b>Experiment 2 – Water:NaCl Ratio</b> |                |                        |
|----------------|----------------------------------------|----------------|------------------------|
| Diet           | F(1,31)=154.6                          | p<0.001        | partial $\eta^2=0.833$ |
| Context        | F(1,31)=1.027                          | p=0.319        | partial $\eta^2=0.032$ |
| Time           | F(3.70,114.6)=8.018                    | p<0.001        | partial $\eta^2=0.205$ |
| Time × Diet    | F(1.17,37.97)=4.476                    | <b>p=0.003</b> | partial $\eta^2=0.126$ |
| Time × Context | F(1.17,37.97)=0.161                    | p=0.949        | partial $\eta^2=0.005$ |

|                       |                     |         |                        |
|-----------------------|---------------------|---------|------------------------|
| Diet × Context        | F(1,31)=0.615       | p=0.439 | partial $\eta^2=0.019$ |
| Time × Diet × Context | F(1.17,37.97)=0.170 | p=0.945 | partial $\eta^2=0.005$ |

---

S25E Table

| <b>Females</b>        | <b>Experiment 3 – Water:NaCl Ratio</b> |                |                        |
|-----------------------|----------------------------------------|----------------|------------------------|
| Diet                  | F(1,28)=225.1                          | p<0.001        | partial $\eta^2=0.889$ |
| Context               | F(1,28)=0.184                          | p=0.671        | partial $\eta^2=0.007$ |
| Time                  | F(2.64,73.98)=4.532                    | p=0.008        | partial $\eta^2=0.139$ |
| Time × Diet           | F(2.64,73.98)=3.094                    | <b>p=0.038</b> | partial $\eta^2=0.100$ |
| Time × Context        | F(2.64,73.98)=0.358                    | p=0.758        | partial $\eta^2=0.013$ |
| Diet × Context        | F(1,28)=0.165                          | p=0.687        | partial $\eta^2=0.006$ |
| Time × Diet × Context | F(2.64,73.98)=0.394                    | p=0.732        | partial $\eta^2=0.014$ |

---

S25F Table

| <b>Males</b>          | <b>Experiment 3 – Water:NaCl Ratio</b> |                |                        |
|-----------------------|----------------------------------------|----------------|------------------------|
| Diet                  | F(1,27)=212.8                          | p<0.001        | partial $\eta^2=0.887$ |
| Context               | F(1,27)=0.999                          | p=0.326        | partial $\eta^2=0.036$ |
| Time                  | F(2.82,76.01)=8.667                    | p<0.001        | partial $\eta^2=0.243$ |
| Time × Diet           | F(2.82,76.01)=4.683                    | <b>p=0.006</b> | partial $\eta^2=0.148$ |
| Time × Context        | F(2.82,76.01)=1.027                    | p=0.382        | partial $\eta^2=0.037$ |
| Diet × Context        | F(1,27)=1.140                          | p=0.295        | partial $\eta^2=0.041$ |
| Time × Diet × Context | F(2.82,76.01)=0.879                    | p=0.450        | partial $\eta^2=0.032$ |

---
