# Supplementary material for: Generalization of contextual fear is sex-specifically affected by high salt intake
Source: PubMed Central journal article supplement (PMC10343085; doi:10.1371/journal.pone.0286221), 2023-07-13
Supplement: pone.0286221.s026.pdf [file pone.0286221.s026.pdf]

## Supplemental Material for

Generalization of contextual fear is sex-specifically affected by high salt intake

Jasmin N. Beaver<sup>1,2</sup>, Brady L. Weber<sup>1,2</sup>, Matthew T. Ford<sup>1</sup>, Anna E. Anello<sup>1,2</sup>, Kaden M. Ruffin<sup>1</sup>,  
Sarah K. Kassis<sup>1,2</sup>, T. Lee Gilman<sup>1,2,3\*</sup>

<sup>1</sup>Department of Psychological Sciences, Kent State University, Kent, Ohio, United States of America

<sup>2</sup>Brain Health Research Institute, Kent State University, Kent, Ohio, United States of America

<sup>3</sup>Healthy Communities Research Institute, Kent State University, Kent, Ohio, United States of America

\*Corresponding Author

Email: [lgilman1@kent.edu](mailto:lgilman1@kent.edu) (TLG)

**S26 Table. Three-way repeated measures ANOVAs on weekly average kcal consumed per day by context fear conditioned mice across Experiments.**

S26A Table

| <b>Females</b>        | <b>Experiment 1 – kcal/day</b> |                 |                                 |
|-----------------------|--------------------------------|-----------------|---------------------------------|
| Diet                  | F(1,30)=3.622                  | p= <b>0.067</b> | partial $\eta^2$ = <b>0.108</b> |
| Context               | F(1,30)=0.105                  | p=0.749         | partial $\eta^2$ =0.003         |
| Time                  | F(1.67,50.22)=0.640            | p=0.505         | partial $\eta^2$ =0.021         |
| Time × Diet           | F(1.67,50.22)=0.568            | p=0.540         | partial $\eta^2$ =0.019         |
| Time × Context        | F(1.67,50.22)=1.251            | p=0.290         | partial $\eta^2$ =0.040         |
| Diet × Context        | F(1,30)=0.244                  | p=0.625         | partial $\eta^2$ =0.008         |
| Time × Diet × Context | F(1.67,50.22)=0.823            | p=0.426         | partial $\eta^2$ =0.027         |

S26B Table

| <b>Males</b>          | <b>Experiment 1 – kcal/day</b> |         |                         |
|-----------------------|--------------------------------|---------|-------------------------|
| Diet                  | F(1,29)=0.204                  | p=0.655 | partial $\eta^2$ =0.007 |
| Context               | F(1,29)=0.013                  | p=0.911 | partial $\eta^2$ =0.000 |
| Time                  | F(1.85,53.70)=1.833            | p=0.172 | partial $\eta^2$ =0.059 |
| Time × Diet           | F(1.85,53.70)=0.354            | p=0.687 | partial $\eta^2$ =0.012 |
| Time × Context        | F(1.85,53.70)=0.148            | p=0.847 | partial $\eta^2$ =0.005 |
| Diet × Context        | F(1,29)=0.003                  | p=0.959 | partial $\eta^2$ =0.000 |
| Time × Diet × Context | F(1.85,53.70)=0.866            | p=0.419 | partial $\eta^2$ =0.029 |

S26C Table

| <b>Females</b>        | <b>Experiment 2 – kcal/day</b> |                 |                                 |
|-----------------------|--------------------------------|-----------------|---------------------------------|
| Diet                  | F(1,30)=27.67                  | p< <b>0.001</b> | partial $\eta^2$ = <b>0.480</b> |
| Context               | F(1,30)=0.016                  | p=0.901         | partial $\eta^2$ =0.001         |
| Time                  | F(3.72,111.7)=13.06            | p< <b>0.001</b> | partial $\eta^2$ = <b>0.303</b> |
| Time × Diet           | F(3.72,111.7)=0.221            | p=0.916         | partial $\eta^2$ =0.007         |
| Time × Context        | F(3.72,111.7)=1.325            | p=0.267         | partial $\eta^2$ =0.042         |
| Diet × Context        | F(1,30)=0.034                  | p=0.856         | partial $\eta^2$ =0.001         |
| Time × Diet × Context | F(3.72,111.7)=0.434            | p=0.771         | partial $\eta^2$ =0.014         |

S26D Table

| <b>Males</b>   | <b>Experiment 2 – kcal/day</b> |                 |                                 |
|----------------|--------------------------------|-----------------|---------------------------------|
| Diet           | F(1,32)=0.756                  | p=0.391         | partial $\eta^2$ =0.023         |
| Context        | F(1,32)=0.117                  | p=0.735         | partial $\eta^2$ =0.004         |
| Time           | F(4.32,138.1)=10.33            | p< <b>0.001</b> | partial $\eta^2$ = <b>0.244</b> |
| Time × Diet    | F(4.32,138.1)=1.334            | p=0.258         | partial $\eta^2$ =0.040         |
| Time × Context | F(4.32,138.1)=0.436            | p=0.797         | partial $\eta^2$ =0.013         |

|                       |                     |         |                        |
|-----------------------|---------------------|---------|------------------------|
| Diet × Context        | F(1,32)=0.654       | p=0.425 | partial $\eta^2=0.020$ |
| Time × Diet × Context | F(4.32,138.1)=0.759 | p=0.563 | partial $\eta^2=0.023$ |

---

S26E Table

| <b>Females</b>        | <b>Experiment 3 – kcal/day</b> |                |                        |
|-----------------------|--------------------------------|----------------|------------------------|
| Diet                  | F(1,30)=10.63                  | <b>p=0.003</b> | partial $\eta^2=0.262$ |
| Context               | F(1,30)=1.166                  | p=0.289        | partial $\eta^2=0.037$ |
| Time                  | F(2.81,84.25)=5.167            | <b>p=0.003</b> | partial $\eta^2=0.147$ |
| Time × Diet           | F(2.81,84.25)=1.684            | p=0.180        | partial $\eta^2=0.053$ |
| Time × Context        | F(2.81,84.25)=0.462            | p=0.697        | partial $\eta^2=0.015$ |
| Diet × Context        | F(1,30)=0.029                  | p=0.866        | partial $\eta^2=0.001$ |
| Time × Diet × Context | F(2.81,84.25)=0.453            | p=0.703        | partial $\eta^2=0.015$ |

---

S26F Table

| <b>Males</b>          | <b>Experiment 3 – kcal/day</b> |                |                        |
|-----------------------|--------------------------------|----------------|------------------------|
| Diet                  | F(1,28)=4.534                  | <b>p=0.042</b> | partial $\eta^2=0.139$ |
| Context               | F(1,28)=0.014                  | p=0.906        | partial $\eta^2=0.001$ |
| Time                  | F(3.42,95.83)=5.161            | <b>p=0.002</b> | partial $\eta^2=0.156$ |
| Time × Diet           | F(3.42,95.83)=0.990            | p=0.408        | partial $\eta^2=0.034$ |
| Time × Context        | F(3.42,95.83)=1.274            | p=0.287        | partial $\eta^2=0.044$ |
| Diet × Context        | F(1,28)=0.489                  | p=0.490        | partial $\eta^2=0.017$ |
| Time × Diet × Context | F(3.42,95.83)=0.552            | p=0.671        | partial $\eta^2=0.019$ |

---
