# Supplementary material for: Generalization of contextual fear is sex-specifically affected by high salt intake
Source: PubMed Central journal article supplement (PMC10343085; doi:10.1371/journal.pone.0286221), 2023-07-13
Supplement: pone.0286221.s027.pdf [file pone.0286221.s027.pdf]

## Supplemental Material for

Generalization of contextual fear is sex-specifically affected by high salt intake

Jasmin N. Beaver<sup>1,2</sup>, Brady L. Weber<sup>1,2</sup>, Matthew T. Ford<sup>1</sup>, Anna E. Anello<sup>1,2</sup>, Kaden M. Ruffin<sup>1</sup>, Sarah K. Kassis<sup>1,2</sup>, T. Lee Gilman<sup>1,2,3\*</sup>

<sup>1</sup>Department of Psychological Sciences, Kent State University, Kent, Ohio, United States of America

<sup>2</sup>Brain Health Research Institute, Kent State University, Kent, Ohio, United States of America

<sup>3</sup>Healthy Communities Research Institute, Kent State University, Kent, Ohio, United States of America

\*Corresponding Author

Email: [lgilman1@kent.edu](mailto:lgilman1@kent.edu) (TLG)

**S27 Table. Three-way repeated measures ANOVAs on weekly kcal consumed as a percentage of body weight in context fear conditioned mice across Experiments.**

S27A Table

| <b>Females</b>        | <b>Experiment 1 – kcal as % BW</b> |         |                         |
|-----------------------|------------------------------------|---------|-------------------------|
| Diet                  | F(1,30)=2.043                      | p=0.163 | partial $\eta^2$ =0.064 |
| Context               | F(1,30)=0.320                      | p=0.576 | partial $\eta^2$ =0.011 |
| Time                  | F(1.61,48.41)=3.279                | p=0.056 | partial $\eta^2$ =0.099 |
| Time × Diet           | F(1.61,48.41)=0.462                | p=0.591 | partial $\eta^2$ =0.015 |
| Time × Context        | F(1.61,48.41)=1.166                | p=0.311 | partial $\eta^2$ =0.037 |
| Diet × Context        | F(1,30)=0.140                      | p=0.710 | partial $\eta^2$ =0.005 |
| Time × Diet × Context | F(1.61,48.41)=0.756                | p=0.448 | partial $\eta^2$ =0.025 |

S27B Table

| <b>Males</b>          | <b>Experiment 1 – kcal as % BW</b> |         |                         |
|-----------------------|------------------------------------|---------|-------------------------|
| Diet                  | F(1,29)=0.000                      | p=0.993 | partial $\eta^2$ =0.000 |
| Context               | F(1,29)=0.006                      | p=0.941 | partial $\eta^2$ =0.000 |
| Time                  | F(1.71,49.67)=0.479                | p=0.593 | partial $\eta^2$ =0.016 |
| Time × Diet           | F(1.71,49.67)=0.459                | p=0.605 | partial $\eta^2$ =0.016 |
| Time × Context        | F(1.71,49.67)=0.272                | p=0.729 | partial $\eta^2$ =0.009 |
| Diet × Context        | F(1,29)=0.024                      | p=0.878 | partial $\eta^2$ =0.001 |
| Time × Diet × Context | F(1.71,49.67)=0.631                | p=0.512 | partial $\eta^2$ =0.021 |

S27C Table

| <b>Females</b>        | <b>Experiment 2 – kcal as % BW</b> |                   |                                 |
|-----------------------|------------------------------------|-------------------|---------------------------------|
| Diet                  | F(1,30)=25.14                      | <b>p&lt;0.001</b> | partial $\eta^2$ = <b>0.456</b> |
| Context               | F(1,30)=0.003                      | p=0.953           | partial $\eta^2$ =0.000         |
| Time                  | F(3.40,102.1)=5.508                | <b>p&lt;0.001</b> | partial $\eta^2$ = <b>0.155</b> |
| Time × Diet           | F(3.40,102.1)=0.541                | p=0.677           | partial $\eta^2$ =0.018         |
| Time × Context        | F(3.40,102.1)=1.330                | p=0.267           | partial $\eta^2$ =0.042         |
| Diet × Context        | F(1,30)=0.428                      | p=0.518           | partial $\eta^2$ =0.014         |
| Time × Diet × Context | F(3.40,102.1)=0.487                | p=0.487           | partial $\eta^2$ =0.016         |

S27D Table

| <b>Males</b>   | <b>Experiment 2 – kcal as % BW</b> |                   |                                 |
|----------------|------------------------------------|-------------------|---------------------------------|
| Diet           | F(1,32)=0.793                      | p=0.380           | partial $\eta^2$ =0.024         |
| Context        | F(1,32)=0.424                      | p=0.520           | partial $\eta^2$ =0.013         |
| Time           | F(3.71,118.6)=6.216                | <b>p&lt;0.001</b> | partial $\eta^2$ = <b>0.163</b> |
| Time × Diet    | F(3.71,118.6)=1.178                | p=0.324           | partial $\eta^2$ =0.036         |
| Time × Context | F(3.71,118.6)=0.414                | p=0.784           | partial $\eta^2$ =0.013         |

|                       |                     |         |                        |
|-----------------------|---------------------|---------|------------------------|
| Diet × Context        | F(1,32)=2.189       | p=0.149 | partial $\eta^2=0.064$ |
| Time × Diet × Context | F(3.71,118.6)=0.413 | p=0.785 | partial $\eta^2=0.013$ |

---

S27E Table

| <b>Females</b>        | <b>Experiment 3 – kcal as % BW</b> |                |                        |
|-----------------------|------------------------------------|----------------|------------------------|
| Diet                  | F(1,30)=6.312                      | <b>p=0.018</b> | partial $\eta^2=0.174$ |
| Context               | F(1,30)=0.005                      | p=0.947        | partial $\eta^2=0.000$ |
| Time                  | F(2.59,77.66)=5.137                | <b>p=0.004</b> | partial $\eta^2=0.146$ |
| Time × Diet           | F(2.59,77.66)=1.132                | p=0.337        | partial $\eta^2=0.036$ |
| Time × Context        | F(2.59,77.66)=0.494                | p=0.660        | partial $\eta^2=0.016$ |
| Diet × Context        | F(1,30)=1.458                      | p=0.237        | partial $\eta^2=0.046$ |
| Time × Diet × Context | F(2.59,77.66)=0.217                | p=0.858        | partial $\eta^2=0.007$ |

---

S27F Table

| <b>Males</b>          | <b>Experiment 3 – kcal as % BW</b> |                   |                        |
|-----------------------|------------------------------------|-------------------|------------------------|
| Diet                  | F(1,28)=12.08                      | <b>p=0.002</b>    | partial $\eta^2=0.301$ |
| Context               | F(1,28)=1.490                      | p=0.232           | partial $\eta^2=0.051$ |
| Time                  | F(3.06,85.77)=8.143                | <b>p&lt;0.001</b> | partial $\eta^2=0.225$ |
| Time × Diet           | F(3.06,85.77)=0.870                | p=0.462           | partial $\eta^2=0.030$ |
| Time × Context        | F(3.06,85.77)=1.053                | p=0.374           | partial $\eta^2=0.036$ |
| Diet × Context        | F(1,28)=0.277                      | p=0.603           | partial $\eta^2=0.010$ |
| Time × Diet × Context | F(3.06,85.77)=0.509                | p=0.681           | partial $\eta^2=0.018$ |

---

S19 Figure

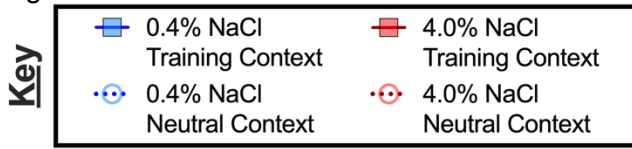

**A**

**Experiment 1**

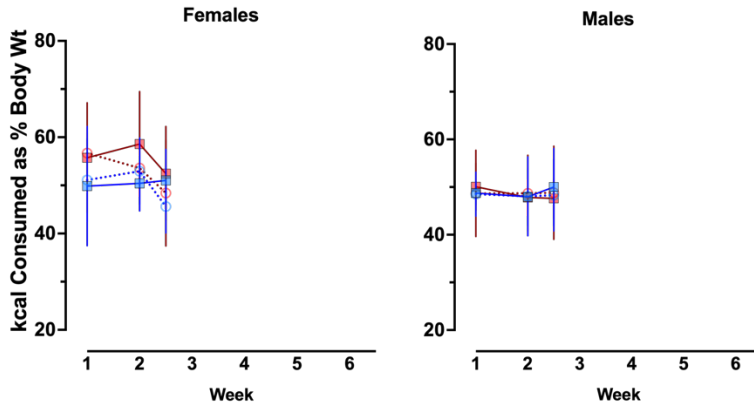

**B**

**Experiment 2**

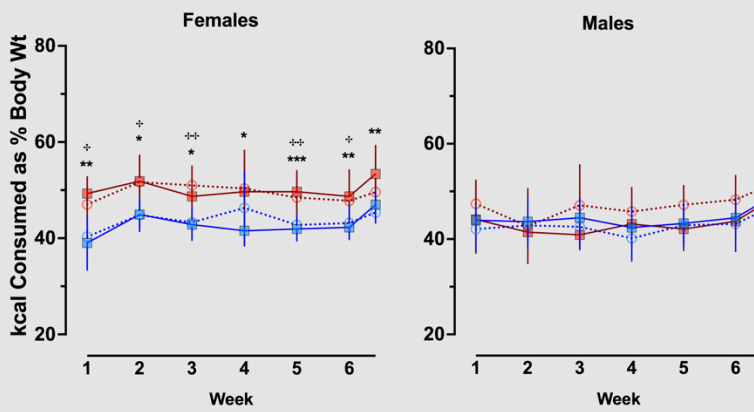

**C**

**Experiment 3**

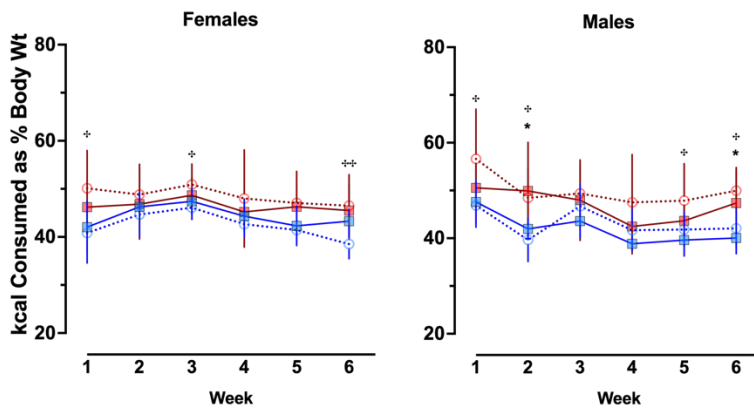

**S19 Fig. Consumed kcal as a percentage of body weight by context fear conditioned mice across Experiments.**

Mice assigned to 0.4% NaCl represented by blue symbols, mice assigned to 4.0% NaCl represented by red symbols; mice to be tested in Training Context represented by squares and solid lines, mice to be tested in Neutral Context represented by circles and dotted lines.

Consumed kcal as a percentage of body weight was calculated for each full week, plus the partial weeks at the conclusion of A) Experiment 1 and B) Experiment 2 (grey shading). Some data loss occurred on the very last weighing day for a subset of animals in C) Experiment 3, thus graphs and repeated measures statistical analyses for Experiment 3 calculations cease at week 6 to maximize inclusion of mice in repeated measures analyses. Experiment 1: 0.4% NaCl females Training Context, n=8; 0.4% NaCl females Neutral Context, n=9; 4.0% NaCl females Training Context, n=8; 4.0% NaCl females Neutral Context, n=9; 0.4% NaCl males Training Context, n=8; 0.4% NaCl males Neutral Context, n=9; 4.0% NaCl males Training Context, n=8; 4.0% NaCl males Neutral Context, n=8. Experiment 2: 0.4% NaCl females Training Context, n=9; 0.4% NaCl females Neutral Context, n=9; 4.0% NaCl females Training Context, n=8; 4.0% NaCl females Neutral Context, n=8; 0.4% NaCl males Training Context, n=9; 0.4% NaCl males Neutral Context, n=9; 4.0% NaCl males Training Context, n=8; 4.0% NaCl males Neutral Context, n=10. Experiment 3: 0.4% NaCl females Training Context, n=8; 0.4% NaCl females Neutral Context, n=9; 4.0% NaCl females Training Context, n=9; 4.0% NaCl females Neutral Context, n=8; 0.4% NaCl males Training Context, n=8; 0.4% NaCl males Neutral Context, n=8; 4.0% NaCl males Training Context, n=8; 4.0% NaCl males Neutral Context, n=8. Data are graphed as mean  $\pm$  95% confidence interval. \*p<0.05, \*\*p<0.01, \*\*\*p<0.001 indicate difference between mice within the same sex consuming 0.4% NaCl versus 4.0% NaCl and tested in Training Context. +p<0.05, ++p<0.01, +++p<0.001 indicate difference

between mice within the same sex consuming 0.4% NaCl versus 4.0% NaCl and tested in Neutral Context.

**S28 Table. Three-way repeated measures ANOVAs on weekly average NaCl consumed per day by control no shock mice across Experiments.**

S28A Table

| <b>Experiment 1</b> | <b>NaCl/day</b>     |                |                                 |
|---------------------|---------------------|----------------|---------------------------------|
| Sex                 | F(1,31)=6.870       | p=0.013        | partial $\eta^2$ =0.181         |
| Diet                | F(1,31)=585.5       | p<0.001        | partial $\eta^2$ =0.950         |
| Time                | F(1.55,47.89)=0.069 | p=0.890        | partial $\eta^2$ =0.002         |
| Time × Sex          | F(1.55,47.89)=1.907 | p=0.168        | partial $\eta^2$ =0.058         |
| Time × Diet         | F(1.55,47.89)=0.103 | p=0.853        | partial $\eta^2$ =0.003         |
| Sex × Diet          | F(1,31)=4.262       | <b>p=0.047</b> | partial $\eta^2$ = <b>0.121</b> |
| Time × Sex × Diet   | F(1.55,47.89)=1.733 | p=0.193        | partial $\eta^2$ =0.053         |

S28B Table

| <b>Experiment 2</b> | <b>NaCl/day</b>     |                |                                 |
|---------------------|---------------------|----------------|---------------------------------|
| Sex                 | F(1,29)=14.80       | p<0.001        | partial $\eta^2$ =0.338         |
| Diet                | F(1,29)=1821        | p<0.001        | partial $\eta^2$ =0.984         |
| Time                | F(2.40,69.59)=3.232 | p=0.037        | partial $\eta^2$ =0.100         |
| Time × Sex          | F(2.40,69.59)=0.157 | p=0.889        | partial $\eta^2$ =0.005         |
| Time × Diet         | F(2.40,69.59)=3.330 | <b>p=0.033</b> | partial $\eta^2$ = <b>0.103</b> |
| Sex × Diet          | F(1,29)=11.10       | <b>p=0.002</b> | partial $\eta^2$ = <b>0.277</b> |
| Time × Sex × Diet   | F(2.40,69.59)=0.132 | p=0.909        | partial $\eta^2$ =0.005         |

S28C Table

| <b>Experiment 3</b> | <b>NaCl/day</b>     |                |                                 |
|---------------------|---------------------|----------------|---------------------------------|
| Sex                 | F(1,28)=6.847       | p=0.014        | partial $\eta^2$ =0.196         |
| Diet                | F(1,28)=318.3       | p<0.001        | partial $\eta^2$ =0.919         |
| Time                | F(2.37,66.44)=0.759 | p=0.493        | partial $\eta^2$ =0.026         |
| Time × Sex          | F(2.37,66.44)=1.633 | p=0.199        | partial $\eta^2$ =0.055         |
| Time × Diet         | F(2.37,66.44)=0.729 | p=0.508        | partial $\eta^2$ =0.025         |
| Sex × Diet          | F(1,28)=3.864       | <b>p=0.059</b> | partial $\eta^2$ = <b>0.121</b> |
| Time × Sex × Diet   | F(2.37,66.44)=1.580 | p=0.210        | partial $\eta^2$ =0.053         |

**S29 Table. Three-way repeated measures ANOVAs on weekly NaCl consumed as a percentage of body weight by control no shock mice across Experiments.**

S29A Table

| <b>Experiment 1</b> | <b>NaCl as % BW</b> |                |                                          |
|---------------------|---------------------|----------------|------------------------------------------|
| Sex                 | F(1,31)=0.304       | p=0.585        | partial $\eta^2$ =0.010                  |
| Diet                | F(1,31)=323.9       | p<0.001        | partial $\eta^2$ =0.913                  |
| Time                | F(1.52,47.12)=0.936 | p=0.376        | partial $\eta^2$ =0.029                  |
| Time × Sex          | F(1.52,47.12)=3.195 | p=0.063        | partial $\eta^2$ =0.093                  |
| Time × Diet         | F(1.52,47.12)=0.743 | p=0.447        | partial $\eta^2$ =0.023                  |
| Sex × Diet          | F(1,31)=0.329       | p=0.570        | partial $\eta^2$ =0.011                  |
| Time × Sex × Diet   | F(1.52,47.12)=2.829 | <b>p=0.083</b> | <b>partial <math>\eta^2</math>=0.084</b> |

S29B Table

| <b>Experiment 2</b> | <b>NaCl as % BW</b> |                |                                          |
|---------------------|---------------------|----------------|------------------------------------------|
| Sex                 | F(1,29)=4.453       | p=0.044        | partial $\eta^2$ =0.133                  |
| Diet                | F(1,29)=2475        | p<0.001        | partial $\eta^2$ =0.988                  |
| Time                | F(1.92,55.69)=2.794 | p=0.072        | partial $\eta^2$ =0.088                  |
| Time × Sex          | F(1.92,55.69)=0.109 | p=0.889        | partial $\eta^2$ =0.004                  |
| Time × Diet         | F(1.92,55.69)=3.222 | <b>p=0.049</b> | <b>partial <math>\eta^2</math>=0.100</b> |
| Sex × Diet          | F(1,29)=3.125       | <b>p=0.088</b> | <b>partial <math>\eta^2</math>=0.097</b> |
| Time × Sex × Diet   | F(1.92,55.69)=0.074 | p=0.923        | partial $\eta^2$ =0.003                  |

S29C Table

| <b>Experiment 3</b> | <b>NaCl as % BW</b> |                   |                                          |
|---------------------|---------------------|-------------------|------------------------------------------|
| Sex                 | F(1,28)=0.211       | p=0.649           | partial $\eta^2$ =0.007                  |
| Diet                | F(1,28)=438.4       | <b>p&lt;0.001</b> | <b>partial <math>\eta^2</math>=0.940</b> |
| Time                | F(2.91,81.55)=1.500 | p=0.222           | partial $\eta^2$ =0.051                  |
| Time × Sex          | F(2.91,81.55)=1.040 | p=0.378           | partial $\eta^2$ =0.036                  |
| Time × Diet         | F(2.91,81.55)=1.330 | p=0.271           | partial $\eta^2$ =0.045                  |
| Sex × Diet          | F(1,28)=0.521       | p=0.476           | partial $\eta^2$ =0.018                  |
| Time × Sex × Diet   | F(2.91,81.55)=0.940 | p=0.423           | partial $\eta^2$ =0.032                  |



S20 Figure

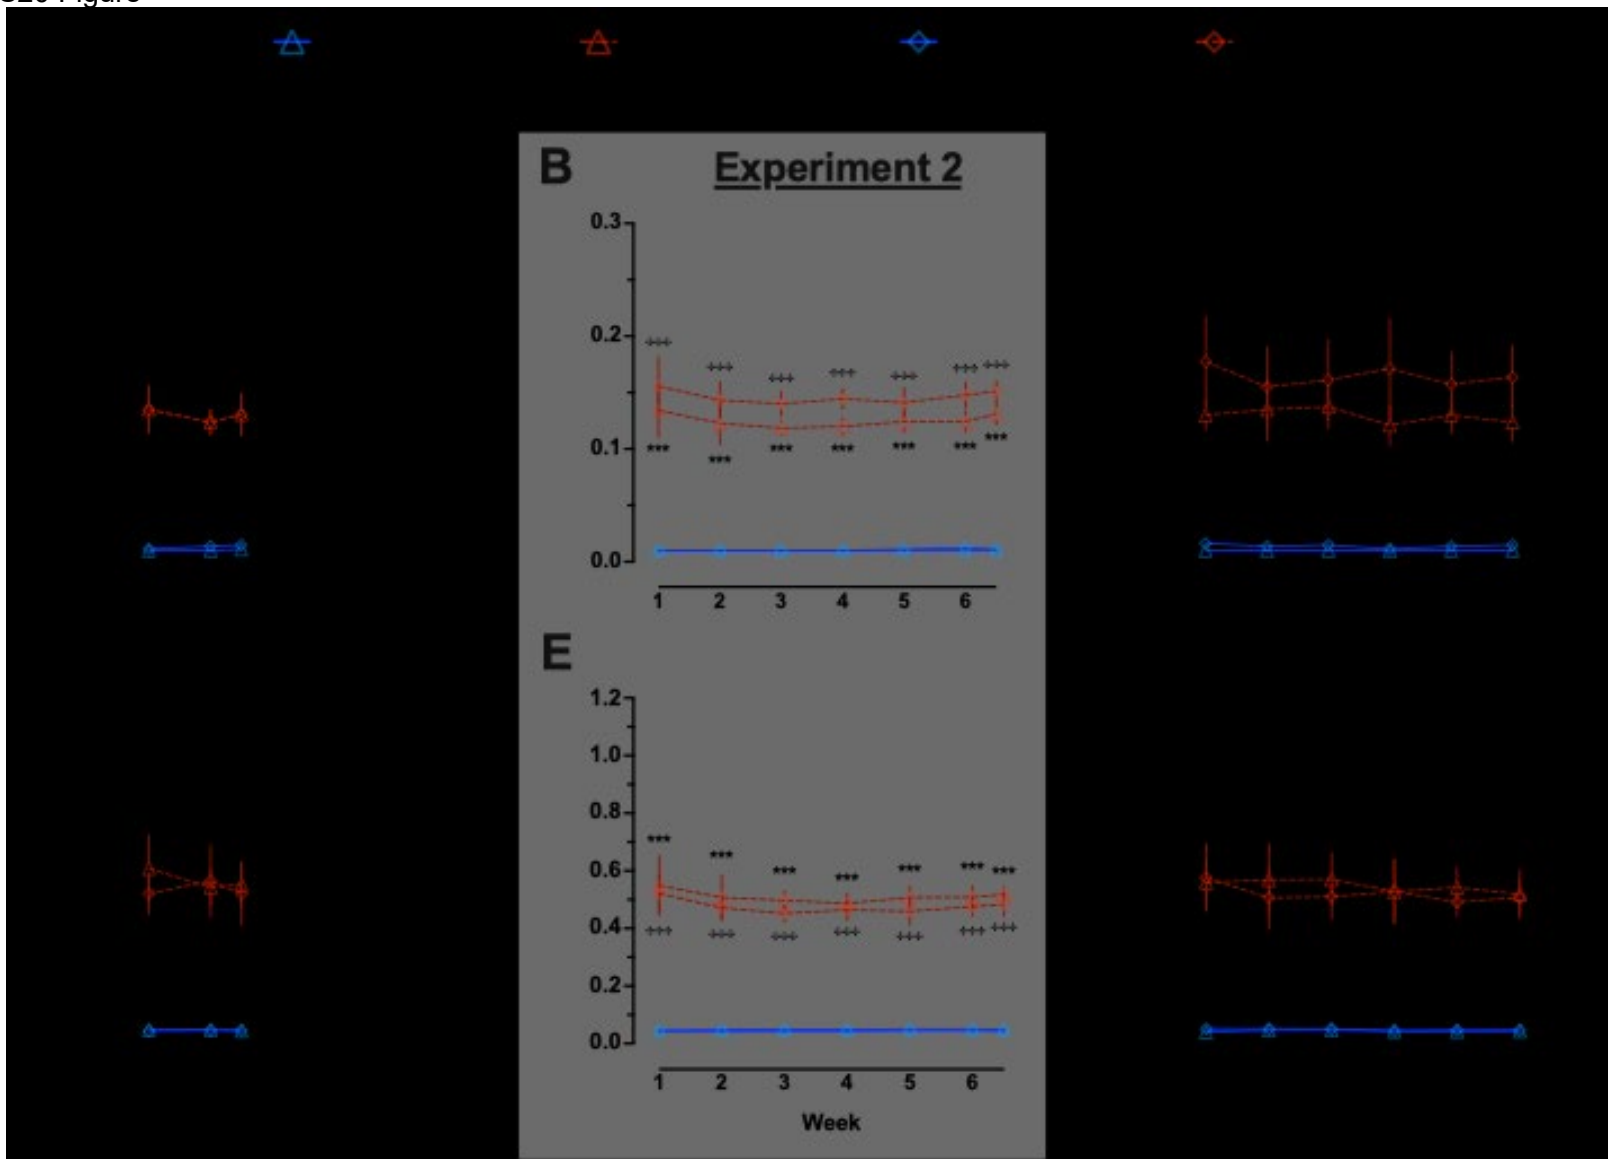

**S20 Fig. Average NaCl consumed per day and NaCl consumed as a percentage of body weight by control no shock mice across Experiments.**

Females represented by triangles, males by diamonds; 0.4% NaCl represented by blue symbols and solid lines, 4.0% NaCl represented by red symbols and dashed lines. A, B, C) NaCl consumed per day and D, E, F) NaCl consumption as a percentage of body weight were calculated for each full week, and for the partial week at the conclusion of A, D) Experiment 1 and B, E) Experiment 2 (grey shading). Some data loss occurred on the very last weighing day for a subset of animals in C, F) Experiment 3, thus graphs and repeated measures statistical analyses for Experiment 3 calculations cease at week 6 to maximize inclusion of mice in repeated measures analyses. Experiment 1: 0.4% NaCl females, n=9; 4.0% NaCl females, n=9; 0.4% NaCl males, n=8; 4.0% NaCl males, n=9. Experiment 2: 0.4% NaCl females, n=8; 4.0% NaCl females, n=7; 0.4% NaCl males, n=9; 4.0% NaCl males, n=9. Experiment 3: 0.4% NaCl females, n=8; 4.0% NaCl females, n=8; 0.4% NaCl males, n=8; 4.0% NaCl males, n=8. Data are graphed as mean  $\pm$  95% confidence interval. \*p<0.05, \*\*p<0.01, \*\*\*p<0.001 indicate difference between females consuming 0.4% NaCl versus 4.0% NaCl. †p<0.05, ††p<0.01, †††p<0.001 indicate difference between males consuming 0.4% NaCl versus 4.0% NaCl.

**S30 Table. Three-way repeated measures ANOVAs on weekly water to NaCl ratio consumed by control no shock mice across Experiments.**

S30A Table

| <b>Experiment 1</b> | <b>Water:NaCl Ratio</b> |                   |                                 |
|---------------------|-------------------------|-------------------|---------------------------------|
| Sex                 | F(1,31)=13.68           | p<0.001           | partial $\eta^2$ =0.306         |
| Diet                | F(1,31)=487.2           | p<0.001           | partial $\eta^2$ =0.940         |
| Time                | F(1.39,43.09)=3.731     | <b>p=0.047</b>    | partial $\eta^2$ = <b>0.107</b> |
| Time × Sex          | F(1.39,43.09)=2.248     | p=0.133           | partial $\eta^2$ =0.068         |
| Time × Diet         | F(1.39,43.09)=3.027     | p=0.076           | partial $\eta^2$ =0.089         |
| Sex × Diet          | F(1,31)=18.22           | <b>p&lt;0.001</b> | partial $\eta^2$ = <b>0.370</b> |
| Time × Sex × Diet   | F(1.39,43.09)=2.048     | p=0.154           | partial $\eta^2$ =0.062         |

S30B Table

| <b>Experiment 2</b> | <b>Water:NaCl Ratio</b> |                |                                 |
|---------------------|-------------------------|----------------|---------------------------------|
| Sex                 | F(1,29)=1.913           | p=0.177        | partial $\eta^2$ =0.062         |
| Diet                | F(1,29)=589.6           | p<0.001        | partial $\eta^2$ =0.953         |
| Time                | F(3.93,113.8)=2.126     | p=0.083        | partial $\eta^2$ =0.068         |
| Time × Sex          | F(3.93,113.8)=5.567     | p<0.001        | partial $\eta^2$ =0.161         |
| Time × Diet         | F(3.93,113.8)=1.161     | p=0.332        | partial $\eta^2$ =0.038         |
| Sex × Diet          | F(1,29)=2.208           | p=0.148        | partial $\eta^2$ =0.071         |
| Time × Sex × Diet   | F(3.93,113.8)=4.342     | <b>p=0.003</b> | partial $\eta^2$ = <b>0.130</b> |

S30C Table

| <b>Experiment 3</b> | <b>Water:NaCl Ratio</b> |                |                                 |
|---------------------|-------------------------|----------------|---------------------------------|
| Sex                 | F(1,28)=2.707           | p=0.111        | partial $\eta^2$ =0.088         |
| Diet                | F(1,28)=137.4           | p<0.001        | partial $\eta^2$ =0.831         |
| Time                | F(2.85,79.82)=1.662     | p=0.184        | partial $\eta^2$ =0.056         |
| Time × Sex          | F(2.85,79.82)=4.474     | p=0.007        | partial $\eta^2$ =0.138         |
| Time × Diet         | F(2.85,79.82)=1.050     | p=0.373        | partial $\eta^2$ =0.036         |
| Sex × Diet          | F(1,28)=0.347           | p=0.561        | partial $\eta^2$ =0.012         |
| Time × Sex × Diet   | F(2.85,79.82)=4.428     | <b>p=0.007</b> | partial $\eta^2$ = <b>0.137</b> |

S21 Figure

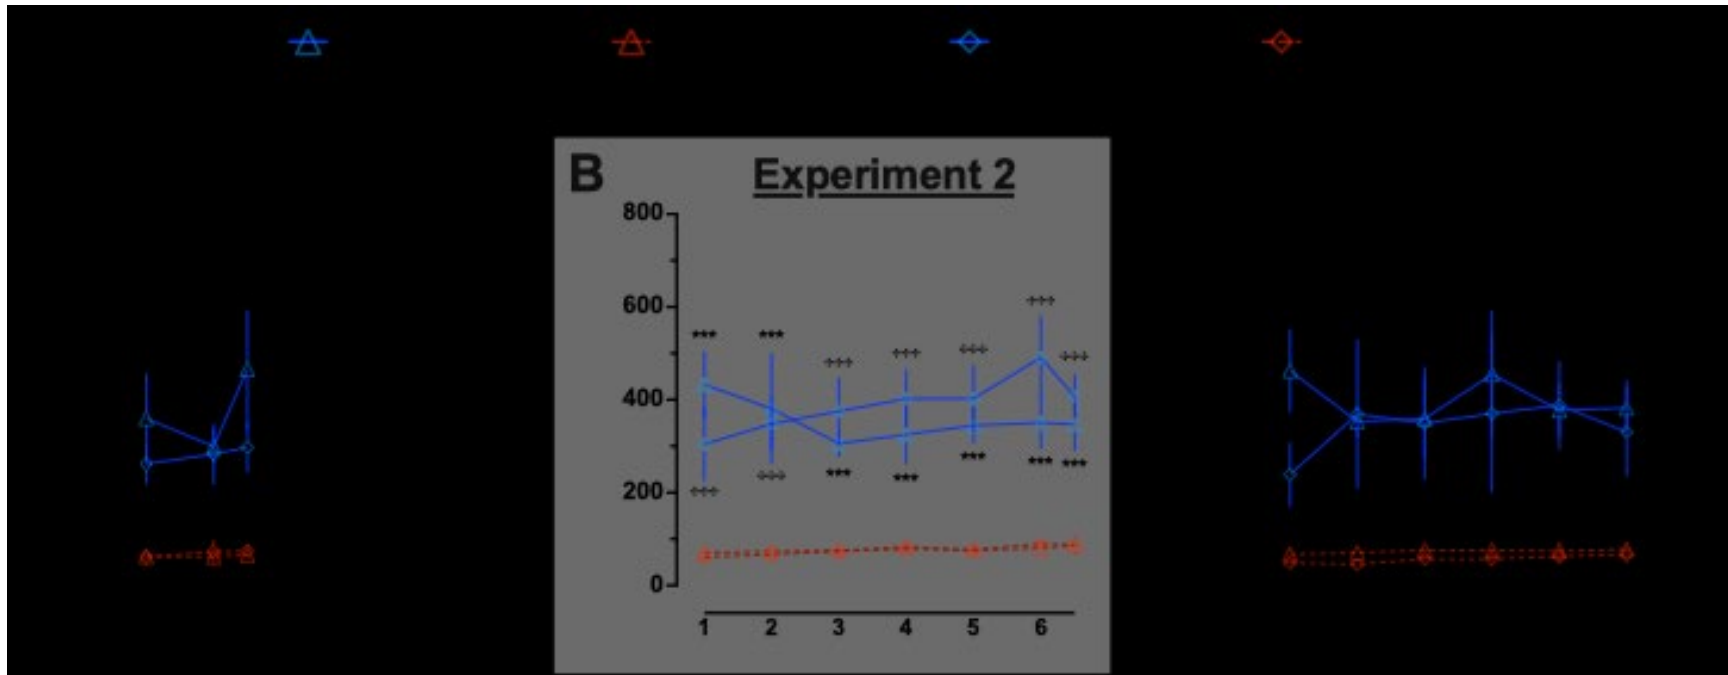

**S21 Fig. Ratio of water to NaCl consumed by control no shock mice across Experiments.**

Females represented by triangles, males by diamonds; 0.4% NaCl represented by blue symbols and solid lines, 4.0% NaCl represented by red symbols and dashed lines. Water to NaCl consumption ratio was calculated for each full week, and for the partial week at the conclusion of A) Experiment 1 and B) Experiment 2 (grey shading). Some data loss occurred on the very last weighing day for a subset of animals in C) Experiment 3, thus graphs and repeated measures statistical analyses for Experiment 3 calculations cease at week 6 to maximize inclusion of mice in repeated measures analyses. Experiment 1: 0.4% NaCl females, n=9; 4.0% NaCl females, n=9; 0.4% NaCl males, n=8; 4.0% NaCl males, n=9. Experiment 2: 0.4% NaCl females, n=8; 4.0% NaCl females, n=7; 0.4% NaCl males, n=9; 4.0% NaCl males, n=9. Experiment 3: 0.4% NaCl females, n=8; 4.0% NaCl females, n=8; 0.4% NaCl males, n=8; 4.0% NaCl males, n=8. Data are graphed as mean  $\pm$  95% confidence interval. \*p<0.05, \*\*p<0.01, \*\*\*p<0.001 indicate difference between females consuming 0.4% NaCl versus 4.0% NaCl. +p<0.05, ++p<0.01, +++p<0.001 indicate difference between males consuming 0.4% NaCl versus 4.0% NaCl.

**S31 Table. Three-way repeated measures ANOVAs on weekly average kcal consumed per day by control no shock mice across Experiments.**

S31A Table

| <b>Experiment 1</b> | <b>kcal/day</b>     |                   |                        |
|---------------------|---------------------|-------------------|------------------------|
| Sex                 | F(1,31)=17.84       | <b>p&lt;0.001</b> | partial $\eta^2=0.365$ |
| Diet                | F(1,31)=4.655       | <b>p=0.039</b>    | partial $\eta^2=0.131$ |
| Time                | F(1.55,48.15)=0.003 | p=0.990           | partial $\eta^2=0.000$ |
| Time × Sex          | F(1.55,48.15)=2.408 | p=0.113           | partial $\eta^2=0.072$ |
| Time × Diet         | F(1.55,48.15)=0.225 | p=0.743           | partial $\eta^2=0.007$ |
| Sex × Diet          | F(1,31)=0.193       | p=0.663           | partial $\eta^2=0.006$ |
| Time × Sex × Diet   | F(1.55,48.15)=1.253 | p=0.288           | partial $\eta^2=0.039$ |

S31B Table

| <b>Experiment 2</b> | <b>kcal/day</b>     |                   |                        |
|---------------------|---------------------|-------------------|------------------------|
| Sex                 | F(1,29)=20.20       | <b>p&lt;0.001</b> | partial $\eta^2=0.411$ |
| Diet                | F(1,29)=6.500       | p=0.016           | partial $\eta^2=0.183$ |
| Time                | F(3.19,92.45)=3.755 | p=0.012           | partial $\eta^2=0.115$ |
| Time × Sex          | F(3.19,92.45)=0.524 | p=0.678           | partial $\eta^2=0.018$ |
| Time × Diet         | F(3.19,92.45)=4.385 | <b>p=0.005</b>    | partial $\eta^2=0.131$ |
| Sex × Diet          | F(1,29)=0.433       | p=0.516           | partial $\eta^2=0.015$ |
| Time × Sex × Diet   | F(3.19,92.45)=0.359 | p=0.795           | partial $\eta^2=0.012$ |

S31C Table

| <b>Experiment 3</b> | <b>kcal/day</b>     |                   |                        |
|---------------------|---------------------|-------------------|------------------------|
| Sex                 | F(1,28)=24.96       | <b>p&lt;0.001</b> | partial $\eta^2=0.471$ |
| Diet                | F(1,28)=5.135       | <b>p=0.031</b>    | partial $\eta^2=0.155$ |
| Time                | F(2.77,77.66)=1.733 | p=0.171           | partial $\eta^2=0.058$ |
| Time × Sex          | F(2.77,77.66)=1.512 | p=0.220           | partial $\eta^2=0.051$ |
| Time × Diet         | F(2.77,77.66)=1.539 | p=0.214           | partial $\eta^2=0.052$ |
| Sex × Diet          | F(1,28)=0.916       | p=0.347           | partial $\eta^2=0.032$ |
| Time × Sex × Diet   | F(2.77,77.66)=1.162 | p=0.328           | partial $\eta^2=0.040$ |

**S32 Table. Three-way repeated measures ANOVAs on weekly average kcal consumed as a percentage of body weight by control no shock mice across Experiments.**

S32A Table

| <b>Experiment 1</b> | <b>Kcal as % BW</b> |                |                                 |
|---------------------|---------------------|----------------|---------------------------------|
| Sex                 | F(1,31)=0.151       | p=0.700        | partial $\eta^2$ =0.005         |
| Diet                | F(1,31)=3.279       | p=0.080        | partial $\eta^2$ =0.096         |
| Time                | F(1.65,51.04)=1.353 | p=0.265        | partial $\eta^2$ =0.042         |
| Time × Sex          | F(1.65,51.04)=3.592 | <b>p=0.043</b> | partial $\eta^2$ = <b>0.104</b> |
| Time × Diet         | F(1.65,51.04)=0.089 | p=0.880        | partial $\eta^2$ =0.003         |
| Sex × Diet          | F(1,31)=0.348       | p=0.560        | partial $\eta^2$ =0.011         |
| Time × Sex × Diet   | F(1.65,51.04)=1.194 | p=0.304        | partial $\eta^2$ =0.037         |

S32B Table

| <b>Experiment 2</b> | <b>Kcal as % BW</b> |                |                                 |
|---------------------|---------------------|----------------|---------------------------------|
| Sex                 | F(1,29)=7.328       | <b>p=0.011</b> | partial $\eta^2$ = <b>0.202</b> |
| Diet                | F(1,29)=1.017       | p=0.322        | partial $\eta^2$ =0.034         |
| Time                | F(2.59,75.20)=1.345 | p=0.267        | partial $\eta^2$ =0.044         |
| Time × Sex          | F(2.59,75.20)=0.667 | p=0.554        | partial $\eta^2$ =0.022         |
| Time × Diet         | F(2.59,75.20)=4.208 | <b>p=0.011</b> | partial $\eta^2$ = <b>0.127</b> |
| Sex × Diet          | F(1,29)=0.014       | p=0.906        | partial $\eta^2$ =0.000         |
| Time × Sex × Diet   | F(2.59,75.20)=0.430 | p=0.704        | partial $\eta^2$ =0.015         |

S32C Table

| <b>Experiment 3</b> | <b>Kcal as % BW</b> |                |                                 |
|---------------------|---------------------|----------------|---------------------------------|
| Sex                 | F(1,28)=0.431       | p=0.517        | partial $\eta^2$ =0.015         |
| Diet                | F(1,28)=4.291       | <b>p=0.048</b> | partial $\eta^2$ = <b>0.133</b> |
| Time                | F(3.02,84.44)=3.121 | <b>p=0.030</b> | partial $\eta^2$ = <b>0.100</b> |
| Time × Sex          | F(3.02,84.44)=1.336 | p=0.268        | partial $\eta^2$ =0.046         |
| Time × Diet         | F(3.02,84.44)=1.945 | p=0.128        | partial $\eta^2$ =0.065         |
| Sex × Diet          | F(1,28)=2.776       | p=0.107        | partial $\eta^2$ =0.090         |
| Time × Sex × Diet   | F(3.02,84.44)=0.648 | p=0.587        | partial $\eta^2$ =0.023         |

S22 Figure

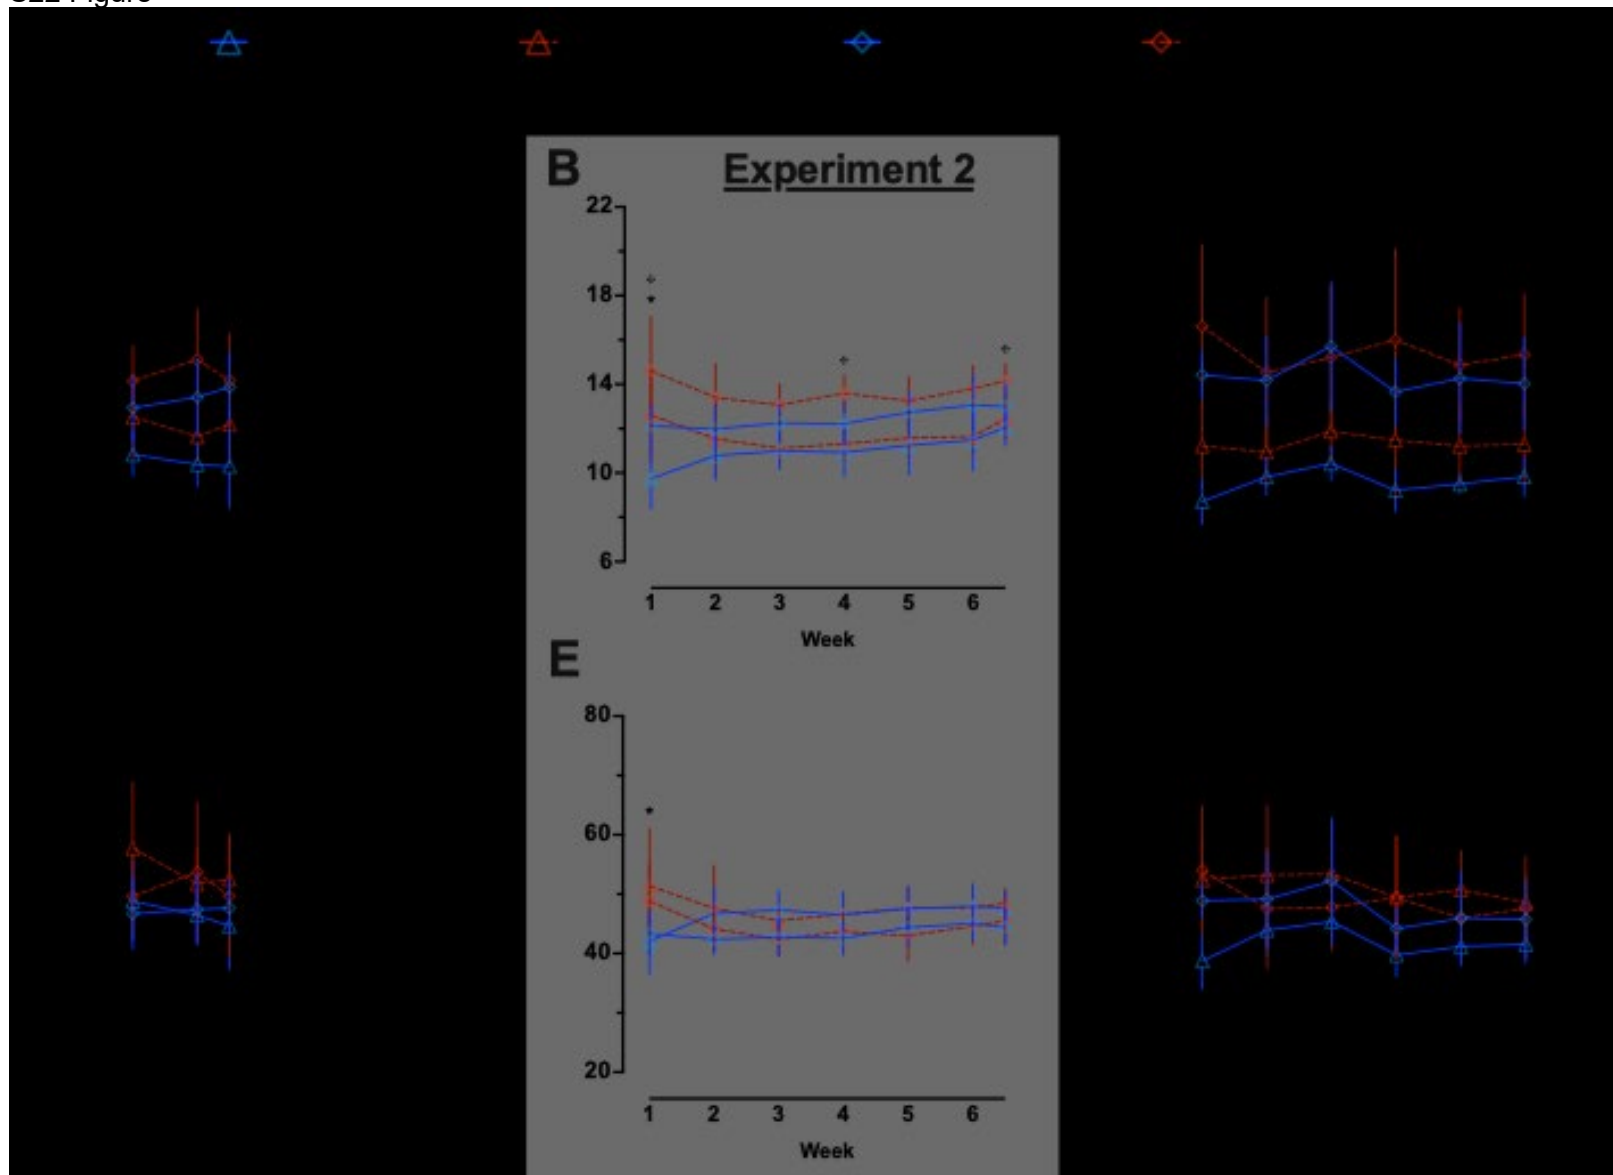



**S22 Fig. Average kcal consumed per day and kcal consumed as a percentage of body weight by control no shock mice across Experiments.**

Females represented by triangles, males by diamonds; 0.4% NaCl represented by blue symbols and solid lines, 4.0% NaCl represented by red symbols and dashed lines. A, B, C)

Consumption of kcal per day and D, E, F) kcal consumption as a percentage of body weight were calculated for each full week, and for the partial week at the conclusion of A, D)

Experiment 1 and B, E) Experiment 2 (grey shading). Some data loss occurred on the very last weighing day for a subset of animals in C, F) Experiment 3, thus graphs and repeated measures statistical analyses for Experiment 3 calculations cease at week 6 to maximize inclusion of mice

in repeated measures analyses. Experiment 1: 0.4% NaCl females, n=9; 4.0% NaCl females, n=9; 0.4% NaCl males, n=8; 4.0% NaCl males, n=9. Experiment 2: 0.4% NaCl females, n=8;

4.0% NaCl females, n=7; 0.4% NaCl males, n=9; 4.0% NaCl males, n=9. Experiment 3: 0.4% NaCl females, n=8; 4.0% NaCl females, n=8; 0.4% NaCl males, n=8; 4.0% NaCl males, n=8.

Data are graphed as mean  $\pm$  95% confidence interval. \*p<0.05, \*\*p<0.01, \*\*\*p<0.001 indicate difference between females consuming 0.4% NaCl versus 4.0% NaCl. +p<0.05, ++p<0.01,

+++p<0.001 indicate difference between males consuming 0.4% NaCl versus 4.0% NaCl.

S23 Figure

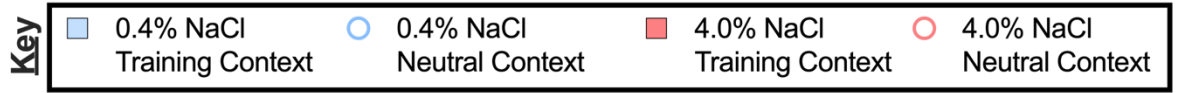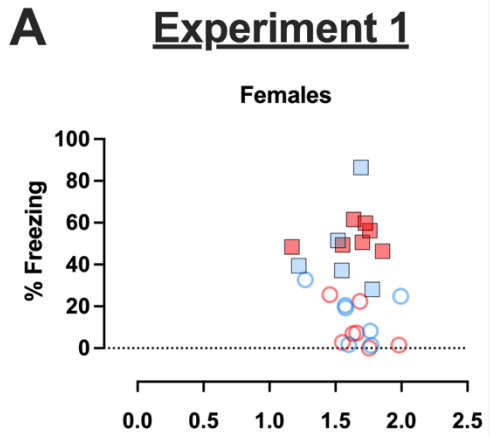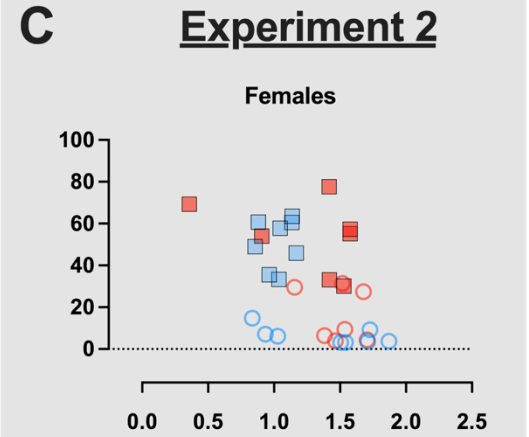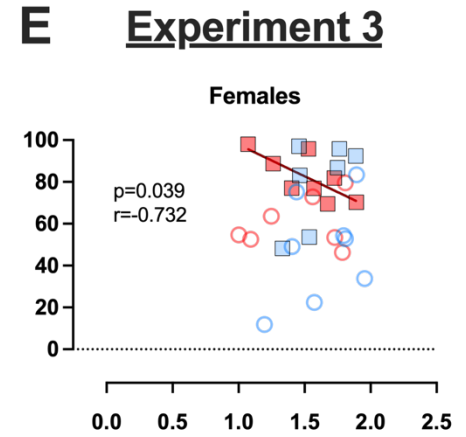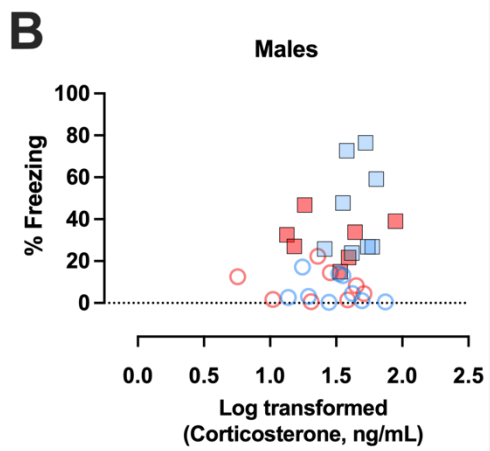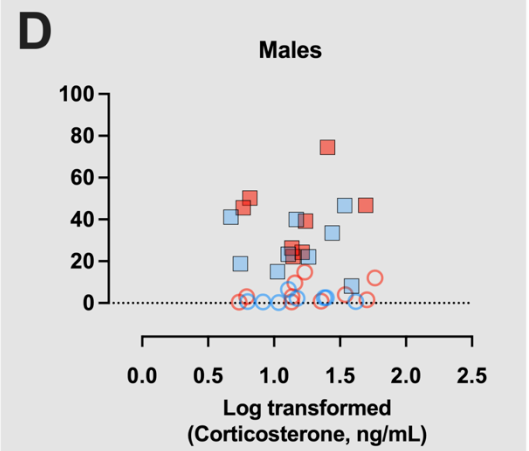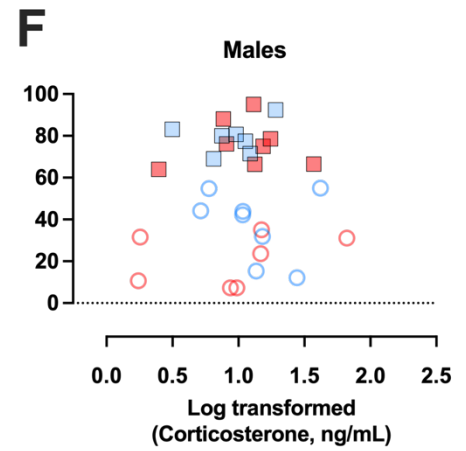

**S23 Fig. Correlations between context fear expression and log-transformed serum corticosterone levels across contexts and Experiments.**

Mice assigned to 0.4% NaCl represented by blue symbols, mice assigned to 4.0% NaCl represented by red symbols; mice tested in Training Context represented by squares, mice tested in Neutral Context represented by circles. Individual log-transformed serum corticosterone levels were plotted on the x-axis against the same individual's contextual fear expression during minutes two through six of the 10 min testing session plotted on the y-axis. Data for each sex were graphed for A, B) Experiment 1, C, D) Experiment 2 (grey shading), and E, F) Experiment 3. Significant correlation indicated with solid line (female). Experiment 1: 0.4% NaCl females Training Context, n=5; 0.4% NaCl females Neutral Context, n=7; 4.0% NaCl females Training Context, n=7; 4.0% NaCl females Neutral Context, n=7; 0.4% NaCl males Training Context, n=8; 0.4% NaCl males Neutral Context, n=9; 4.0% NaCl males Training Context, n=7; 4.0% NaCl males Neutral Context, n=8. Experiment 2: 0.4% NaCl females Training Context, n=8; 0.4% NaCl females Neutral Context, n=8; 4.0% NaCl females Training Context, n=7; 4.0% NaCl females Neutral Context, n=7; 0.4% NaCl males Training Context, n=9; 0.4% NaCl males Neutral Context, n=8; 4.0% NaCl males Training Context, n=8; 4.0% NaCl males Neutral Context, n=10. Experiment 3: 0.4% NaCl females Training Context, n=7; 0.4% NaCl females Neutral Context, n=8; 4.0% NaCl females Training Context, n=8; 4.0% NaCl females Neutral Context, n=7; 0.4% NaCl males Training Context, n=7; 0.4% NaCl males Neutral Context, n=8; 4.0% NaCl males Training Context, n=8; 4.0% NaCl males Neutral Context, n=7.

S24 Figure

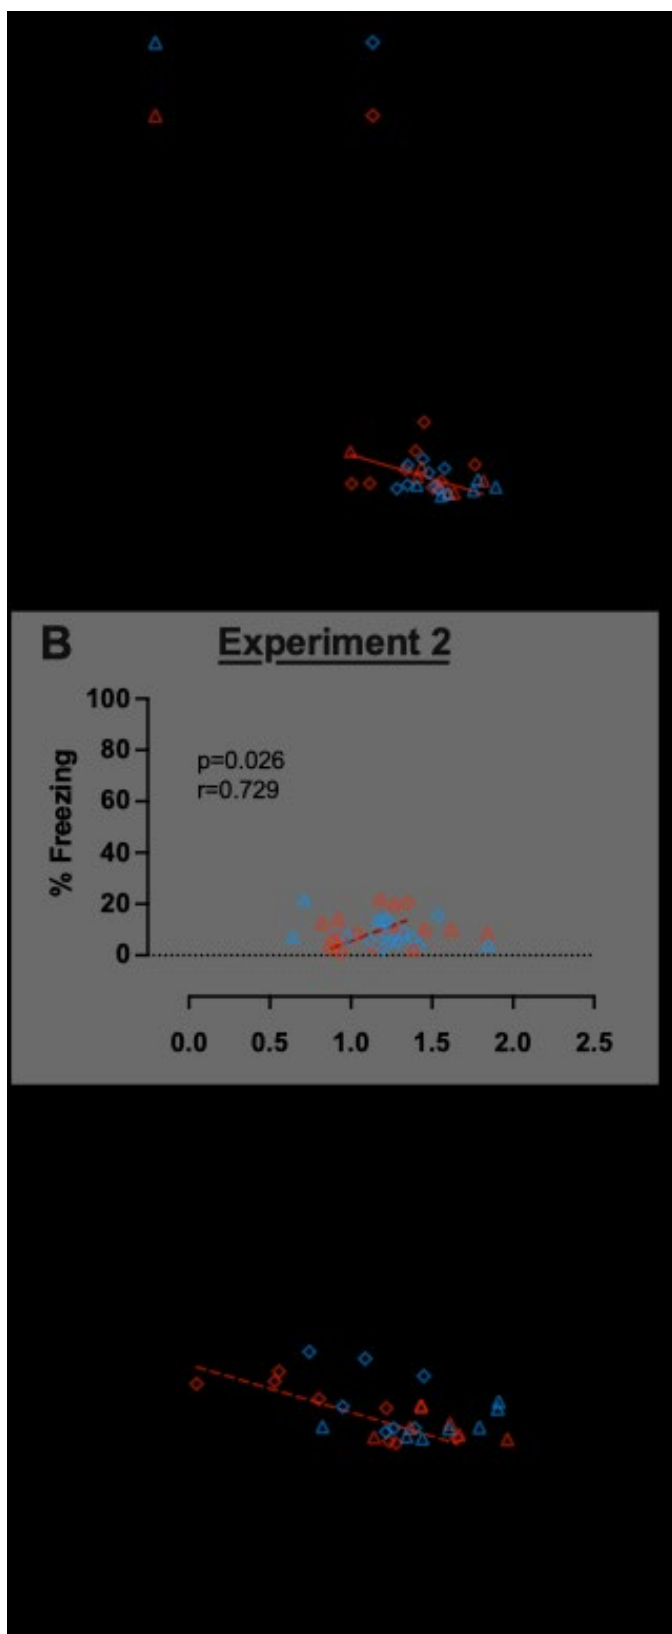

**S24 Figure. Correlations between context fear expression and log-transformed serum corticosterone levels in control no shock mice across Experiments.**

Females represented by triangles, males by diamonds; 0.4% NaCl represented by blue symbols, 4.0% NaCl represented by red symbols. Individual log-transformed serum corticosterone levels were plotted on the x-axis against the same individual's contextual fear expression during minutes two through six of the 10 min testing session plotted on the y-axis. Data for each sex of control no shock mice were graphed for A) Experiment 1, B) Experiment 2 (grey shading), and C) Experiment 3. Significant correlations indicated with solid (female) or dashed (male) lines. Experiment 1: 0.4% NaCl females, n=6; 4.0% NaCl females, n=7; 0.4% NaCl males, n=8; 4.0% NaCl males, n=8. Experiment 2: 0.4% NaCl females, n=7; 4.0% NaCl females, n=8; 0.4% NaCl males, n=9; 4.0% NaCl males, n=9. Experiment 3: 0.4% NaCl females, n=7; 4.0% NaCl females, n=7; 0.4% NaCl males, n=7; 4.0% NaCl males, n=8.

**S33 Table. Details of confirmed outliers (> 5 standard deviations (SD) ± average of data set sans suspected outlier) within respective data sets. Outliers are marked with red font.**

S33A Table

| Male • Experiment 3 • 0.4%NaCl<br>No Shock • Training Context • Training baseline |       |                       |
|-----------------------------------------------------------------------------------|-------|-----------------------|
| Animal ID                                                                         | Data  | Outlier Determination |
| 0445                                                                              | 6.36  |                       |
| 0447                                                                              | 8.93  |                       |
| 0514                                                                              | 24.01 | >6 SD beyond mean     |
| 0519                                                                              | 0.88  | 2.66 Avg              |
| 0523                                                                              | 0.69  | 3.54 SD               |
| 0529                                                                              | 0.00  | 23.88 Avg + 6 SD      |
| 0697                                                                              | 0.00  |                       |
| 0796                                                                              | 1.75  |                       |

S33B Table

| Male • Experiment 1 • 4.0%NaCl<br>No Shock • Training Context • Testing |       |                       |
|-------------------------------------------------------------------------|-------|-----------------------|
| Animal ID                                                               | Data  | Outlier Determination |
| 0331                                                                    | 30.21 |                       |
| 0345                                                                    | 18.41 |                       |
| 0352                                                                    | 75.65 | >7 SD beyond mean     |
| 0377                                                                    | 3.63  |                       |
| 0388                                                                    | 10.92 | 11.56 Avg             |
| 0391                                                                    | 6.03  | 9.04 SD               |
| 0409                                                                    | 5.15  | 74.81 Avg + 7 SD      |
| 0415                                                                    | 12.92 |                       |
| 0422                                                                    | 5.24  |                       |

S33C Table

| Male • Experiment 1 • 4.0%NaCl<br>Shock • Training Context • Testing |       |                       |
|----------------------------------------------------------------------|-------|-----------------------|
| Animal ID                                                            | Data  | Outlier Determination |
| 0342                                                                 | 86.01 | >5 SD beyond mean     |

|      |       |       |                   |
|------|-------|-------|-------------------|
| 0344 | 39.07 | 30.84 | <i>Avg</i>        |
| 0357 | 33.78 | 10.65 | <i>SD</i>         |
| 0367 | 21.75 | 84.09 | <i>Avg + 5 SD</i> |
| 0387 | 14.97 |       |                   |
| 0413 | 32.57 |       |                   |
| 0416 | 46.73 |       |                   |
| 0423 | 27.04 |       |                   |

S33D Table

| Female • Experiment 2 • 0.4%NaCl<br>Shock • Neutral Context • Testing |       |                             |                   |
|-----------------------------------------------------------------------|-------|-----------------------------|-------------------|
| Animal ID                                                             | Data  | Outlier Determination       |                   |
| 0608                                                                  | 3.56  |                             |                   |
| 0610                                                                  | 9.26  |                             |                   |
| 0613                                                                  | 3.16  |                             |                   |
| 0622                                                                  | 6.15  |                             |                   |
| 0626                                                                  | 3.12  | 6.35                        | <i>Avg</i>        |
| 0667                                                                  | 3.71  | 4.05                        | <i>SD</i>         |
| 0677                                                                  | 7.10  | 30.63                       | <i>Avg + 6 SD</i> |
| 0678                                                                  | 14.73 |                             |                   |
| 0682                                                                  | 32.69 | <b>&gt;6 SD beyond mean</b> |                   |

S33E Table

| Male • Experiment 2 • 0.4%NaCl<br>Shock • Neutral Context • Testing |       |                              |                    |
|---------------------------------------------------------------------|-------|------------------------------|--------------------|
| Animal ID                                                           | Data  | Outlier Determination        |                    |
| 0445                                                                | 2.31  |                              |                    |
| 0447                                                                | 2.58  |                              |                    |
| 0514                                                                | 0.58  | 2.04                         | <i>Avg</i>         |
| 0519                                                                | 6.52  | 2.05                         | <i>SD</i>          |
| 0523                                                                | 0.76  | 26.61                        | <i>Avg + 12 SD</i> |
| 0529                                                                | 2.57  |                              |                    |
| 0697                                                                | 27.97 | <b>&gt;12 SD beyond mean</b> |                    |
| 0796                                                                | 0.27  |                              |                    |
| 0807                                                                | 0.75  |                              |                    |

S33F Table

| Male • Experiment 3 • 0.4%NaCl<br>Shock • Training Context • Testing |       |                             |                   |
|----------------------------------------------------------------------|-------|-----------------------------|-------------------|
| Animal ID                                                            | Data  | Outlier Determination       |                   |
| 0073                                                                 | 69.01 | 79.18                       | <i>Avg</i>        |
| 0187                                                                 | 80.66 | 7.74                        | <i>SD</i>         |
| 0278                                                                 | 83.16 | 40.46                       | <i>Avg - 5 SD</i> |
| 0312                                                                 | 80.07 |                             |                   |
| 0324                                                                 | 77.38 |                             |                   |
| 0428                                                                 | 92.45 |                             |                   |
| 0434                                                                 | 38.13 | <b>&gt;5 SD beyond mean</b> |                   |
| 0436                                                                 | 71.55 |                             |                   |

S33G Table

| Male • Experiment 3 • 4.0%NaCl<br>Osmolality |      |                             |                   |
|----------------------------------------------|------|-----------------------------|-------------------|
| Animal ID                                    | Data | Outlier Determination       |                   |
| 0077                                         | 338  | <b>&gt;7 SD beyond mean</b> |                   |
| 0188                                         | 315  |                             |                   |
| 0306                                         | 316  |                             |                   |
| 0311                                         | 322  | 316.29                      | <i>Avg</i>        |
| 0322                                         | 314  | 2.87                        | <i>SD</i>         |
| 0427                                         | 318  | 336.38                      | <i>Avg + 7 SD</i> |
| 0435                                         | 314  |                             |                   |
| 0438                                         | 315  |                             |                   |

S33H Table

| Female • Experiment 1 • 0.4%NaCl<br>No Shock • Training Context • Corticosterone Log |      |                             |                   |
|--------------------------------------------------------------------------------------|------|-----------------------------|-------------------|
| Animal ID                                                                            | Data | Outlier Determination       |                   |
| 0394                                                                                 | 1.67 |                             |                   |
| 0531                                                                                 | 1.84 |                             |                   |
| 0539                                                                                 | 1.99 |                             |                   |
| 0544                                                                                 | 1.64 | 1.75                        | <i>Avg</i>        |
| 0550                                                                                 | 1.48 | 0.19                        | <i>SD</i>         |
| 0556                                                                                 | 1.87 | 0.82                        | <i>Avg - 5 SD</i> |
| 0642                                                                                 | 0.79 | <b>&gt;5 SD beyond mean</b> |                   |

S33I Table



| Female • Experiment 2 • 0.4%NaCl<br>Shock • Training Context • Corticosterone Log |             |                             |
|-----------------------------------------------------------------------------------|-------------|-----------------------------|
| Animal ID                                                                         | Data        | Outlier Determination       |
| 0616                                                                              | 1.13        |                             |
| <b>0618</b>                                                                       | <b>1.94</b> | <b>&gt;7 SD beyond mean</b> |
| 0620                                                                              | 1.17        |                             |
| 0625                                                                              | 0.86        | 1.03 <i>Avg</i>             |
| 0628                                                                              | 0.88        | 0.12 <i>SD</i>              |
| 0676                                                                              | 1.05        | 1.86 <i>Avg + 7 SD</i>      |
| 0681                                                                              | 1.14        |                             |
| 0683                                                                              | 1.04        |                             |
| 0771                                                                              | 0.96        |                             |

S33J Table

| Male • Experiment 1 • 0.4%NaCl • Shock<br>Training Context • Water:NaCl Ratio Wk 1 |              |                             |
|------------------------------------------------------------------------------------|--------------|-----------------------------|
| Animal ID                                                                          | Data         | Outlier Determination       |
| 0341                                                                               | 333.63       |                             |
| 0353                                                                               | 153.57       |                             |
| <b>0354</b>                                                                        | <b>441.7</b> | <b>&gt;6 SD beyond mean</b> |
| 0368                                                                               | 229.87       |                             |
| 0389                                                                               | 218.90       | 231.82 <i>Avg</i>           |
| 0407                                                                               | 218.37       | 34.28 <i>SD</i>             |
| 0417                                                                               | 257.84       | 437.51 <i>Avg + 6 SD</i>    |
| 0419                                                                               | 210.53       |                             |

S33K Table

| Male • Experiment 1 • 0.4%NaCl • Shock<br>Neutral Context • Water:NaCl Ratio Wk 2 |                |                             |
|-----------------------------------------------------------------------------------|----------------|-----------------------------|
| Animal ID                                                                         | Data           | Outlier Determination       |
| 0333                                                                              | 349.81         | 346.46 <i>Avg</i>           |
| 0343                                                                              | 342.23         | 84.92 <i>SD</i>             |
| 0350                                                                              | 301.87         | 1110.78 <i>Avg + 9 SD</i>   |
| 0358                                                                              | 262.82         |                             |
| 0376                                                                              | 383.72         |                             |
| 0390                                                                              | 486.90         |                             |
| <b>0408</b>                                                                       | <b>1127.25</b> | <b>&gt;5 SD beyond mean</b> |
| 0418                                                                              | 224.22         |                             |

|      |        |
|------|--------|
| 0421 | 420.07 |
|------|--------|

S33L Table

| Male • Experiment 1 • 0.4%NaCl • Shock<br>Neutral Context • Water:NaCl Ratio Wk 3 |        |                       |                    |
|-----------------------------------------------------------------------------------|--------|-----------------------|--------------------|
| Animal ID                                                                         | Data   | Outlier Determination |                    |
| 0333                                                                              | 302.97 | 275.09                | <i>Avg</i>         |
| 0343                                                                              | 258.75 | 47.54                 | <i>SD</i>          |
| 0350                                                                              | 272.09 | 1225.95               | <i>Avg + 20 SD</i> |
| 0358                                                                              | 188.51 |                       |                    |
| 0376                                                                              | 320.86 |                       |                    |
| 0390                                                                              | 258.38 |                       |                    |
| 0408                                                                              | 1228.7 | >20 SD beyond mean    |                    |
| 0418                                                                              | 256.58 |                       |                    |
| 0421                                                                              | 342.59 |                       |                    |

S33M Table

| Male • Experiment 1 • 4.0%NaCl • Shock<br>Neutral Context • Water:NaCl Ratio Wk 2.5 |        |                       |                   |
|-------------------------------------------------------------------------------------|--------|-----------------------|-------------------|
| Animal ID                                                                           | Data   | Outlier Determination |                   |
| 0329                                                                                | 75.44  | 64.79                 | <i>Avg</i>        |
| 0332                                                                                | 59.85  | 9.38                  | <i>SD</i>         |
| 0340                                                                                | 65.41  | 139.82                | <i>Avg + 8 SD</i> |
| 0351                                                                                | 140.65 | >8 SD beyond mean     |                   |
| 0371                                                                                | 75.72  |                       |                   |
| 0411                                                                                | 68.95  |                       |                   |
| 0412                                                                                | 57.52  |                       |                   |
| 0420                                                                                | 50.65  |                       |                   |

S33N Table

| Female • Experiment 2 • 0.4%NaCl • Shock<br>Training Context • Water:NaCl Ratio Wk 4 |        |                       |  |
|--------------------------------------------------------------------------------------|--------|-----------------------|--|
| Animal ID                                                                            | Data   | Outlier Determination |  |
| 0616                                                                                 | 375.63 |                       |  |
| 0618                                                                                 | 900.00 | >5 SD beyond mean     |  |
| 0620                                                                                 | 433.96 |                       |  |
| 0625                                                                                 | 309.68 |                       |  |

|      |        |        |                   |
|------|--------|--------|-------------------|
| 0628 | 376.56 | 424.32 | <i>Avg</i>        |
| 0676 | 474.04 | 86.14  | <i>SD</i>         |
| 0681 | 377.40 | 855.01 | <i>Avg + 5 SD</i> |
| 0683 | 454.14 |        |                   |
| 0771 | 593.11 |        |                   |

S33O Table

| Male • Experiment 2 • 0.4%NaCl • Shock<br>Training Context • Water:NaCl Ratio Wk 2 |        |                             |                   |
|------------------------------------------------------------------------------------|--------|-----------------------------|-------------------|
| Animal ID                                                                          | Data   | Outlier Determination       |                   |
| 0451                                                                               | 310.26 | 329.64                      | <i>Avg</i>        |
| 0453                                                                               | 364.10 | 81.02                       | <i>SD</i>         |
| 0802                                                                               | 243.72 | 815.77                      | <i>Avg + 6 SD</i> |
| 0512                                                                               | 257.58 |                             |                   |
| 0516                                                                               | 234.38 |                             |                   |
| 0520                                                                               | 459.49 |                             |                   |
| 0526                                                                               | 381.22 |                             |                   |
| 0702                                                                               | 386.36 |                             |                   |
| 0795                                                                               | 848.89 | <b>&gt;6 SD beyond mean</b> |                   |

S33P Table

| Female • Experiment 3 • 0.4%NaCl • Shock<br>Neutral Context • Water:NaCl Ratio Wk 2 |        |                             |                   |
|-------------------------------------------------------------------------------------|--------|-----------------------------|-------------------|
| Animal ID                                                                           | Data   | Outlier Determination       |                   |
| 0559                                                                                | 777.14 | <b>&gt;5 SD beyond mean</b> |                   |
| 0568                                                                                | 443.72 | 329.34                      | <i>Avg</i>        |
| 0570                                                                                | 416.26 | 74.83                       | <i>SD</i>         |
| 0589                                                                                | 245.56 | 703.51                      | <i>Avg + 5 SD</i> |
| 0591                                                                                | 257.72 |                             |                   |
| 0651                                                                                | 270.49 |                             |                   |
| 0656                                                                                | 341.22 |                             |                   |
| 0663                                                                                | 367.35 |                             |                   |
| 0664                                                                                | 292.40 |                             |                   |

S33Q Table

| Female • Experiment 3 • 4.0%NaCl • Shock<br>Neutral Context • Water:NaCl Ratio Wk 4 |  |  |  |
|-------------------------------------------------------------------------------------|--|--|--|
|-------------------------------------------------------------------------------------|--|--|--|

| Animal ID | Data   | Outlier Determination       |                   |
|-----------|--------|-----------------------------|-------------------|
| 0561      | 75.48  | 75.50                       | <i>Avg</i>        |
| 0563      | 80.97  | 7.02                        | <i>SD</i>         |
| 0567      | 70.87  | 110.58                      | <i>Avg + 5 SD</i> |
| 0573      | 111.94 | <b>&gt;5 SD beyond mean</b> |                   |
| 0586      | 76.37  |                             |                   |
| 0660      | 87.56  |                             |                   |
| 0662      | 67.32  |                             |                   |
| 0665      | 69.94  |                             |                   |
