# Supplementary material for: Generalization of contextual fear is sex-specifically affected by high salt intake
Source: PubMed Central journal article supplement (PMC10343085; doi:10.1371/journal.pone.0286221), 2023-07-13
Supplement: pone.0286221.s028.pdf [file pone.0286221.s028.pdf]

## Supplemental Material for

Generalization of contextual fear is sex-specifically affected by high salt intake

Jasmin N. Beaver<sup>1,2</sup>, Brady L. Weber<sup>1,2</sup>, Matthew T. Ford<sup>1</sup>, Anna E. Anello<sup>1,2</sup>, Kaden M. Ruffin<sup>1</sup>,  
Sarah K. Kassis<sup>1,2</sup>, T. Lee Gilman<sup>1,2,3\*</sup>

<sup>1</sup>Department of Psychological Sciences, Kent State University, Kent, Ohio, United States of America

<sup>2</sup>Brain Health Research Institute, Kent State University, Kent, Ohio, United States of America

<sup>3</sup>Healthy Communities Research Institute, Kent State University, Kent, Ohio, United States of America

\*Corresponding Author

Email: [lgilman1@kent.edu](mailto:lgilman1@kent.edu) (TLG)

**S28 Table. Three-way repeated measures ANOVAs on weekly average NaCl consumed per day by control no shock mice across Experiments.**

S28A Table

| <b>Experiment 1</b> | <b>NaCl/day</b>     |                |                                 |
|---------------------|---------------------|----------------|---------------------------------|
| Sex                 | F(1,31)=6.870       | p=0.013        | partial $\eta^2$ =0.181         |
| Diet                | F(1,31)=585.5       | p<0.001        | partial $\eta^2$ =0.950         |
| Time                | F(1.55,47.89)=0.069 | p=0.890        | partial $\eta^2$ =0.002         |
| Time × Sex          | F(1.55,47.89)=1.907 | p=0.168        | partial $\eta^2$ =0.058         |
| Time × Diet         | F(1.55,47.89)=0.103 | p=0.853        | partial $\eta^2$ =0.003         |
| Sex × Diet          | F(1,31)=4.262       | <b>p=0.047</b> | partial $\eta^2$ = <b>0.121</b> |
| Time × Sex × Diet   | F(1.55,47.89)=1.733 | p=0.193        | partial $\eta^2$ =0.053         |

S28B Table

| <b>Experiment 2</b> | <b>NaCl/day</b>     |                |                                 |
|---------------------|---------------------|----------------|---------------------------------|
| Sex                 | F(1,29)=14.80       | p<0.001        | partial $\eta^2$ =0.338         |
| Diet                | F(1,29)=1821        | p<0.001        | partial $\eta^2$ =0.984         |
| Time                | F(2.40,69.59)=3.232 | p=0.037        | partial $\eta^2$ =0.100         |
| Time × Sex          | F(2.40,69.59)=0.157 | p=0.889        | partial $\eta^2$ =0.005         |
| Time × Diet         | F(2.40,69.59)=3.330 | <b>p=0.033</b> | partial $\eta^2$ = <b>0.103</b> |
| Sex × Diet          | F(1,29)=11.10       | <b>p=0.002</b> | partial $\eta^2$ = <b>0.277</b> |
| Time × Sex × Diet   | F(2.40,69.59)=0.132 | p=0.909        | partial $\eta^2$ =0.005         |

S28C Table

| <b>Experiment 3</b> | <b>NaCl/day</b>     |                |                                 |
|---------------------|---------------------|----------------|---------------------------------|
| Sex                 | F(1,28)=6.847       | p=0.014        | partial $\eta^2$ =0.196         |
| Diet                | F(1,28)=318.3       | p<0.001        | partial $\eta^2$ =0.919         |
| Time                | F(2.37,66.44)=0.759 | p=0.493        | partial $\eta^2$ =0.026         |
| Time × Sex          | F(2.37,66.44)=1.633 | p=0.199        | partial $\eta^2$ =0.055         |
| Time × Diet         | F(2.37,66.44)=0.729 | p=0.508        | partial $\eta^2$ =0.025         |
| Sex × Diet          | F(1,28)=3.864       | <b>p=0.059</b> | partial $\eta^2$ = <b>0.121</b> |
| Time × Sex × Diet   | F(2.37,66.44)=1.580 | p=0.210        | partial $\eta^2$ =0.053         |
