# Supplementary material for: Generalization of contextual fear is sex-specifically affected by high salt intake
Source: PubMed Central journal article supplement (PMC10343085; doi:10.1371/journal.pone.0286221), 2023-07-13
Supplement: pone.0286221.s029.pdf [file pone.0286221.s029.pdf]

## Supplemental Material for

Generalization of contextual fear is sex-specifically affected by high salt intake

Jasmin N. Beaver<sup>1,2</sup>, Brady L. Weber<sup>1,2</sup>, Matthew T. Ford<sup>1</sup>, Anna E. Anello<sup>1,2</sup>, Kaden M. Ruffin<sup>1</sup>,  
Sarah K. Kassis<sup>1,2</sup>, T. Lee Gilman<sup>1,2,3\*</sup>

<sup>1</sup>Department of Psychological Sciences, Kent State University, Kent, Ohio, United States of America

<sup>2</sup>Brain Health Research Institute, Kent State University, Kent, Ohio, United States of America

<sup>3</sup>Healthy Communities Research Institute, Kent State University, Kent, Ohio, United States of America

\*Corresponding Author

Email: [lgilman1@kent.edu](mailto:lgilman1@kent.edu) (TLG)

**S29 Table. Three-way repeated measures ANOVAs on weekly NaCl consumed as a percentage of body weight by control no shock mice across Experiments.**

S29A Table

| <b>Experiment 1</b> | <b>NaCl as % BW</b> |                |                                          |
|---------------------|---------------------|----------------|------------------------------------------|
| Sex                 | F(1,31)=0.304       | p=0.585        | partial $\eta^2$ =0.010                  |
| Diet                | F(1,31)=323.9       | p<0.001        | partial $\eta^2$ =0.913                  |
| Time                | F(1.52,47.12)=0.936 | p=0.376        | partial $\eta^2$ =0.029                  |
| Time × Sex          | F(1.52,47.12)=3.195 | p=0.063        | partial $\eta^2$ =0.093                  |
| Time × Diet         | F(1.52,47.12)=0.743 | p=0.447        | partial $\eta^2$ =0.023                  |
| Sex × Diet          | F(1,31)=0.329       | p=0.570        | partial $\eta^2$ =0.011                  |
| Time × Sex × Diet   | F(1.52,47.12)=2.829 | <b>p=0.083</b> | <b>partial <math>\eta^2</math>=0.084</b> |

S29B Table

| <b>Experiment 2</b> | <b>NaCl as % BW</b> |                |                                          |
|---------------------|---------------------|----------------|------------------------------------------|
| Sex                 | F(1,29)=4.453       | p=0.044        | partial $\eta^2$ =0.133                  |
| Diet                | F(1,29)=2475        | p<0.001        | partial $\eta^2$ =0.988                  |
| Time                | F(1.92,55.69)=2.794 | p=0.072        | partial $\eta^2$ =0.088                  |
| Time × Sex          | F(1.92,55.69)=0.109 | p=0.889        | partial $\eta^2$ =0.004                  |
| Time × Diet         | F(1.92,55.69)=3.222 | <b>p=0.049</b> | <b>partial <math>\eta^2</math>=0.100</b> |
| Sex × Diet          | F(1,29)=3.125       | <b>p=0.088</b> | <b>partial <math>\eta^2</math>=0.097</b> |
| Time × Sex × Diet   | F(1.92,55.69)=0.074 | p=0.923        | partial $\eta^2$ =0.003                  |

S29C Table

| <b>Experiment 3</b> | <b>NaCl as % BW</b> |                   |                                          |
|---------------------|---------------------|-------------------|------------------------------------------|
| Sex                 | F(1,28)=0.211       | p=0.649           | partial $\eta^2$ =0.007                  |
| Diet                | F(1,28)=438.4       | <b>p&lt;0.001</b> | <b>partial <math>\eta^2</math>=0.940</b> |
| Time                | F(2.91,81.55)=1.500 | p=0.222           | partial $\eta^2$ =0.051                  |
| Time × Sex          | F(2.91,81.55)=1.040 | p=0.378           | partial $\eta^2$ =0.036                  |
| Time × Diet         | F(2.91,81.55)=1.330 | p=0.271           | partial $\eta^2$ =0.045                  |
| Sex × Diet          | F(1,28)=0.521       | p=0.476           | partial $\eta^2$ =0.018                  |
| Time × Sex × Diet   | F(2.91,81.55)=0.940 | p=0.423           | partial $\eta^2$ =0.032                  |
