# Supplementary material for: Generalization of contextual fear is sex-specifically affected by high salt intake
Source: PubMed Central journal article supplement (PMC10343085; doi:10.1371/journal.pone.0286221), 2023-07-13
Supplement: pone.0286221.s030.pdf [file pone.0286221.s030.pdf]

## Supplemental Material for

Generalization of contextual fear is sex-specifically affected by high salt intake

Jasmin N. Beaver<sup>1,2</sup>, Brady L. Weber<sup>1,2</sup>, Matthew T. Ford<sup>1</sup>, Anna E. Anello<sup>1,2</sup>, Kaden M. Ruffin<sup>1</sup>,  
Sarah K. Kassis<sup>1,2</sup>, T. Lee Gilman<sup>1,2,3\*</sup>

<sup>1</sup>Department of Psychological Sciences, Kent State University, Kent, Ohio, United States of America

<sup>2</sup>Brain Health Research Institute, Kent State University, Kent, Ohio, United States of America

<sup>3</sup>Healthy Communities Research Institute, Kent State University, Kent, Ohio, United States of America

\*Corresponding Author

Email: [lgilman1@kent.edu](mailto:lgilman1@kent.edu) (TLG)

**S30 Table. Three-way repeated measures ANOVAs on weekly water to NaCl ratio consumed by control no shock mice across Experiments.**

S30A Table

| <b>Experiment 1</b> | <b>Water:NaCl Ratio</b> |                   |                                 |
|---------------------|-------------------------|-------------------|---------------------------------|
| Sex                 | F(1,31)=13.68           | p<0.001           | partial $\eta^2$ =0.306         |
| Diet                | F(1,31)=487.2           | p<0.001           | partial $\eta^2$ =0.940         |
| Time                | F(1.39,43.09)=3.731     | <b>p=0.047</b>    | partial $\eta^2$ = <b>0.107</b> |
| Time × Sex          | F(1.39,43.09)=2.248     | p=0.133           | partial $\eta^2$ =0.068         |
| Time × Diet         | F(1.39,43.09)=3.027     | p=0.076           | partial $\eta^2$ =0.089         |
| Sex × Diet          | F(1,31)=18.22           | <b>p&lt;0.001</b> | partial $\eta^2$ = <b>0.370</b> |
| Time × Sex × Diet   | F(1.39,43.09)=2.048     | p=0.154           | partial $\eta^2$ =0.062         |

S30B Table

| <b>Experiment 2</b> | <b>Water:NaCl Ratio</b> |                |                                 |
|---------------------|-------------------------|----------------|---------------------------------|
| Sex                 | F(1,29)=1.913           | p=0.177        | partial $\eta^2$ =0.062         |
| Diet                | F(1,29)=589.6           | p<0.001        | partial $\eta^2$ =0.953         |
| Time                | F(3.93,113.8)=2.126     | p=0.083        | partial $\eta^2$ =0.068         |
| Time × Sex          | F(3.93,113.8)=5.567     | p<0.001        | partial $\eta^2$ =0.161         |
| Time × Diet         | F(3.93,113.8)=1.161     | p=0.332        | partial $\eta^2$ =0.038         |
| Sex × Diet          | F(1,29)=2.208           | p=0.148        | partial $\eta^2$ =0.071         |
| Time × Sex × Diet   | F(3.93,113.8)=4.342     | <b>p=0.003</b> | partial $\eta^2$ = <b>0.130</b> |

S30C Table

| <b>Experiment 3</b> | <b>Water:NaCl Ratio</b> |                |                                 |
|---------------------|-------------------------|----------------|---------------------------------|
| Sex                 | F(1,28)=2.707           | p=0.111        | partial $\eta^2$ =0.088         |
| Diet                | F(1,28)=137.4           | p<0.001        | partial $\eta^2$ =0.831         |
| Time                | F(2.85,79.82)=1.662     | p=0.184        | partial $\eta^2$ =0.056         |
| Time × Sex          | F(2.85,79.82)=4.474     | p=0.007        | partial $\eta^2$ =0.138         |
| Time × Diet         | F(2.85,79.82)=1.050     | p=0.373        | partial $\eta^2$ =0.036         |
| Sex × Diet          | F(1,28)=0.347           | p=0.561        | partial $\eta^2$ =0.012         |
| Time × Sex × Diet   | F(2.85,79.82)=4.428     | <b>p=0.007</b> | partial $\eta^2$ = <b>0.137</b> |
