# Supplementary material for: Generalization of contextual fear is sex-specifically affected by high salt intake
Source: PubMed Central journal article supplement (PMC10343085; doi:10.1371/journal.pone.0286221), 2023-07-13
Supplement: pone.0286221.s031.pdf [file pone.0286221.s031.pdf]

## Supplemental Material for

Generalization of contextual fear is sex-specifically affected by high salt intake

Jasmin N. Beaver<sup>1,2</sup>, Brady L. Weber<sup>1,2</sup>, Matthew T. Ford<sup>1</sup>, Anna E. Anello<sup>1,2</sup>, Kaden M. Ruffin<sup>1</sup>,  
Sarah K. Kassis<sup>1,2</sup>, T. Lee Gilman<sup>1,2,3\*</sup>

<sup>1</sup>Department of Psychological Sciences, Kent State University, Kent, Ohio, United States of America

<sup>2</sup>Brain Health Research Institute, Kent State University, Kent, Ohio, United States of America

<sup>3</sup>Healthy Communities Research Institute, Kent State University, Kent, Ohio, United States of America

\*Corresponding Author

Email: [lgilman1@kent.edu](mailto:lgilman1@kent.edu) (TLG)

**S31 Table. Three-way repeated measures ANOVAs on weekly average kcal consumed per day by control no shock mice across Experiments.**

S31A Table

| <b>Experiment 1</b> | <b>kcal/day</b>     |                   |                        |
|---------------------|---------------------|-------------------|------------------------|
| Sex                 | F(1,31)=17.84       | <b>p&lt;0.001</b> | partial $\eta^2=0.365$ |
| Diet                | F(1,31)=4.655       | <b>p=0.039</b>    | partial $\eta^2=0.131$ |
| Time                | F(1.55,48.15)=0.003 | p=0.990           | partial $\eta^2=0.000$ |
| Time × Sex          | F(1.55,48.15)=2.408 | p=0.113           | partial $\eta^2=0.072$ |
| Time × Diet         | F(1.55,48.15)=0.225 | p=0.743           | partial $\eta^2=0.007$ |
| Sex × Diet          | F(1,31)=0.193       | p=0.663           | partial $\eta^2=0.006$ |
| Time × Sex × Diet   | F(1.55,48.15)=1.253 | p=0.288           | partial $\eta^2=0.039$ |

S31B Table

| <b>Experiment 2</b> | <b>kcal/day</b>     |                   |                        |
|---------------------|---------------------|-------------------|------------------------|
| Sex                 | F(1,29)=20.20       | <b>p&lt;0.001</b> | partial $\eta^2=0.411$ |
| Diet                | F(1,29)=6.500       | p=0.016           | partial $\eta^2=0.183$ |
| Time                | F(3.19,92.45)=3.755 | p=0.012           | partial $\eta^2=0.115$ |
| Time × Sex          | F(3.19,92.45)=0.524 | p=0.678           | partial $\eta^2=0.018$ |
| Time × Diet         | F(3.19,92.45)=4.385 | <b>p=0.005</b>    | partial $\eta^2=0.131$ |
| Sex × Diet          | F(1,29)=0.433       | p=0.516           | partial $\eta^2=0.015$ |
| Time × Sex × Diet   | F(3.19,92.45)=0.359 | p=0.795           | partial $\eta^2=0.012$ |

S31C Table

| <b>Experiment 3</b> | <b>kcal/day</b>     |                   |                        |
|---------------------|---------------------|-------------------|------------------------|
| Sex                 | F(1,28)=24.96       | <b>p&lt;0.001</b> | partial $\eta^2=0.471$ |
| Diet                | F(1,28)=5.135       | <b>p=0.031</b>    | partial $\eta^2=0.155$ |
| Time                | F(2.77,77.66)=1.733 | p=0.171           | partial $\eta^2=0.058$ |
| Time × Sex          | F(2.77,77.66)=1.512 | p=0.220           | partial $\eta^2=0.051$ |
| Time × Diet         | F(2.77,77.66)=1.539 | p=0.214           | partial $\eta^2=0.052$ |
| Sex × Diet          | F(1,28)=0.916       | p=0.347           | partial $\eta^2=0.032$ |
| Time × Sex × Diet   | F(2.77,77.66)=1.162 | p=0.328           | partial $\eta^2=0.040$ |
