# Supplementary material for: Generalization of contextual fear is sex-specifically affected by high salt intake
Source: PubMed Central journal article supplement (PMC10343085; doi:10.1371/journal.pone.0286221), 2023-07-13
Supplement: pone.0286221.s032.pdf [file pone.0286221.s032.pdf]

## Supplemental Material for

Generalization of contextual fear is sex-specifically affected by high salt intake

Jasmin N. Beaver<sup>1,2</sup>, Brady L. Weber<sup>1,2</sup>, Matthew T. Ford<sup>1</sup>, Anna E. Anello<sup>1,2</sup>, Kaden M. Ruffin<sup>1</sup>,  
Sarah K. Kassis<sup>1,2</sup>, T. Lee Gilman<sup>1,2,3\*</sup>

<sup>1</sup>Department of Psychological Sciences, Kent State University, Kent, Ohio, United States of America

<sup>2</sup>Brain Health Research Institute, Kent State University, Kent, Ohio, United States of America

<sup>3</sup>Healthy Communities Research Institute, Kent State University, Kent, Ohio, United States of America

\*Corresponding Author

Email: [lgilman1@kent.edu](mailto:lgilman1@kent.edu) (TLG)

**S32 Table. Three-way repeated measures ANOVAs on weekly average kcal consumed as a percentage of body weight by control no shock mice across Experiments.**

S32A Table

| <b>Experiment 1</b> | <b>Kcal as % BW</b> |                |                                 |
|---------------------|---------------------|----------------|---------------------------------|
| Sex                 | F(1,31)=0.151       | p=0.700        | partial $\eta^2$ =0.005         |
| Diet                | F(1,31)=3.279       | p=0.080        | partial $\eta^2$ =0.096         |
| Time                | F(1.65,51.04)=1.353 | p=0.265        | partial $\eta^2$ =0.042         |
| Time × Sex          | F(1.65,51.04)=3.592 | <b>p=0.043</b> | partial $\eta^2$ = <b>0.104</b> |
| Time × Diet         | F(1.65,51.04)=0.089 | p=0.880        | partial $\eta^2$ =0.003         |
| Sex × Diet          | F(1,31)=0.348       | p=0.560        | partial $\eta^2$ =0.011         |
| Time × Sex × Diet   | F(1.65,51.04)=1.194 | p=0.304        | partial $\eta^2$ =0.037         |

S32B Table

| <b>Experiment 2</b> | <b>Kcal as % BW</b> |                |                                 |
|---------------------|---------------------|----------------|---------------------------------|
| Sex                 | F(1,29)=7.328       | <b>p=0.011</b> | partial $\eta^2$ = <b>0.202</b> |
| Diet                | F(1,29)=1.017       | p=0.322        | partial $\eta^2$ =0.034         |
| Time                | F(2.59,75.20)=1.345 | p=0.267        | partial $\eta^2$ =0.044         |
| Time × Sex          | F(2.59,75.20)=0.667 | p=0.554        | partial $\eta^2$ =0.022         |
| Time × Diet         | F(2.59,75.20)=4.208 | <b>p=0.011</b> | partial $\eta^2$ = <b>0.127</b> |
| Sex × Diet          | F(1,29)=0.014       | p=0.906        | partial $\eta^2$ =0.000         |
| Time × Sex × Diet   | F(2.59,75.20)=0.430 | p=0.704        | partial $\eta^2$ =0.015         |

S32C Table

| <b>Experiment 3</b> | <b>Kcal as % BW</b> |                |                                 |
|---------------------|---------------------|----------------|---------------------------------|
| Sex                 | F(1,28)=0.431       | p=0.517        | partial $\eta^2$ =0.015         |
| Diet                | F(1,28)=4.291       | <b>p=0.048</b> | partial $\eta^2$ = <b>0.133</b> |
| Time                | F(3.02,84.44)=3.121 | <b>p=0.030</b> | partial $\eta^2$ = <b>0.100</b> |
| Time × Sex          | F(3.02,84.44)=1.336 | p=0.268        | partial $\eta^2$ =0.046         |
| Time × Diet         | F(3.02,84.44)=1.945 | p=0.128        | partial $\eta^2$ =0.065         |
| Sex × Diet          | F(1,28)=2.776       | p=0.107        | partial $\eta^2$ =0.090         |
| Time × Sex × Diet   | F(3.02,84.44)=0.648 | p=0.587        | partial $\eta^2$ =0.023         |
