# Supplementary material for: Generalization of contextual fear is sex-specifically affected by high salt intake
Source: PubMed Central journal article supplement (PMC10343085; doi:10.1371/journal.pone.0286221), 2023-07-13
Supplement: pone.0286221.s033.pdf [file pone.0286221.s033.pdf]

## Supplemental Material for

Generalization of contextual fear is sex-specifically affected by high salt intake

Jasmin N. Beaver<sup>1,2</sup>, Brady L. Weber<sup>1,2</sup>, Matthew T. Ford<sup>1</sup>, Anna E. Anello<sup>1,2</sup>, Kaden M. Ruffin<sup>1</sup>, Sarah K. Kassis<sup>1,2</sup>, T. Lee Gilman<sup>1,2,3\*</sup>

<sup>1</sup>Department of Psychological Sciences, Kent State University, Kent, Ohio, United States of America

<sup>2</sup>Brain Health Research Institute, Kent State University, Kent, Ohio, United States of America

<sup>3</sup>Healthy Communities Research Institute, Kent State University, Kent, Ohio, United States of America

\*Corresponding Author

Email: [lgilman1@kent.edu](mailto:lgilman1@kent.edu) (TLG)

**S33 Table. Details of confirmed outliers (> 5 standard deviations (SD) ± average of data set sans suspected outlier) within respective data sets. Outliers are marked with red font.**

S33A Table

| Male • Experiment 3 • 0.4%NaCl<br>No Shock • Training Context • Training baseline |       |                       |
|-----------------------------------------------------------------------------------|-------|-----------------------|
| Animal ID                                                                         | Data  | Outlier Determination |
| 0445                                                                              | 6.36  |                       |
| 0447                                                                              | 8.93  |                       |
| 0514                                                                              | 24.01 | >6 SD beyond mean     |
| 0519                                                                              | 0.88  | 2.66 Avg              |
| 0523                                                                              | 0.69  | 3.54 SD               |
| 0529                                                                              | 0.00  | 23.88 Avg + 6 SD      |
| 0697                                                                              | 0.00  |                       |
| 0796                                                                              | 1.75  |                       |

S33B Table

| Male • Experiment 1 • 4.0%NaCl<br>No Shock • Training Context • Testing |       |                       |
|-------------------------------------------------------------------------|-------|-----------------------|
| Animal ID                                                               | Data  | Outlier Determination |
| 0331                                                                    | 30.21 |                       |
| 0345                                                                    | 18.41 |                       |
| 0352                                                                    | 75.65 | >7 SD beyond mean     |
| 0377                                                                    | 3.63  |                       |
| 0388                                                                    | 10.92 | 11.56 Avg             |
| 0391                                                                    | 6.03  | 9.04 SD               |
| 0409                                                                    | 5.15  | 74.81 Avg + 7 SD      |
| 0415                                                                    | 12.92 |                       |
| 0422                                                                    | 5.24  |                       |

S33C Table

| Male • Experiment 1 • 4.0%NaCl<br>Shock • Training Context • Testing |       |                       |
|----------------------------------------------------------------------|-------|-----------------------|
| Animal ID                                                            | Data  | Outlier Determination |
| 0342                                                                 | 86.01 | >5 SD beyond mean     |

|      |       |       |                   |
|------|-------|-------|-------------------|
| 0344 | 39.07 | 30.84 | <i>Avg</i>        |
| 0357 | 33.78 | 10.65 | <i>SD</i>         |
| 0367 | 21.75 | 84.09 | <i>Avg + 5 SD</i> |
| 0387 | 14.97 |       |                   |
| 0413 | 32.57 |       |                   |
| 0416 | 46.73 |       |                   |
| 0423 | 27.04 |       |                   |

S33D Table

| Female • Experiment 2 • 0.4%NaCl<br>Shock • Neutral Context • Testing |              |                             |                   |
|-----------------------------------------------------------------------|--------------|-----------------------------|-------------------|
| Animal ID                                                             | Data         | Outlier Determination       |                   |
| 0608                                                                  | 3.56         |                             |                   |
| 0610                                                                  | 9.26         |                             |                   |
| 0613                                                                  | 3.16         |                             |                   |
| 0622                                                                  | 6.15         |                             |                   |
| 0626                                                                  | 3.12         | 6.35                        | <i>Avg</i>        |
| 0667                                                                  | 3.71         | 4.05                        | <i>SD</i>         |
| 0677                                                                  | 7.10         | 30.63                       | <i>Avg + 6 SD</i> |
| 0678                                                                  | 14.73        |                             |                   |
| <b>0682</b>                                                           | <b>32.69</b> | <b>&gt;6 SD beyond mean</b> |                   |

S33E Table

| Male • Experiment 2 • 0.4%NaCl<br>Shock • Neutral Context • Testing |              |                              |                    |
|---------------------------------------------------------------------|--------------|------------------------------|--------------------|
| Animal ID                                                           | Data         | Outlier Determination        |                    |
| 0445                                                                | 2.31         |                              |                    |
| 0447                                                                | 2.58         |                              |                    |
| 0514                                                                | 0.58         | 2.04                         | <i>Avg</i>         |
| 0519                                                                | 6.52         | 2.05                         | <i>SD</i>          |
| 0523                                                                | 0.76         | 26.61                        | <i>Avg + 12 SD</i> |
| 0529                                                                | 2.57         |                              |                    |
| <b>0697</b>                                                         | <b>27.97</b> | <b>&gt;12 SD beyond mean</b> |                    |
| 0796                                                                | 0.27         |                              |                    |
| 0807                                                                | 0.75         |                              |                    |

S33F Table

| Male • Experiment 3 • 0.4%NaCl<br>Shock • Training Context • Testing |       |                             |                   |
|----------------------------------------------------------------------|-------|-----------------------------|-------------------|
| Animal ID                                                            | Data  | Outlier Determination       |                   |
| 0073                                                                 | 69.01 | 79.18                       | <i>Avg</i>        |
| 0187                                                                 | 80.66 | 7.74                        | <i>SD</i>         |
| 0278                                                                 | 83.16 | 40.46                       | <i>Avg - 5 SD</i> |
| 0312                                                                 | 80.07 |                             |                   |
| 0324                                                                 | 77.38 |                             |                   |
| 0428                                                                 | 92.45 |                             |                   |
| 0434                                                                 | 38.13 | <b>&gt;5 SD beyond mean</b> |                   |
| 0436                                                                 | 71.55 |                             |                   |

S33G Table

| Male • Experiment 3 • 4.0%NaCl<br>Osmolality |      |                             |                   |
|----------------------------------------------|------|-----------------------------|-------------------|
| Animal ID                                    | Data | Outlier Determination       |                   |
| 0077                                         | 338  | <b>&gt;7 SD beyond mean</b> |                   |
| 0188                                         | 315  |                             |                   |
| 0306                                         | 316  |                             |                   |
| 0311                                         | 322  | 316.29                      | <i>Avg</i>        |
| 0322                                         | 314  | 2.87                        | <i>SD</i>         |
| 0427                                         | 318  | 336.38                      | <i>Avg + 7 SD</i> |
| 0435                                         | 314  |                             |                   |
| 0438                                         | 315  |                             |                   |

S33H Table

| Female • Experiment 1 • 0.4%NaCl<br>No Shock • Training Context • Corticosterone Log |      |                             |                   |
|--------------------------------------------------------------------------------------|------|-----------------------------|-------------------|
| Animal ID                                                                            | Data | Outlier Determination       |                   |
| 0394                                                                                 | 1.67 |                             |                   |
| 0531                                                                                 | 1.84 |                             |                   |
| 0539                                                                                 | 1.99 |                             |                   |
| 0544                                                                                 | 1.64 | 1.75                        | <i>Avg</i>        |
| 0550                                                                                 | 1.48 | 0.19                        | <i>SD</i>         |
| 0556                                                                                 | 1.87 | 0.82                        | <i>Avg - 5 SD</i> |
| 0642                                                                                 | 0.79 | <b>&gt;5 SD beyond mean</b> |                   |

S33I Table

| Female • Experiment 2 • 0.4%NaCl<br>Shock • Training Context • Corticosterone Log |             |                             |
|-----------------------------------------------------------------------------------|-------------|-----------------------------|
| Animal ID                                                                         | Data        | Outlier Determination       |
| 0616                                                                              | 1.13        |                             |
| <b>0618</b>                                                                       | <b>1.94</b> | <b>&gt;7 SD beyond mean</b> |
| 0620                                                                              | 1.17        |                             |
| 0625                                                                              | 0.86        | 1.03 <i>Avg</i>             |
| 0628                                                                              | 0.88        | 0.12 <i>SD</i>              |
| 0676                                                                              | 1.05        | 1.86 <i>Avg + 7 SD</i>      |
| 0681                                                                              | 1.14        |                             |
| 0683                                                                              | 1.04        |                             |
| 0771                                                                              | 0.96        |                             |

S33J Table

| Male • Experiment 1 • 0.4%NaCl • Shock<br>Training Context • Water:NaCl Ratio Wk 1 |              |                             |
|------------------------------------------------------------------------------------|--------------|-----------------------------|
| Animal ID                                                                          | Data         | Outlier Determination       |
| 0341                                                                               | 333.63       |                             |
| 0353                                                                               | 153.57       |                             |
| <b>0354</b>                                                                        | <b>441.7</b> | <b>&gt;6 SD beyond mean</b> |
| 0368                                                                               | 229.87       |                             |
| 0389                                                                               | 218.90       | 231.82 <i>Avg</i>           |
| 0407                                                                               | 218.37       | 34.28 <i>SD</i>             |
| 0417                                                                               | 257.84       | 437.51 <i>Avg + 6 SD</i>    |
| 0419                                                                               | 210.53       |                             |

S33K Table

| Male • Experiment 1 • 0.4%NaCl • Shock<br>Neutral Context • Water:NaCl Ratio Wk 2 |                |                             |
|-----------------------------------------------------------------------------------|----------------|-----------------------------|
| Animal ID                                                                         | Data           | Outlier Determination       |
| 0333                                                                              | 349.81         | 346.46 <i>Avg</i>           |
| 0343                                                                              | 342.23         | 84.92 <i>SD</i>             |
| 0350                                                                              | 301.87         | 1110.78 <i>Avg + 9 SD</i>   |
| 0358                                                                              | 262.82         |                             |
| 0376                                                                              | 383.72         |                             |
| 0390                                                                              | 486.90         |                             |
| <b>0408</b>                                                                       | <b>1127.25</b> | <b>&gt;5 SD beyond mean</b> |
| 0418                                                                              | 224.22         |                             |

|      |        |
|------|--------|
| 0421 | 420.07 |
|------|--------|

S33L Table

| Male • Experiment 1 • 0.4%NaCl • Shock<br>Neutral Context • Water:NaCl Ratio Wk 3 |        |                       |                    |
|-----------------------------------------------------------------------------------|--------|-----------------------|--------------------|
| Animal ID                                                                         | Data   | Outlier Determination |                    |
| 0333                                                                              | 302.97 | 275.09                | <i>Avg</i>         |
| 0343                                                                              | 258.75 | 47.54                 | <i>SD</i>          |
| 0350                                                                              | 272.09 | 1225.95               | <i>Avg + 20 SD</i> |
| 0358                                                                              | 188.51 |                       |                    |
| 0376                                                                              | 320.86 |                       |                    |
| 0390                                                                              | 258.38 |                       |                    |
| 0408                                                                              | 1228.7 | >20 SD beyond mean    |                    |
| 0418                                                                              | 256.58 |                       |                    |
| 0421                                                                              | 342.59 |                       |                    |

S33M Table

| Male • Experiment 1 • 4.0%NaCl • Shock<br>Neutral Context • Water:NaCl Ratio Wk 2.5 |        |                       |                   |
|-------------------------------------------------------------------------------------|--------|-----------------------|-------------------|
| Animal ID                                                                           | Data   | Outlier Determination |                   |
| 0329                                                                                | 75.44  | 64.79                 | <i>Avg</i>        |
| 0332                                                                                | 59.85  | 9.38                  | <i>SD</i>         |
| 0340                                                                                | 65.41  | 139.82                | <i>Avg + 8 SD</i> |
| 0351                                                                                | 140.65 | >8 SD beyond mean     |                   |
| 0371                                                                                | 75.72  |                       |                   |
| 0411                                                                                | 68.95  |                       |                   |
| 0412                                                                                | 57.52  |                       |                   |
| 0420                                                                                | 50.65  |                       |                   |

S33N Table

| Female • Experiment 2 • 0.4%NaCl • Shock<br>Training Context • Water:NaCl Ratio Wk 4 |        |                       |  |
|--------------------------------------------------------------------------------------|--------|-----------------------|--|
| Animal ID                                                                            | Data   | Outlier Determination |  |
| 0616                                                                                 | 375.63 |                       |  |
| 0618                                                                                 | 900.00 | >5 SD beyond mean     |  |
| 0620                                                                                 | 433.96 |                       |  |
| 0625                                                                                 | 309.68 |                       |  |

|      |        |        |                   |
|------|--------|--------|-------------------|
| 0628 | 376.56 | 424.32 | <i>Avg</i>        |
| 0676 | 474.04 | 86.14  | <i>SD</i>         |
| 0681 | 377.40 | 855.01 | <i>Avg + 5 SD</i> |
| 0683 | 454.14 |        |                   |
| 0771 | 593.11 |        |                   |

S33O Table

| Male • Experiment 2 • 0.4%NaCl • Shock<br>Training Context • Water:NaCl Ratio Wk 2 |        |                             |                   |
|------------------------------------------------------------------------------------|--------|-----------------------------|-------------------|
| Animal ID                                                                          | Data   | Outlier Determination       |                   |
| 0451                                                                               | 310.26 | 329.64                      | <i>Avg</i>        |
| 0453                                                                               | 364.10 | 81.02                       | <i>SD</i>         |
| 0802                                                                               | 243.72 | 815.77                      | <i>Avg + 6 SD</i> |
| 0512                                                                               | 257.58 |                             |                   |
| 0516                                                                               | 234.38 |                             |                   |
| 0520                                                                               | 459.49 |                             |                   |
| 0526                                                                               | 381.22 |                             |                   |
| 0702                                                                               | 386.36 |                             |                   |
| 0795                                                                               | 848.89 | <b>&gt;6 SD beyond mean</b> |                   |

S33P Table

| Female • Experiment 3 • 0.4%NaCl • Shock<br>Neutral Context • Water:NaCl Ratio Wk 2 |        |                             |                   |
|-------------------------------------------------------------------------------------|--------|-----------------------------|-------------------|
| Animal ID                                                                           | Data   | Outlier Determination       |                   |
| 0559                                                                                | 777.14 | <b>&gt;5 SD beyond mean</b> |                   |
| 0568                                                                                | 443.72 | 329.34                      | <i>Avg</i>        |
| 0570                                                                                | 416.26 | 74.83                       | <i>SD</i>         |
| 0589                                                                                | 245.56 | 703.51                      | <i>Avg + 5 SD</i> |
| 0591                                                                                | 257.72 |                             |                   |
| 0651                                                                                | 270.49 |                             |                   |
| 0656                                                                                | 341.22 |                             |                   |
| 0663                                                                                | 367.35 |                             |                   |
| 0664                                                                                | 292.40 |                             |                   |

S33Q Table

| Female • Experiment 3 • 4.0%NaCl • Shock<br>Neutral Context • Water:NaCl Ratio Wk 4 |  |  |  |
|-------------------------------------------------------------------------------------|--|--|--|
|-------------------------------------------------------------------------------------|--|--|--|

| <b>Animal ID</b> | <b>Data</b>   | <b>Outlier Determination</b> |                   |
|------------------|---------------|------------------------------|-------------------|
| 0561             | 75.48         | 75.50                        | <i>Avg</i>        |
| 0563             | 80.97         | 7.02                         | <i>SD</i>         |
| 0567             | 70.87         | 110.58                       | <i>Avg + 5 SD</i> |
| <b>0573</b>      | <b>111.94</b> | <b>&gt;5 SD beyond mean</b>  |                   |
| 0586             | 76.37         |                              |                   |
| 0660             | 87.56         |                              |                   |
| 0662             | 67.32         |                              |                   |
| 0665             | 69.94         |                              |                   |
