# Supplementary material for: Generalization of contextual fear is sex-specifically affected by high salt intake
Source: PubMed Central journal article supplement (PMC10343085; doi:10.1371/journal.pone.0286221), 2023-07-13
Supplement: pone.0286221.s040.pdf [file pone.0286221.s040.pdf]

## Supplemental Material for

Generalization of contextual fear is sex-specifically affected by high salt intake

Jasmin N. Beaver<sup>1,2</sup>, Brady L. Weber<sup>1,2</sup>, Matthew T. Ford<sup>1</sup>, Anna E. Anello<sup>1,2</sup>, Kaden M. Ruffin<sup>1</sup>,  
Sarah K. Kassis<sup>1,2</sup>, T. Lee Gilman<sup>1,2,3\*</sup>

<sup>1</sup>Department of Psychological Sciences, Kent State University, Kent, Ohio, United States of America

<sup>2</sup>Brain Health Research Institute, Kent State University, Kent, Ohio, United States of America

<sup>3</sup>Healthy Communities Research Institute, Kent State University, Kent, Ohio, United States of America

\*Corresponding Author

Email: [lgilman1@kent.edu](mailto:lgilman1@kent.edu) (TLG)

S7 Figure

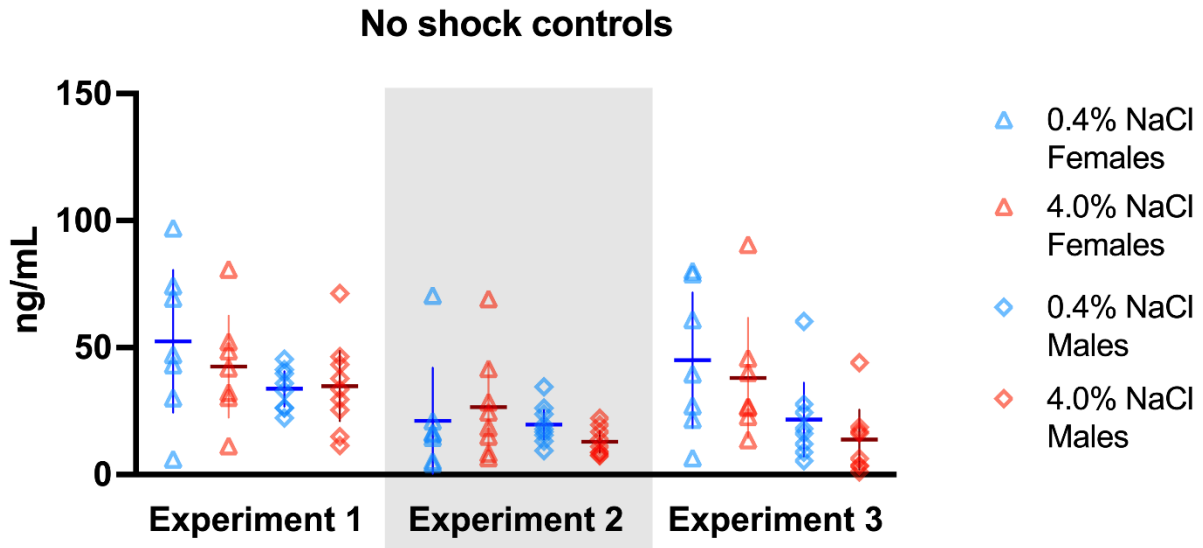

**S7 Fig. Raw (pre-transformed) serum corticosterone levels of no shock control mice across Experiments.**

Females represented by triangles, males by diamonds; 0.4% NaCl represented by blue symbols, 4.0% NaCl represented by red symbols. Experiment 1: 0.4% NaCl females, n=6; 4.0% NaCl females, n=7; 0.4% NaCl males, n=8; 4.0% NaCl males, n=9. Experiment 2 (grey shading): 0.4% NaCl females, n=7; 4.0% NaCl females, n=8; 0.4% NaCl males, n=9; 4.0% NaCl males, n=9. Experiment 3: 0.4% NaCl females, n=7; 4.0% NaCl females, n=7; 0.4% NaCl males, n=8; 4.0% NaCl males, n=8. Data are graphed as mean  $\pm$  95% confidence interval. These data were not statistically analyzed – log transformations were applied to normalize data distribution prior to analyzing statistically.
