# Supplementary material for: Generalization of contextual fear is sex-specifically affected by high salt intake
Source: PubMed Central journal article supplement (PMC10343085; doi:10.1371/journal.pone.0286221), 2023-07-13
Supplement: pone.0286221.s052.pdf [file pone.0286221.s052.pdf]

## Supplemental Material for

Generalization of contextual fear is sex-specifically affected by high salt intake

Jasmin N. Beaver<sup>1,2</sup>, Brady L. Weber<sup>1,2</sup>, Matthew T. Ford<sup>1</sup>, Anna E. Anello<sup>1,2</sup>, Kaden M. Ruffin<sup>1</sup>,  
Sarah K. Kassis<sup>1,2</sup>, T. Lee Gilman<sup>1,2,3\*</sup>

<sup>1</sup>Department of Psychological Sciences, Kent State University, Kent, Ohio, United States of America

<sup>2</sup>Brain Health Research Institute, Kent State University, Kent, Ohio, United States of America

<sup>3</sup>Healthy Communities Research Institute, Kent State University, Kent, Ohio, United States of America

\*Corresponding Author

Email: [lgilman1@kent.edu](mailto:lgilman1@kent.edu) (TLG)

S19 Figure

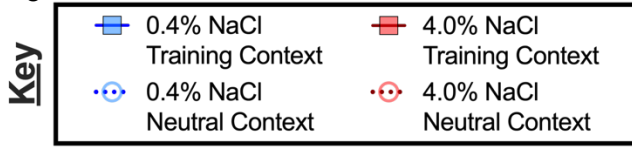

**A**

**Experiment 1**

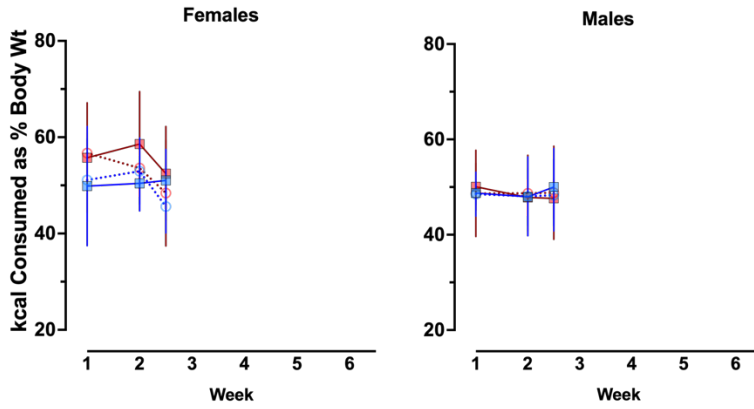

**B**

**Experiment 2**

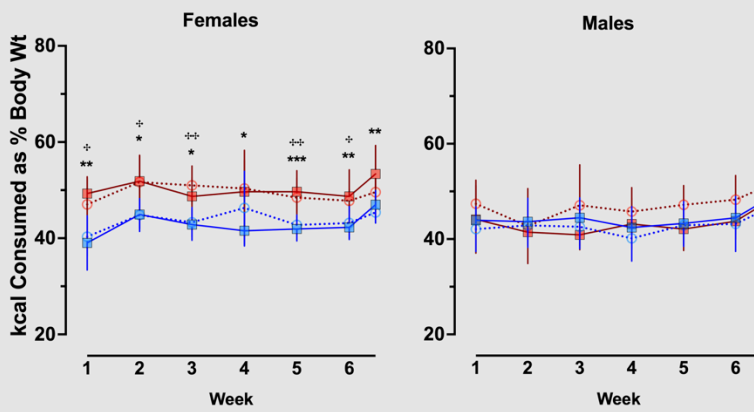

**C**

**Experiment 3**

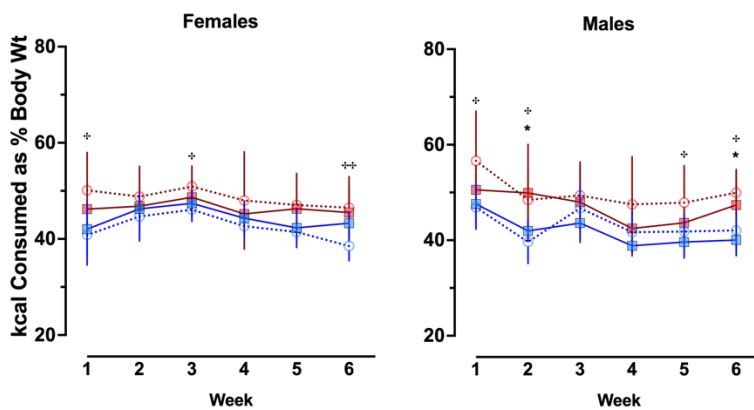

**S19 Fig. Consumed kcal as a percentage of body weight by context fear conditioned mice across Experiments.**

Mice assigned to 0.4% NaCl represented by blue symbols, mice assigned to 4.0% NaCl represented by red symbols; mice to be tested in Training Context represented by squares and solid lines, mice to be tested in Neutral Context represented by circles and dotted lines.

Consumed kcal as a percentage of body weight was calculated for each full week, plus the partial weeks at the conclusion of A) Experiment 1 and B) Experiment 2 (grey shading). Some data loss occurred on the very last weighing day for a subset of animals in C) Experiment 3, thus graphs and repeated measures statistical analyses for Experiment 3 calculations cease at week 6 to maximize inclusion of mice in repeated measures analyses. Experiment 1: 0.4% NaCl females Training Context, n=8; 0.4% NaCl females Neutral Context, n=9; 4.0% NaCl females Training Context, n=8; 4.0% NaCl females Neutral Context, n=9; 0.4% NaCl males Training Context, n=8; 0.4% NaCl males Neutral Context, n=9; 4.0% NaCl males Training Context, n=8; 4.0% NaCl males Neutral Context, n=8. Experiment 2: 0.4% NaCl females Training Context, n=9; 0.4% NaCl females Neutral Context, n=9; 4.0% NaCl females Training Context, n=8; 4.0% NaCl females Neutral Context, n=8; 0.4% NaCl males Training Context, n=9; 0.4% NaCl males Neutral Context, n=9; 4.0% NaCl males Training Context, n=8; 4.0% NaCl males Neutral Context, n=10. Experiment 3: 0.4% NaCl females Training Context, n=8; 0.4% NaCl females Neutral Context, n=9; 4.0% NaCl females Training Context, n=9; 4.0% NaCl females Neutral Context, n=8; 0.4% NaCl males Training Context, n=8; 0.4% NaCl males Neutral Context, n=8; 4.0% NaCl males Training Context, n=8; 4.0% NaCl males Neutral Context, n=8. Data are graphed as mean  $\pm$  95% confidence interval. \*p<0.05, \*\*p<0.01, \*\*\*p<0.001 indicate difference between mice within the same sex consuming 0.4% NaCl versus 4.0% NaCl and tested in Training Context. +p<0.05, ++p<0.01, +++p<0.001 indicate difference

between mice within the same sex consuming 0.4% NaCl versus 4.0% NaCl and tested in Neutral Context.
